# Supplementary material for: α-Ketoglutarate protects against cartilage damage via epigenetically driven metabolic reprogramming in osteoarthritis models
Source: JCI journal article supplement (doi:10.1172/jci172380), 2026-03-02

**Figure 1E**

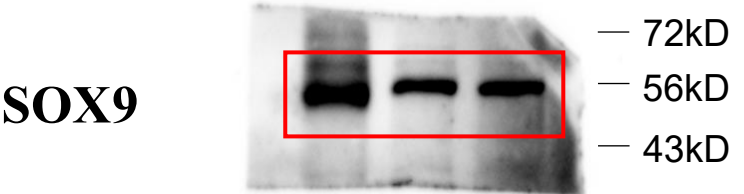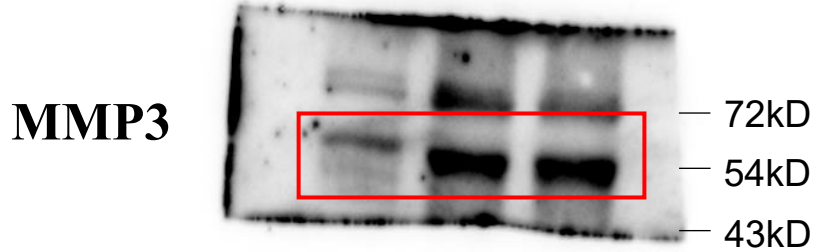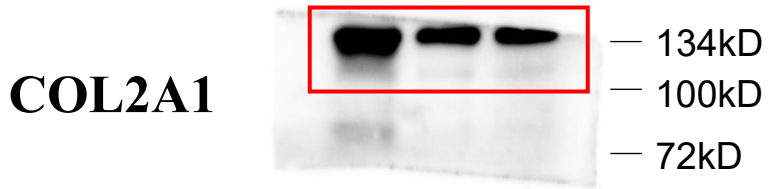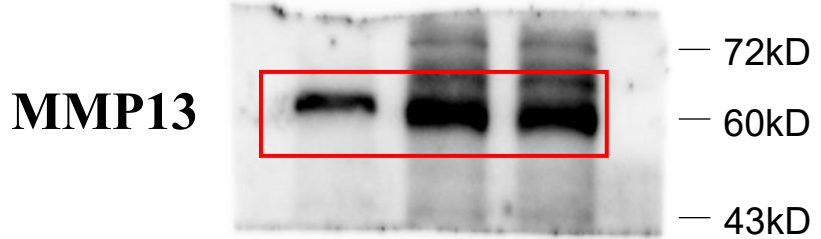

**Figure 1E**

**ADAMTS5**

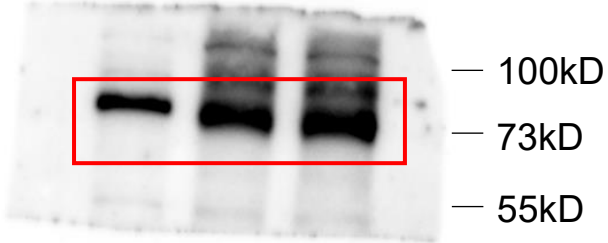

**NOS2**

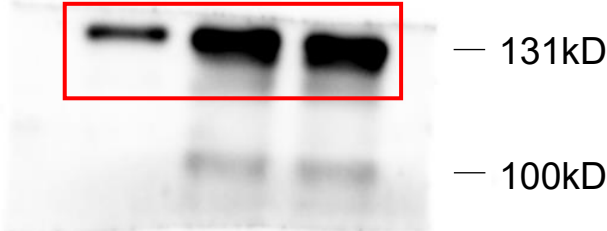

**GAPDH**

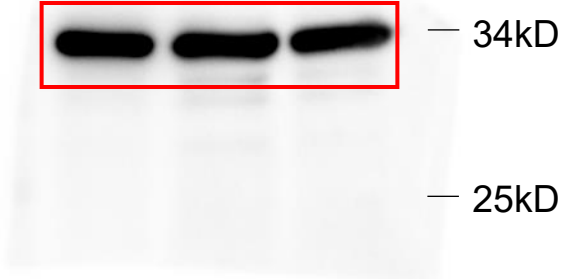

**Figure 1G**

**SLC1A5**

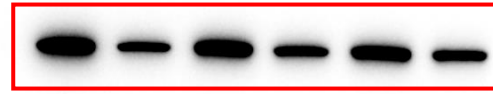

— 56kD

**GLS1**

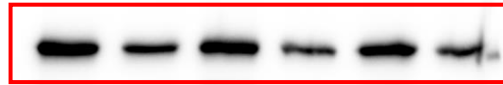

— 65kD

**GAPDH**

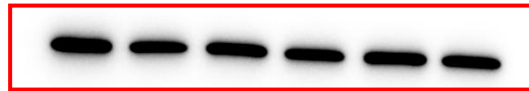

— 34kD

**Figure 2B**

**SOX9**

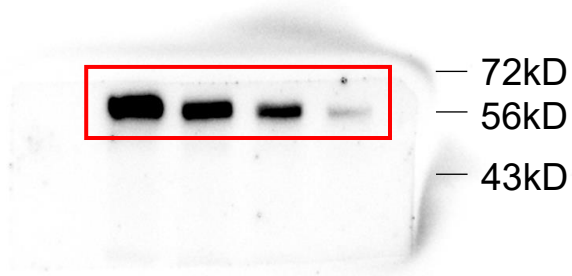

**MMP3**

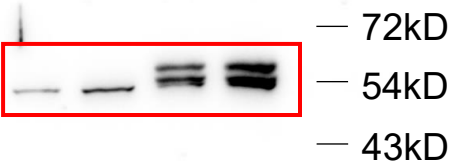

**COL2A1**

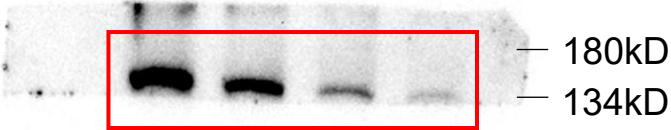

**Figure 2B**

**MMP13**

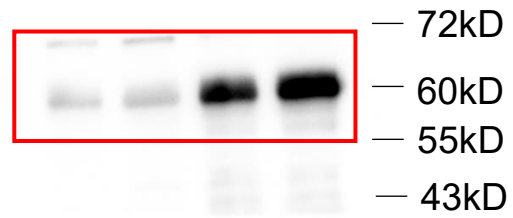

**NOS2**

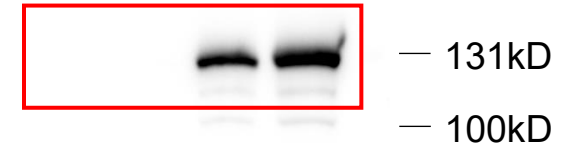

**ADAMTS5**

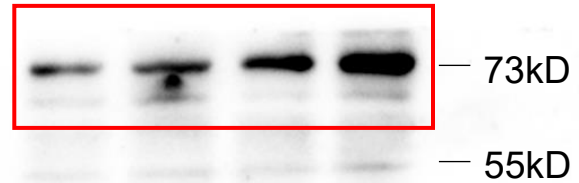

**GAPDH**

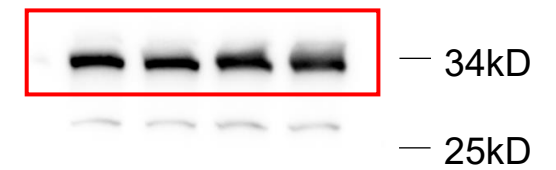

**Figure 3B**

**SOX9**

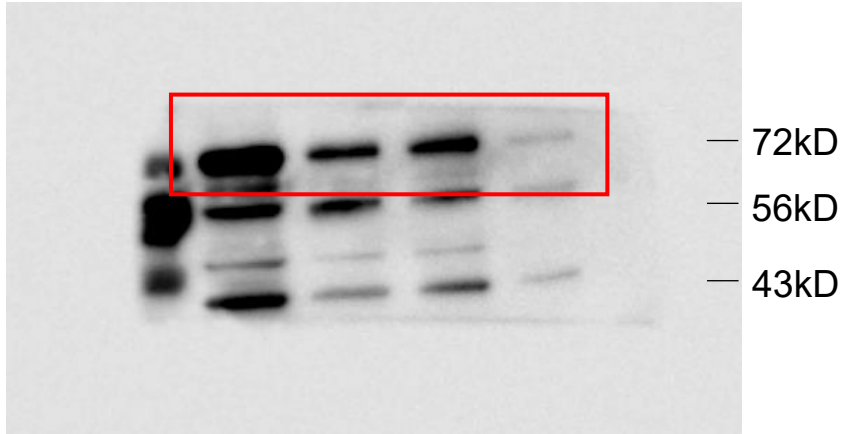

**MMP3**

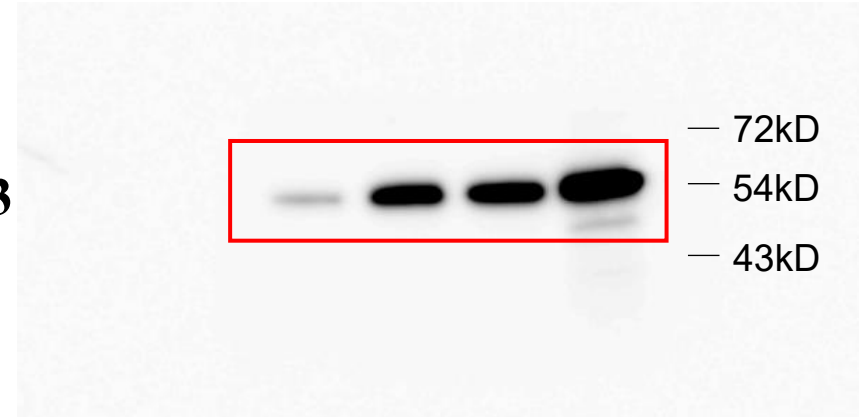

**MMP13**

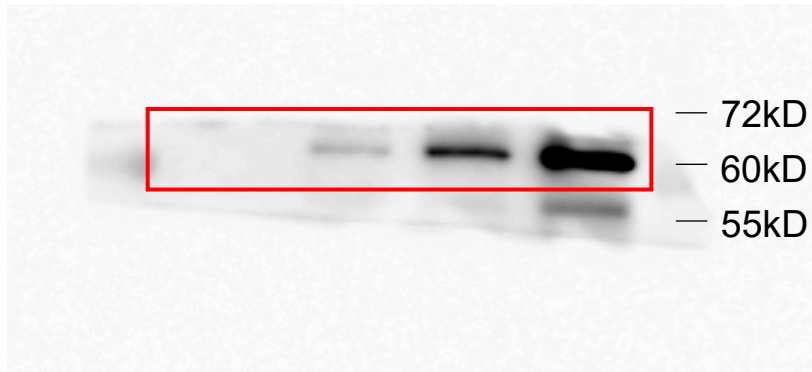

**GAPDH**

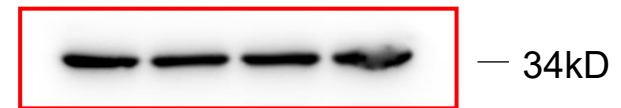

**Figure 3B**

**ADAMTS5**

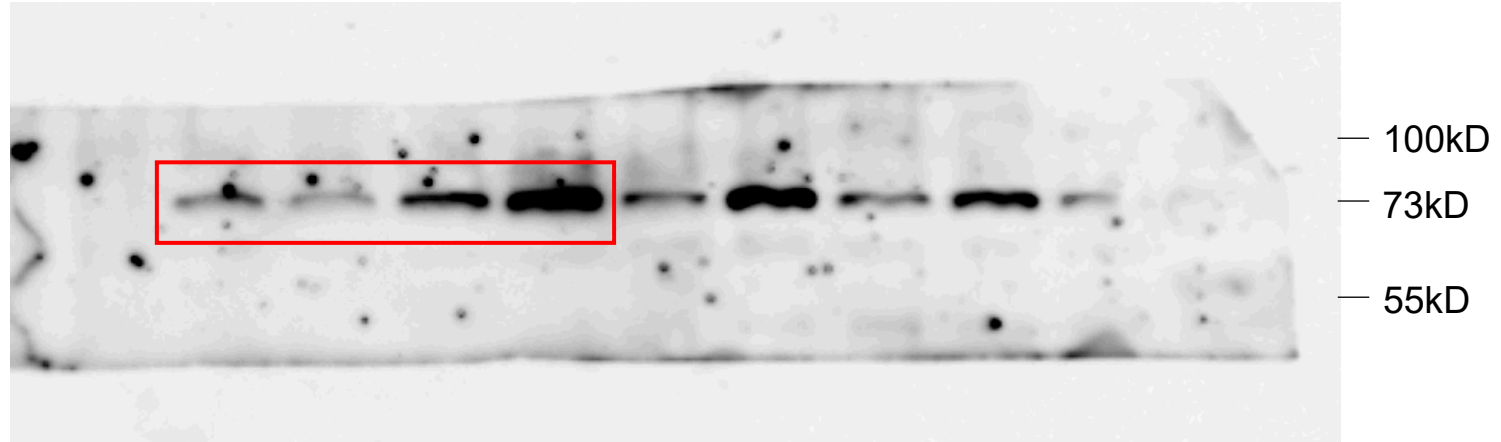

**GAPDH**

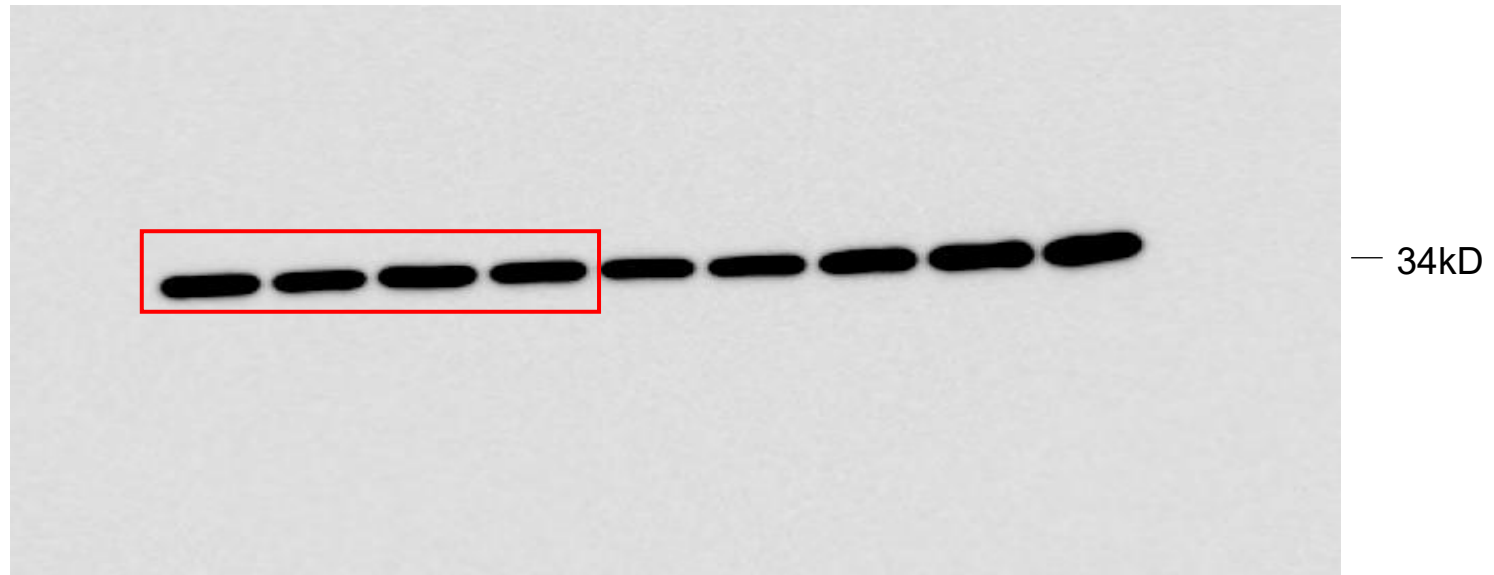

**Figure 3B**

**COL2A1**

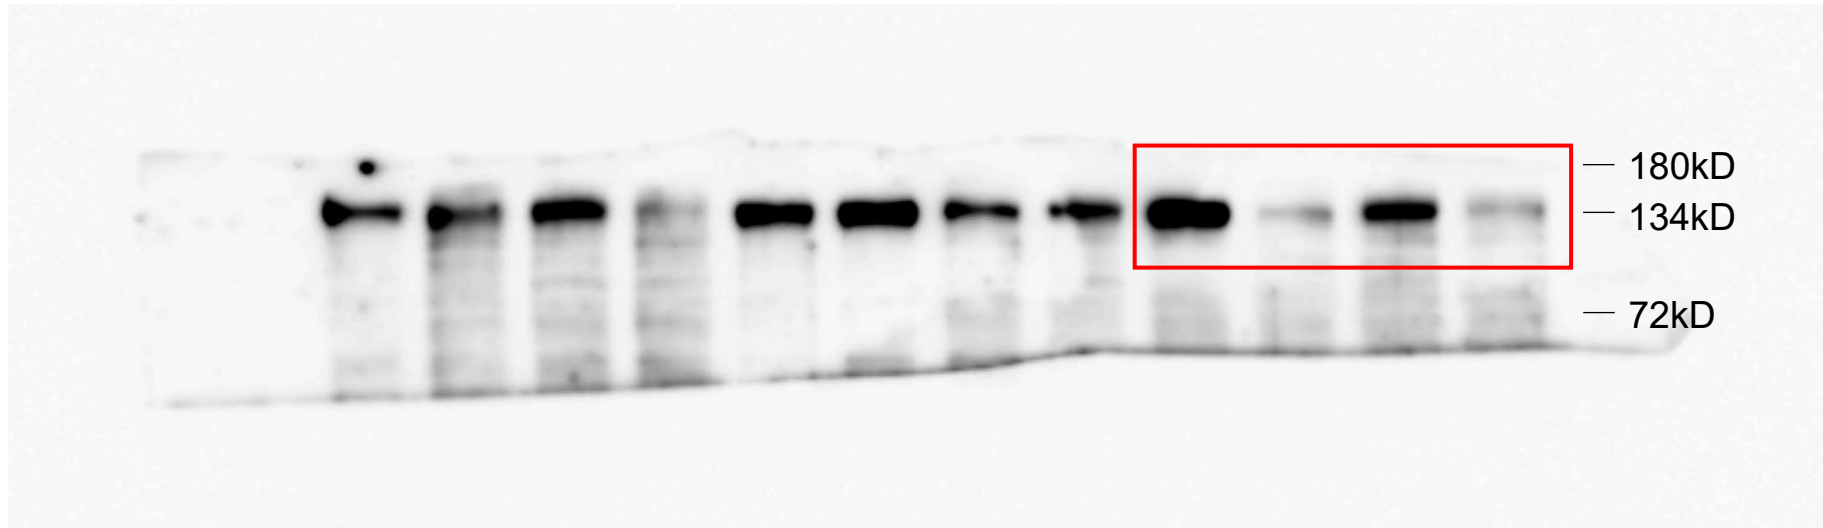

**Figure 3B**

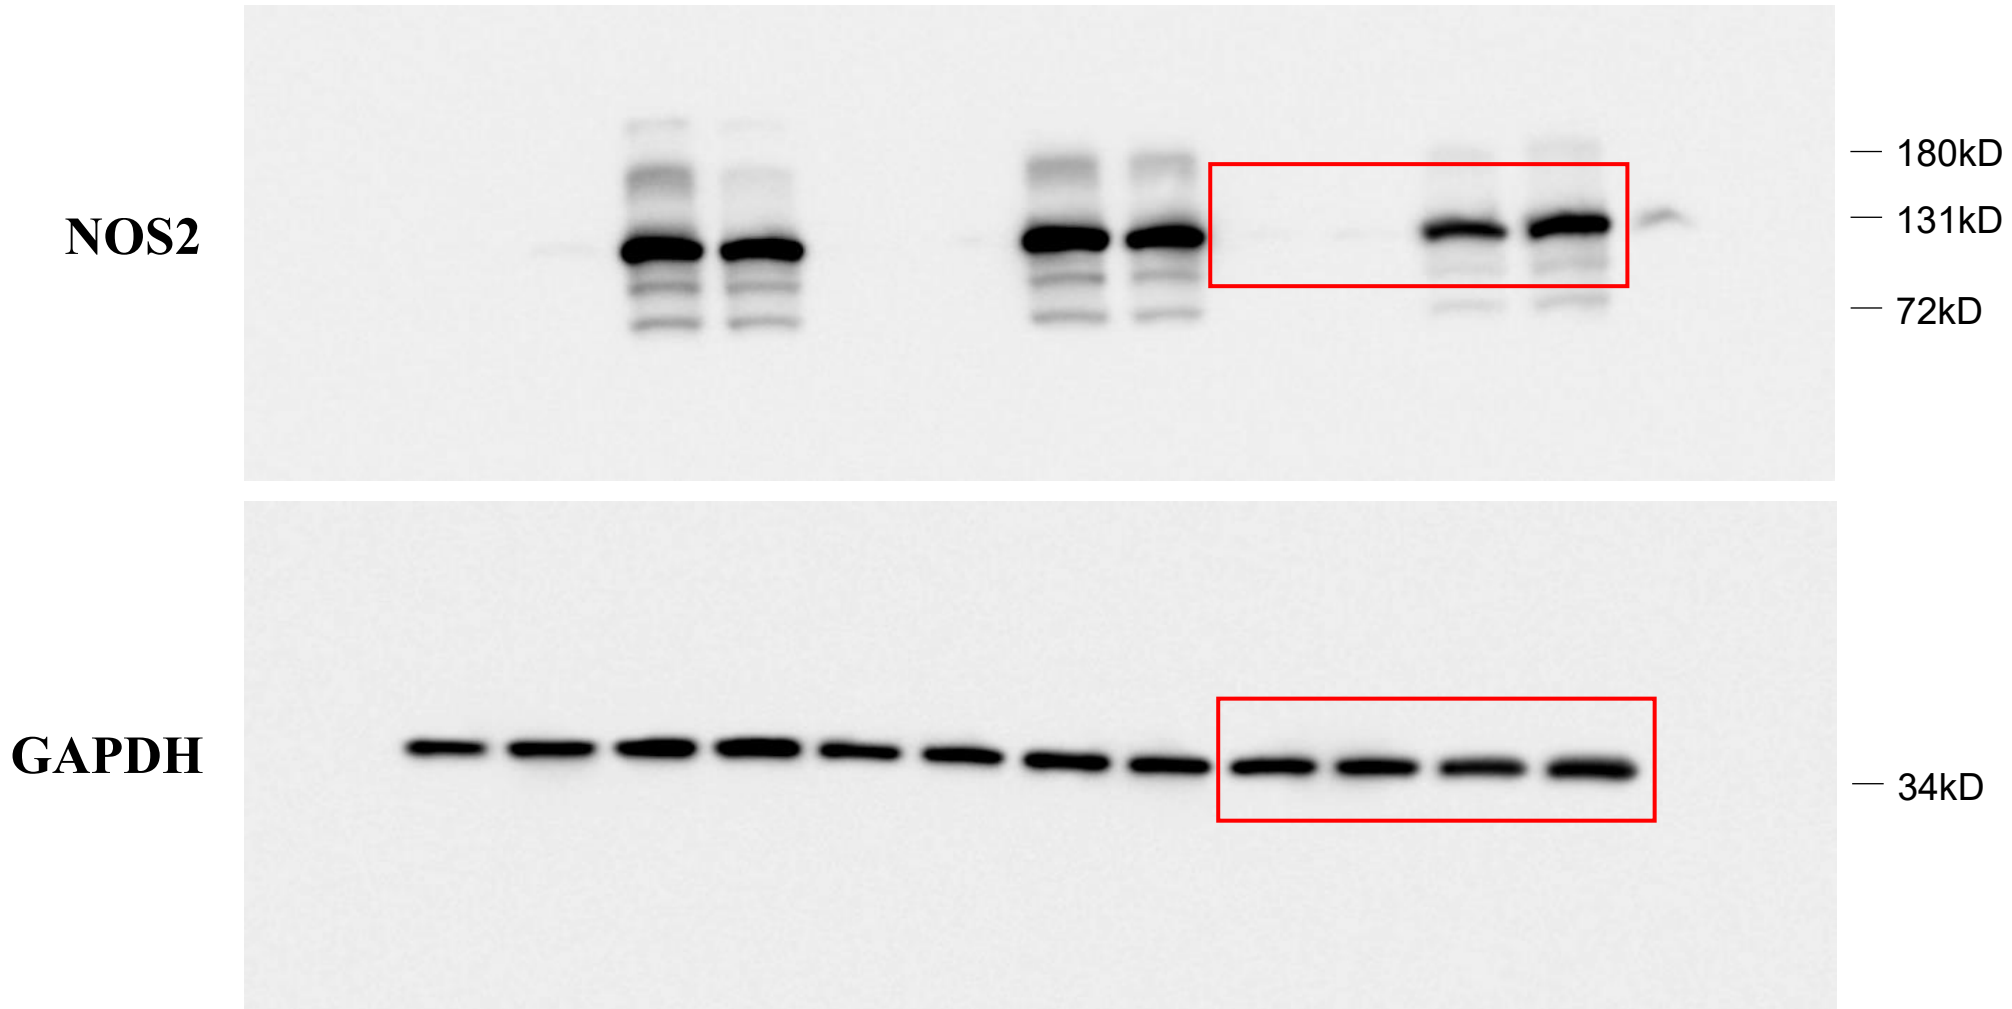

**Figure 4E**

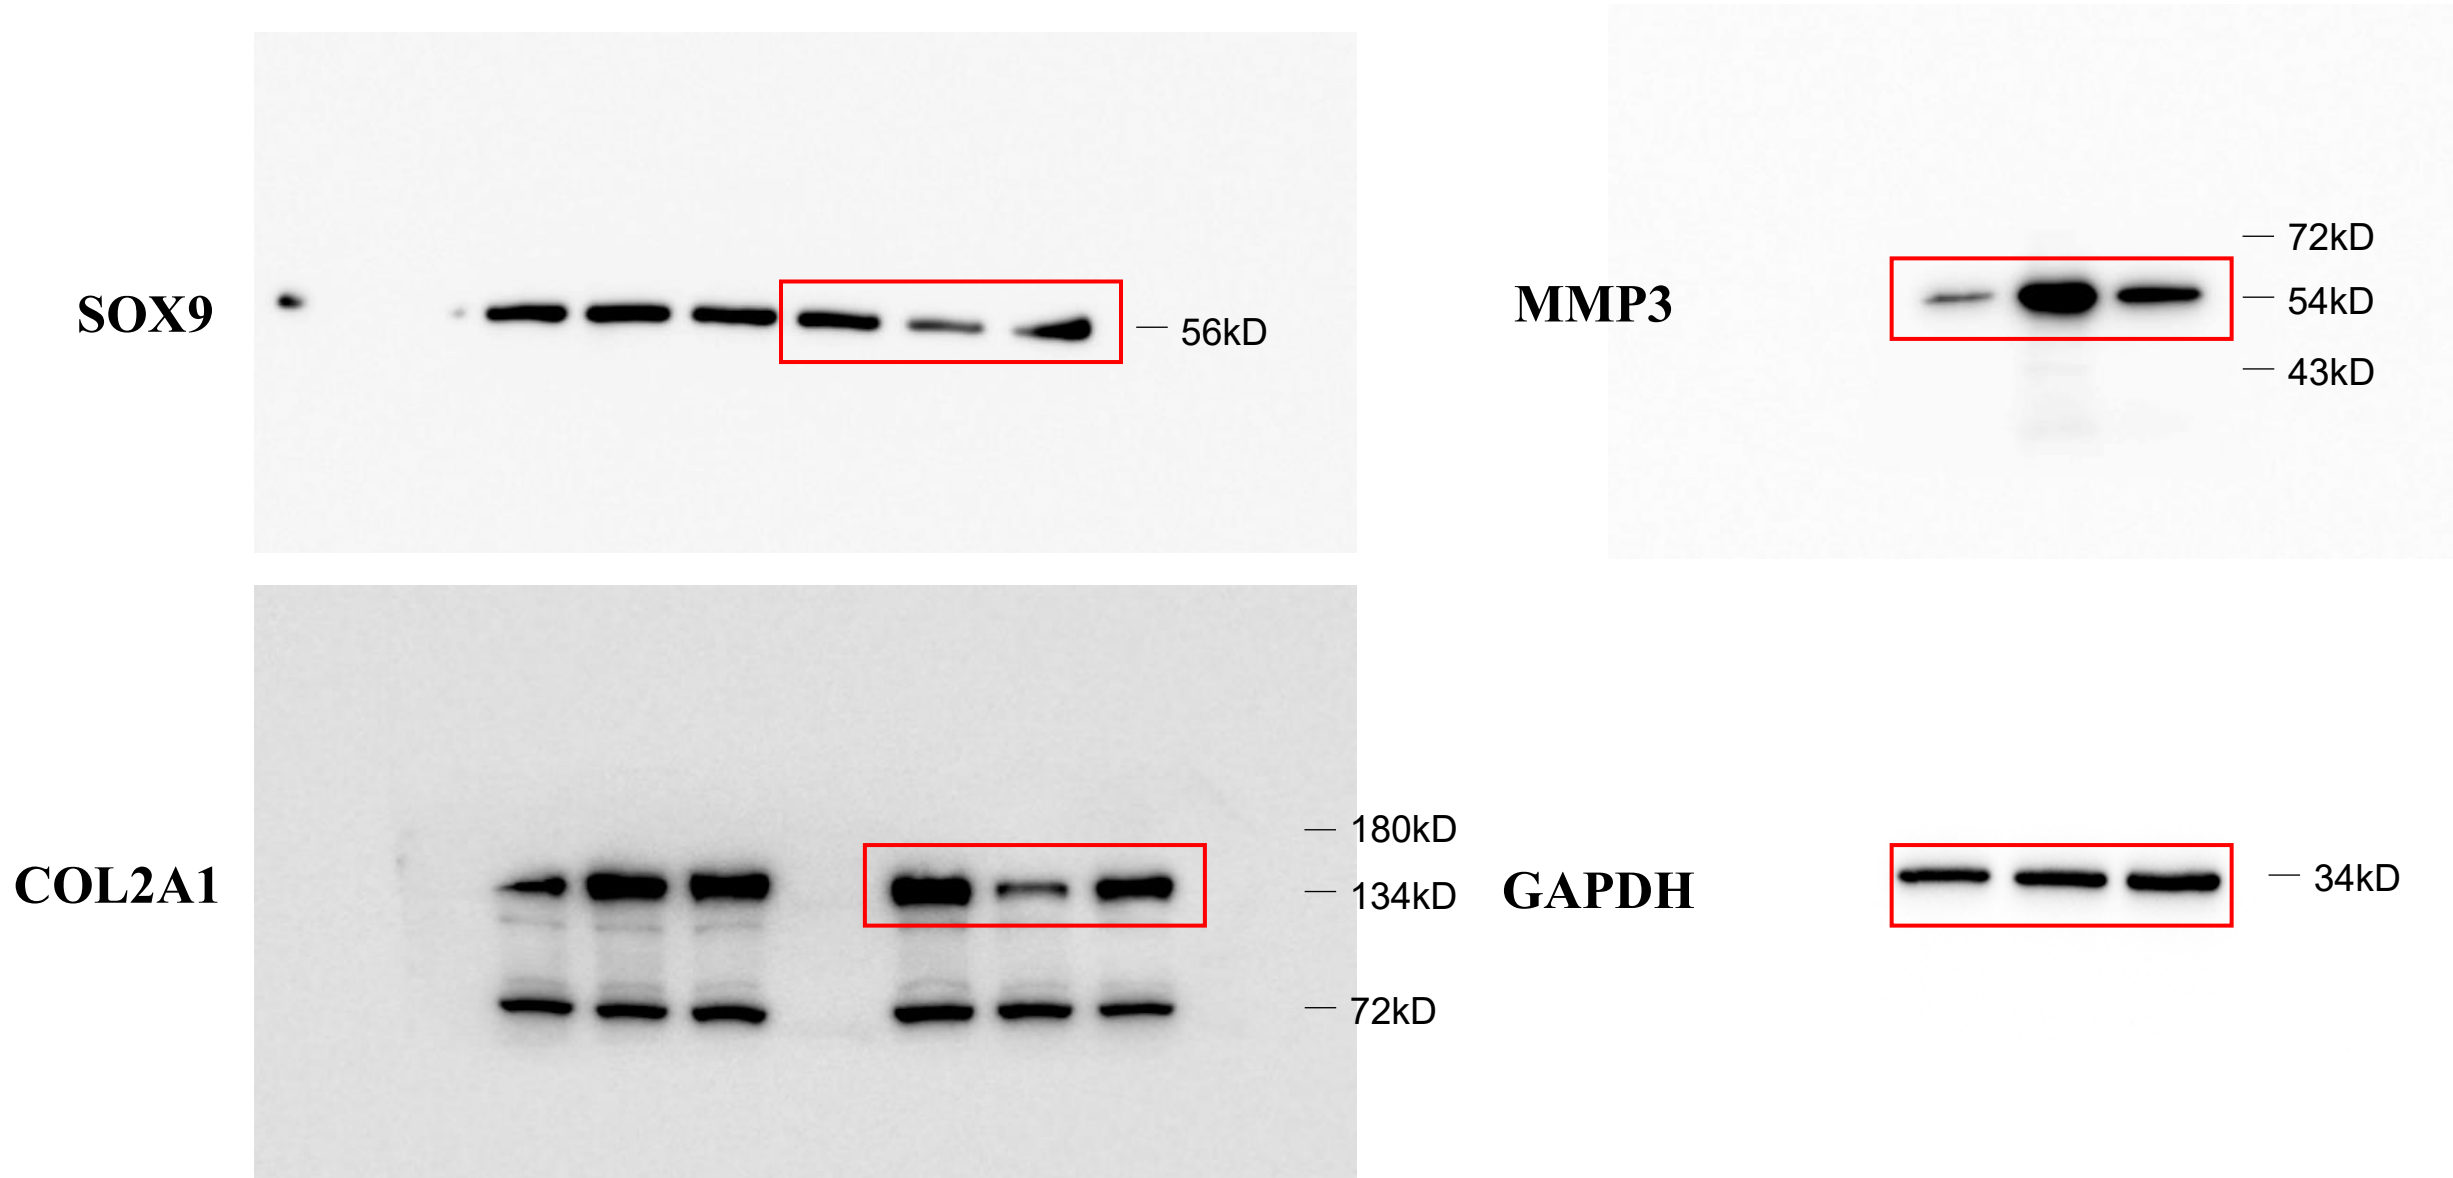

**Figure 4E**

**MMP13**

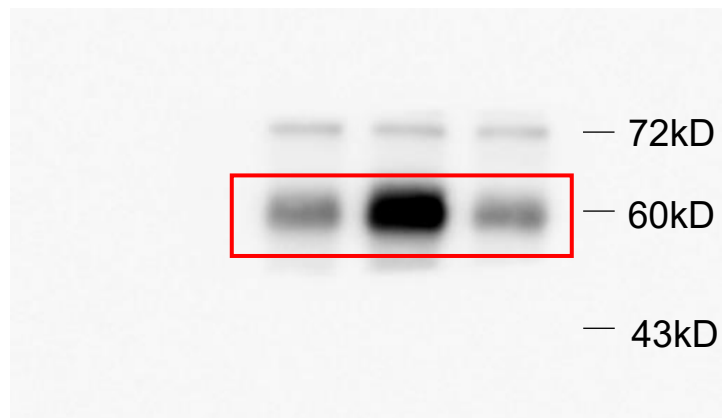

**NOS2**

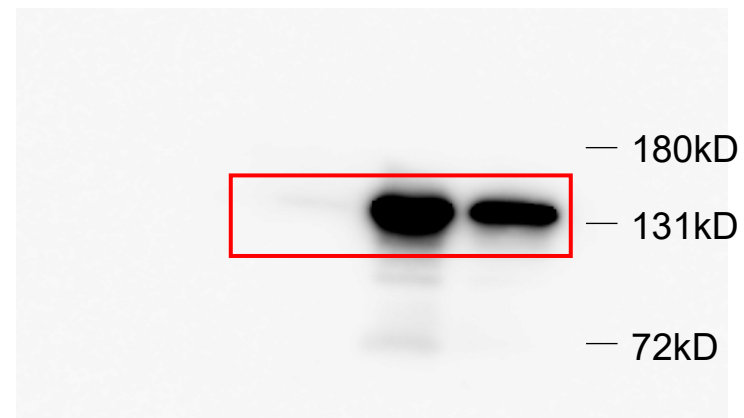

**ADAMTS5**

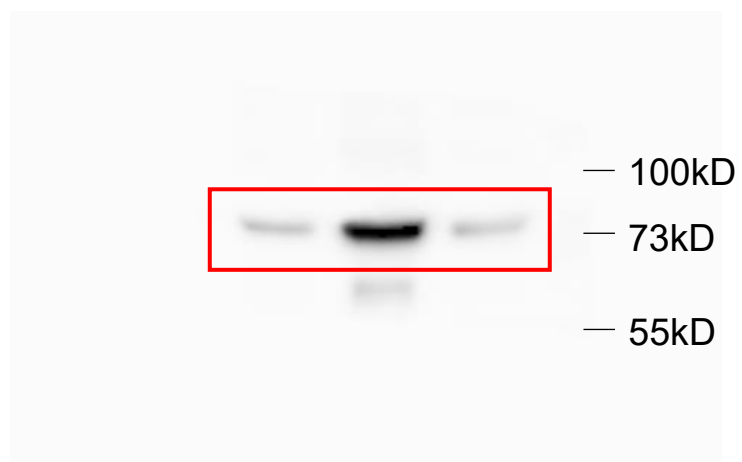

**GAPDH**

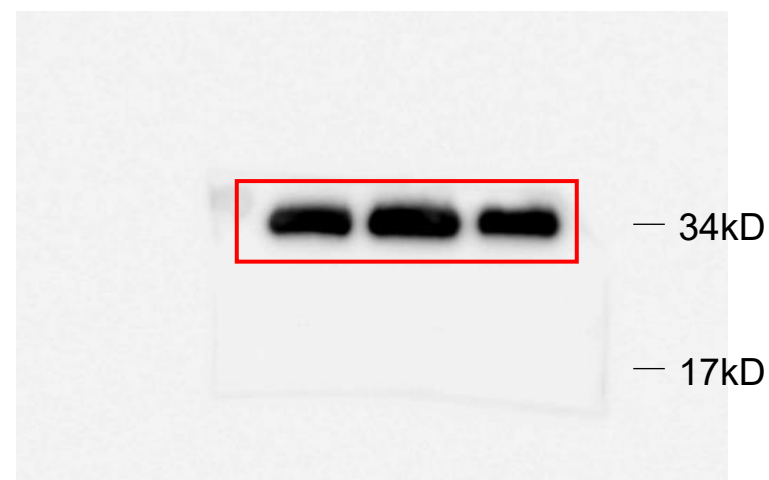

**Figure 5L**

**MMP3**

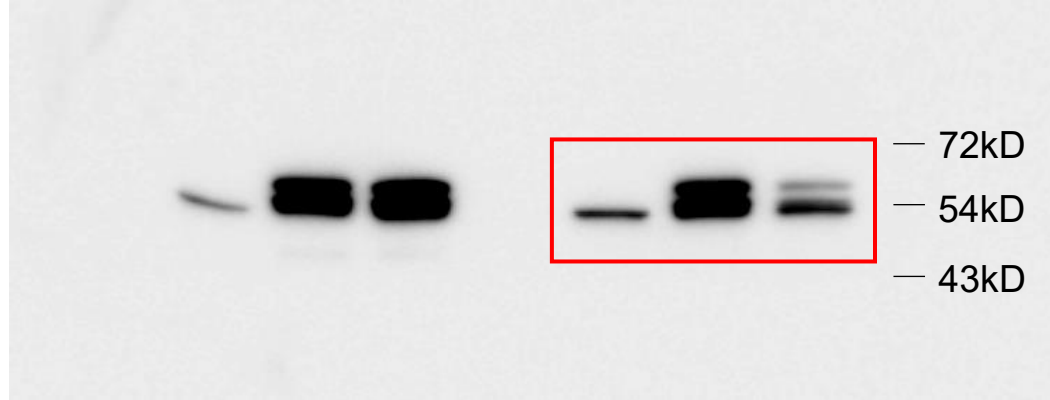

**MMP13**

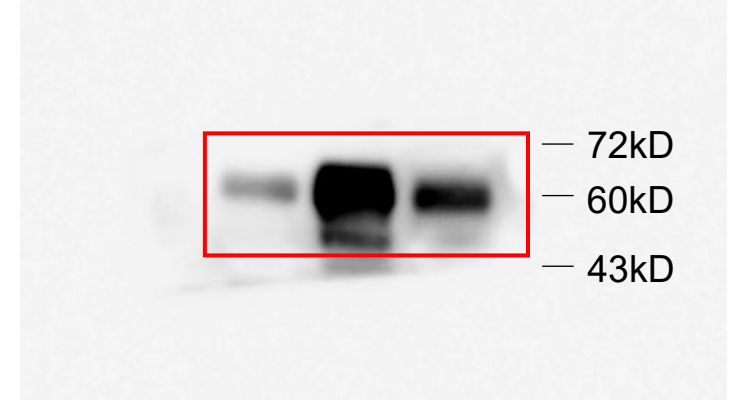

**NOS2**

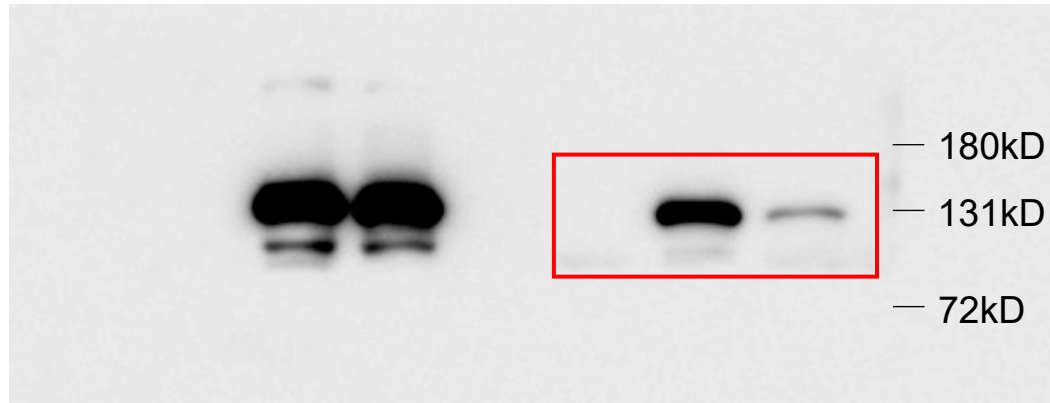

**ADAMTS5**

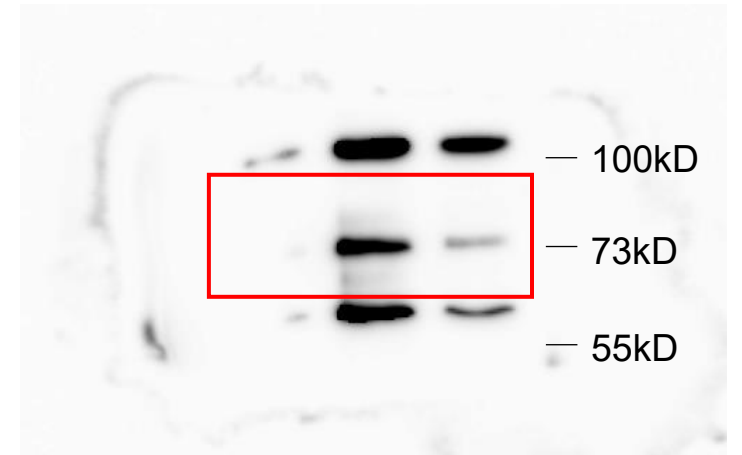

**GAPDH**

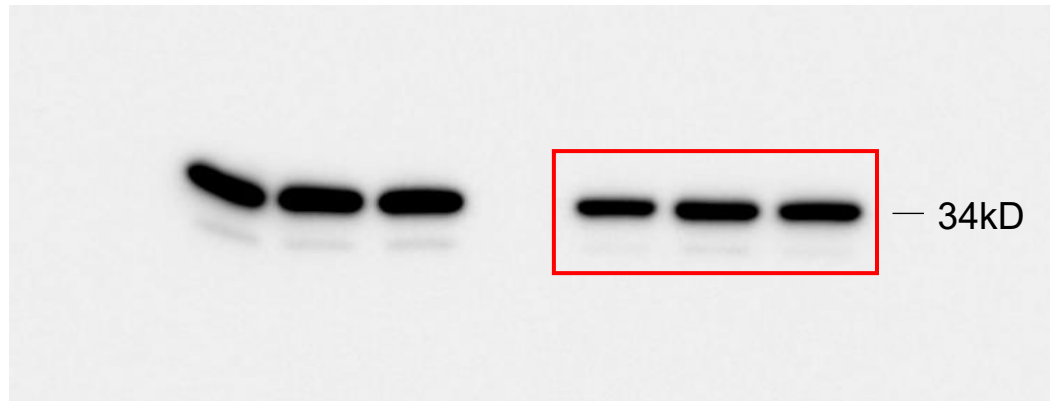

**GAPDH**

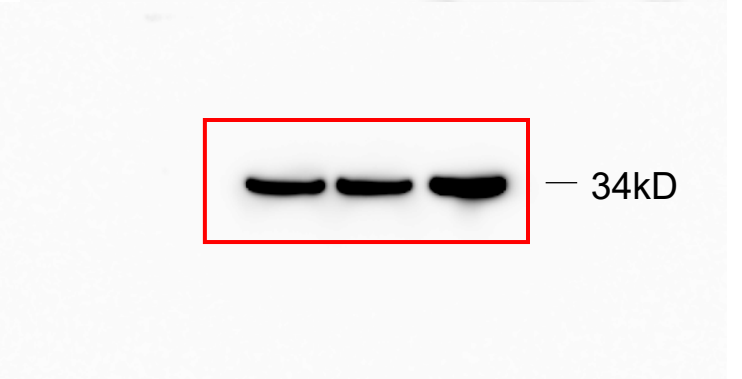

**Figure 6C**

**Nuclear p65**

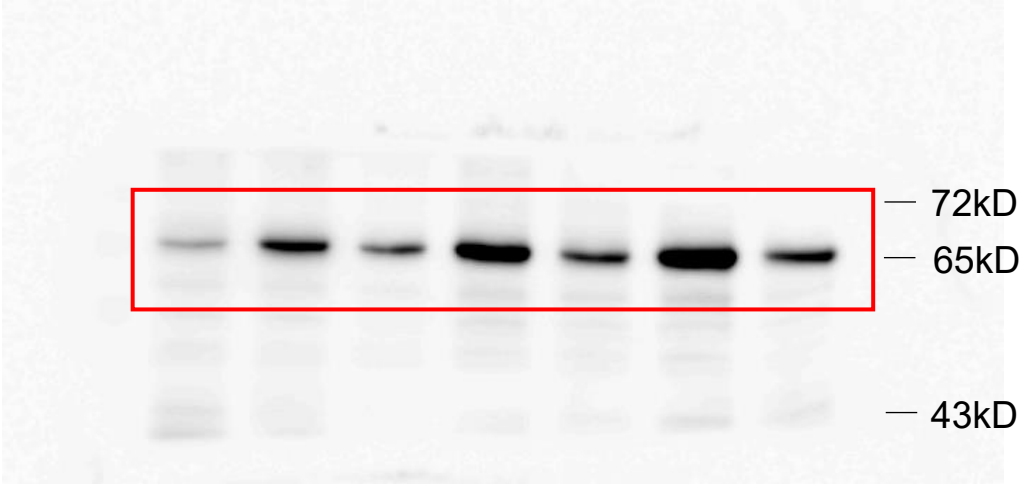

**Lamina/c**

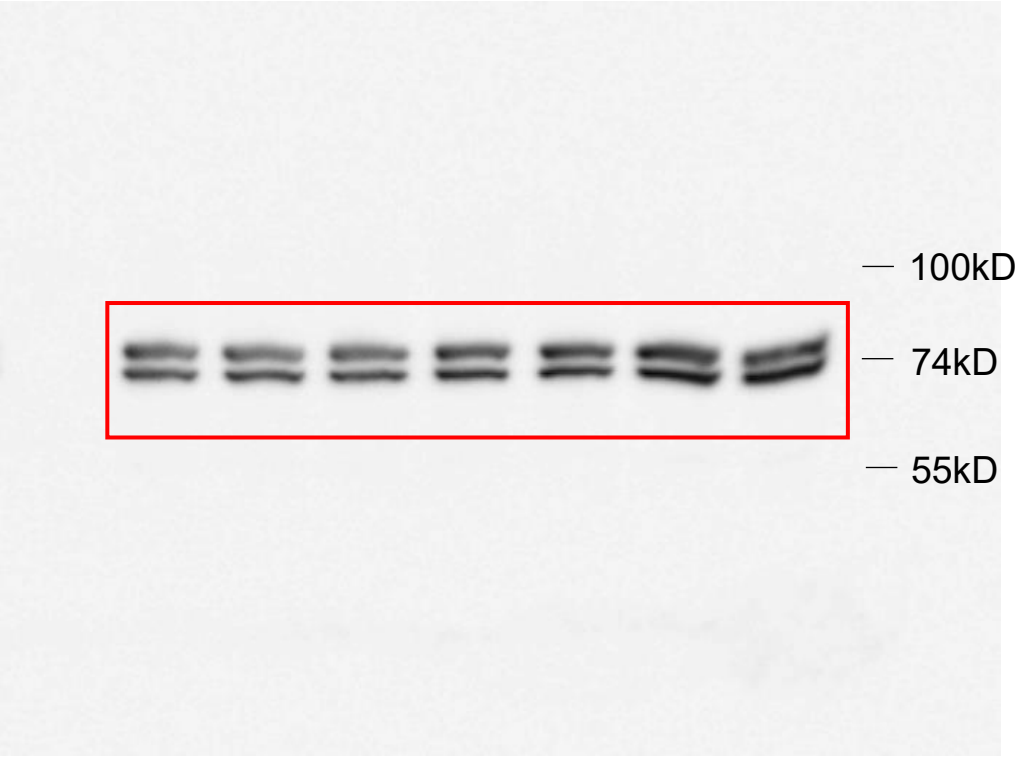

**Figure 6C**

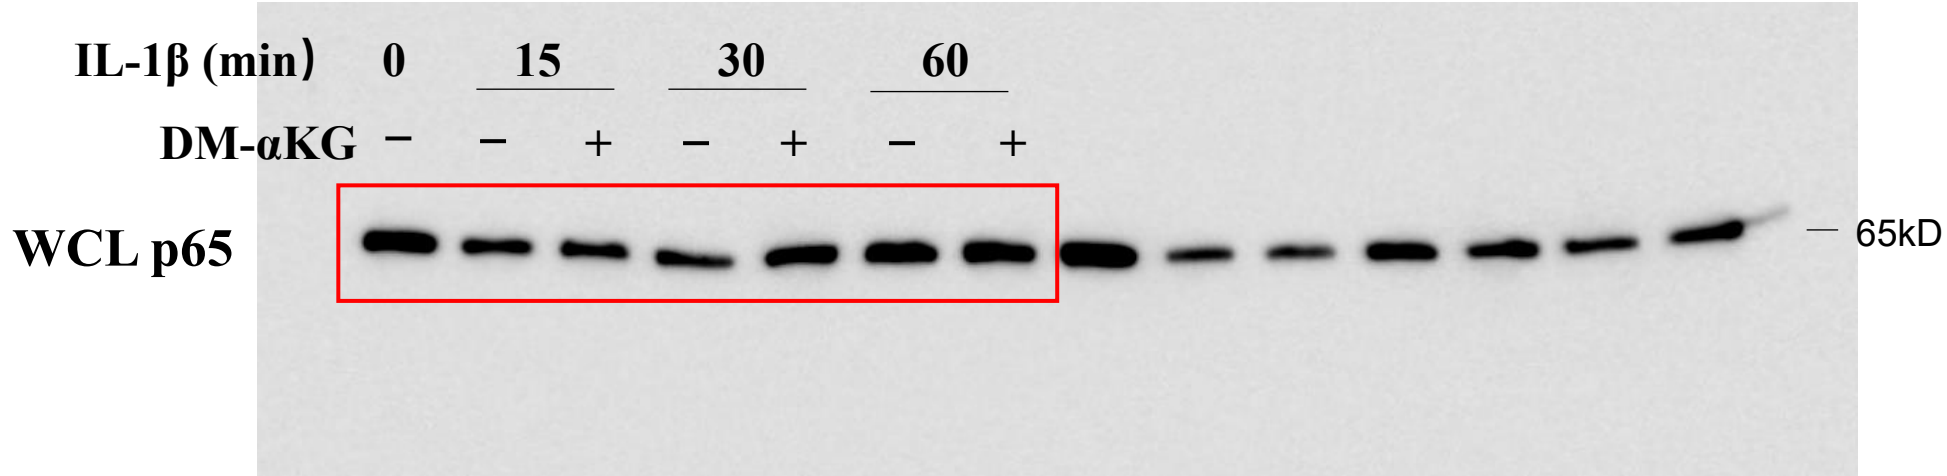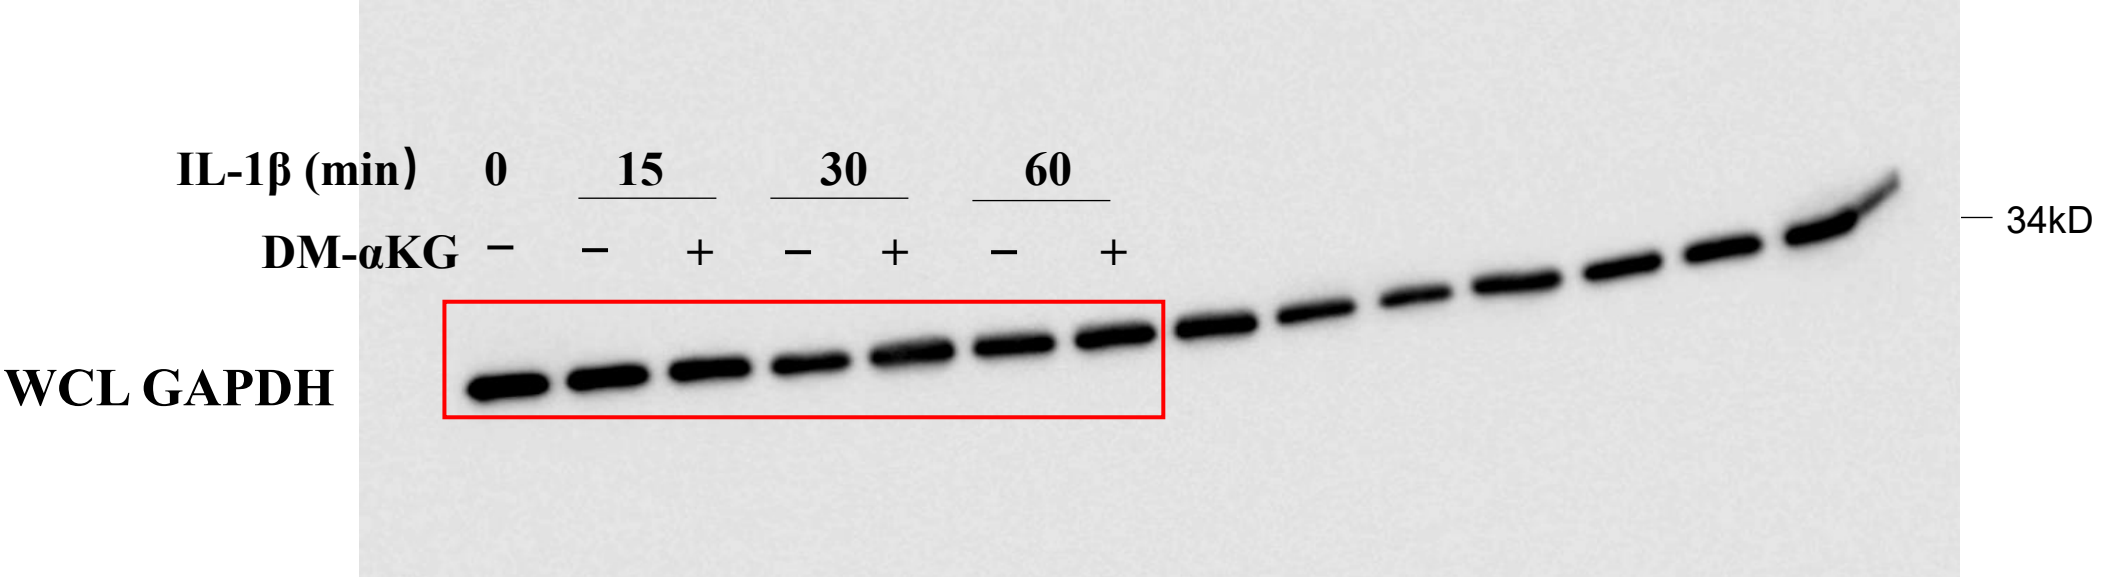

# Figure 6C

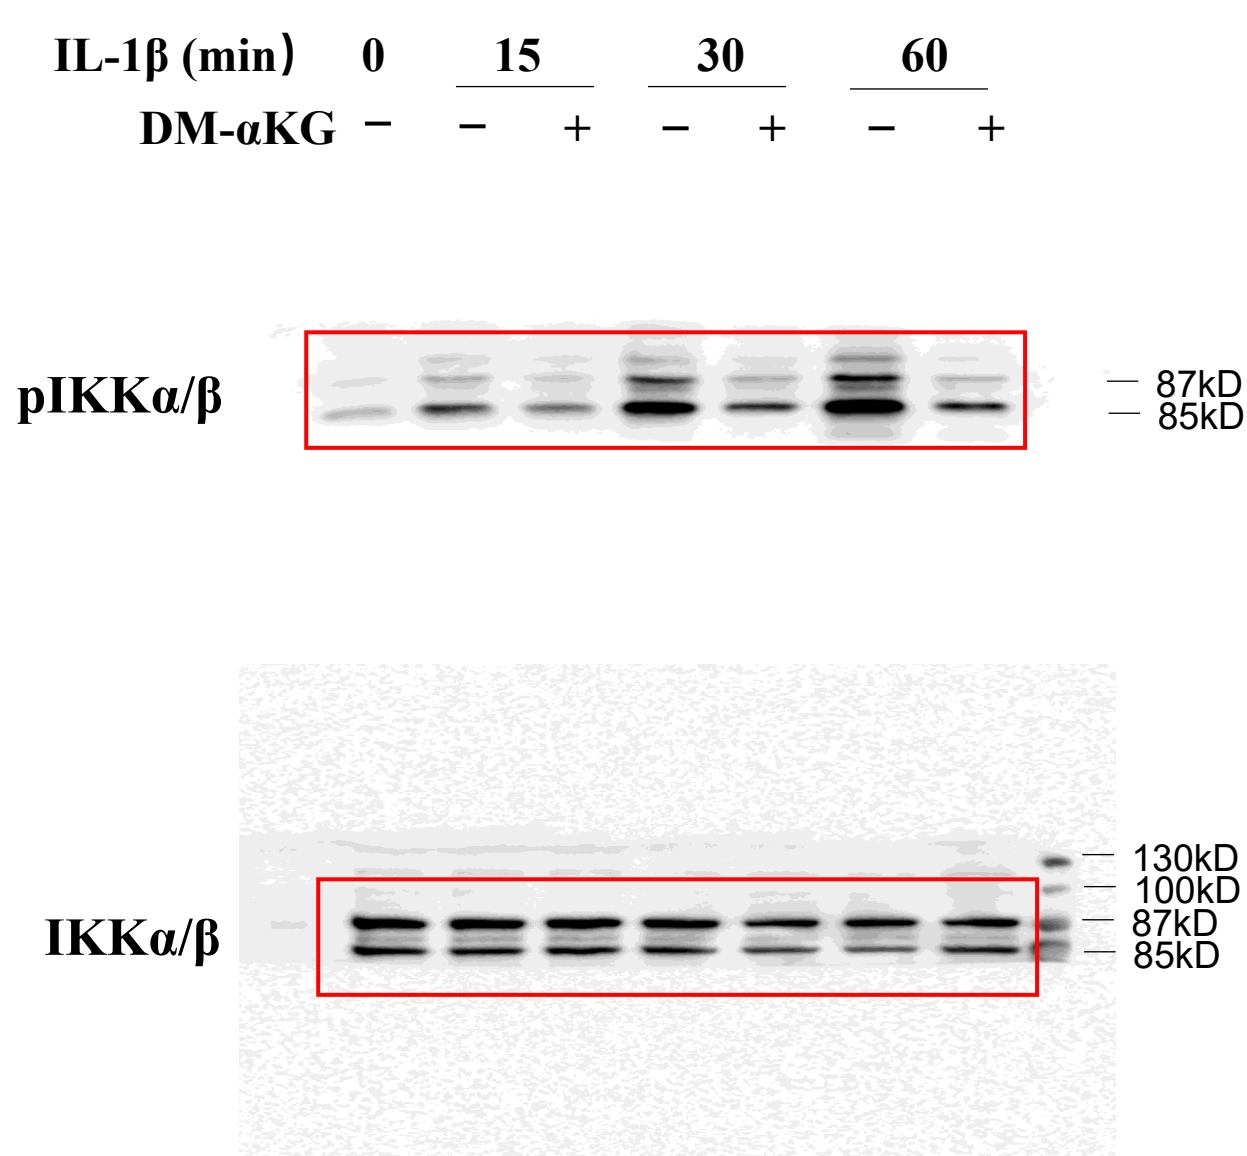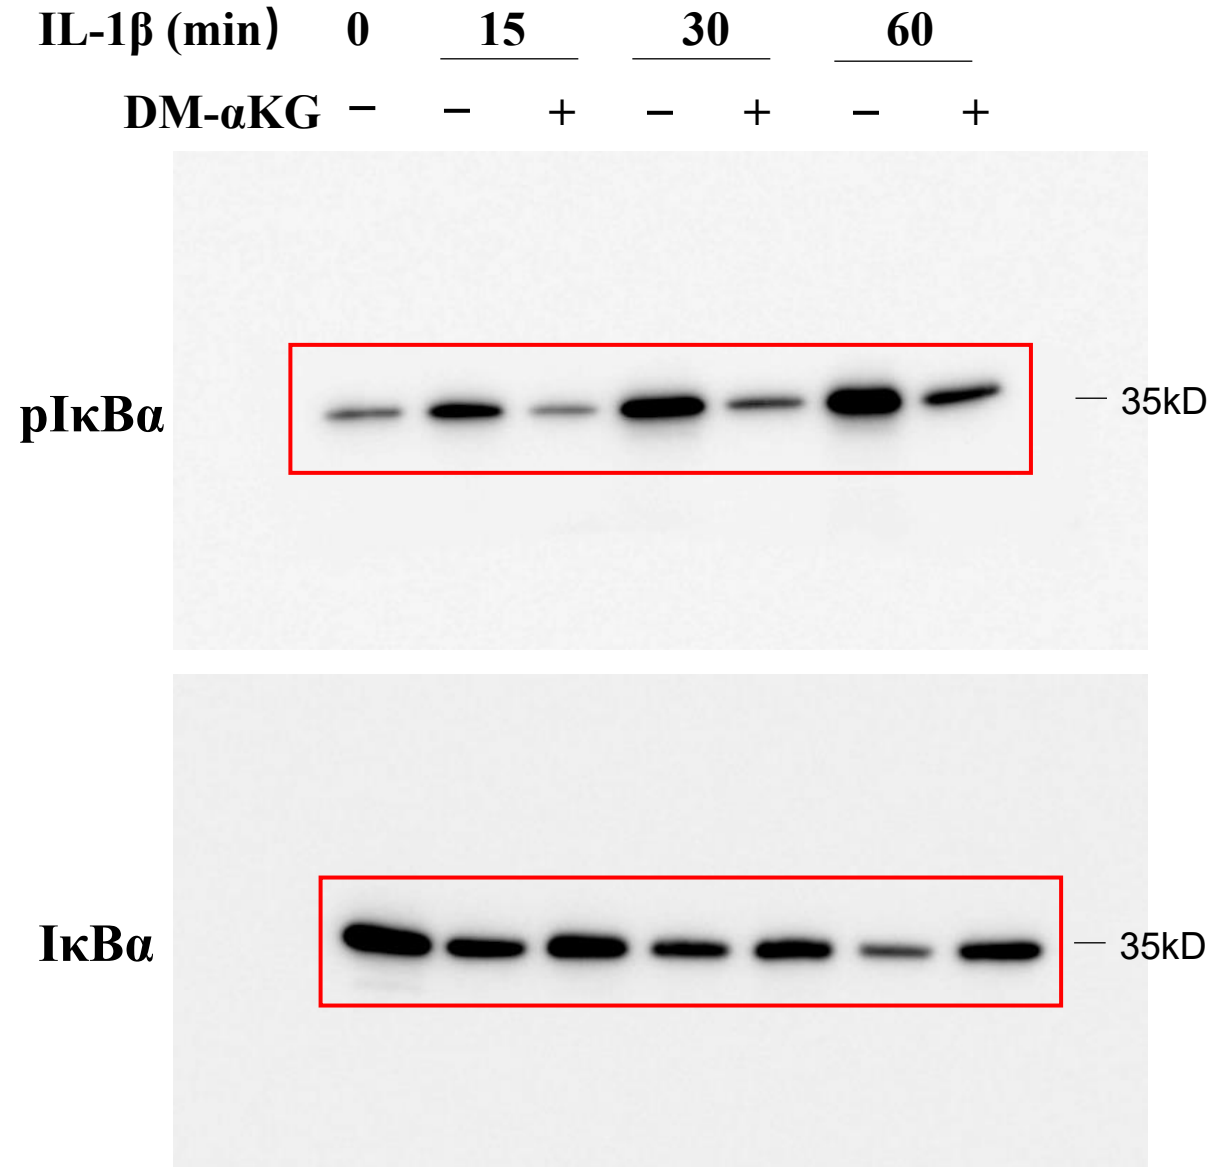

**Figure 6C**

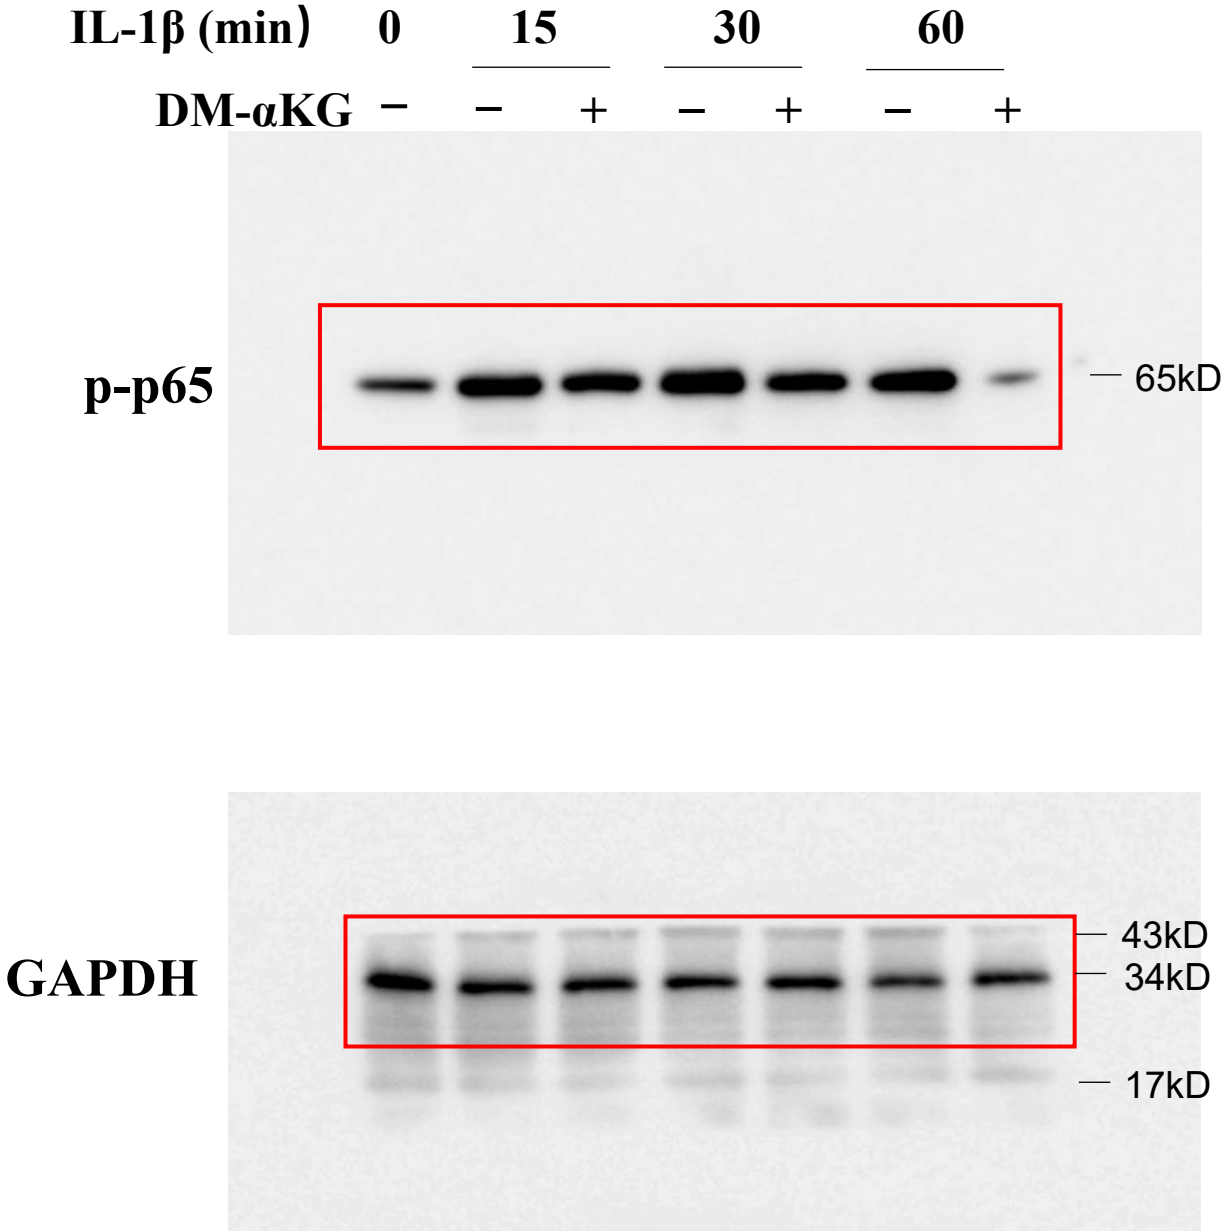

# Figure 6D

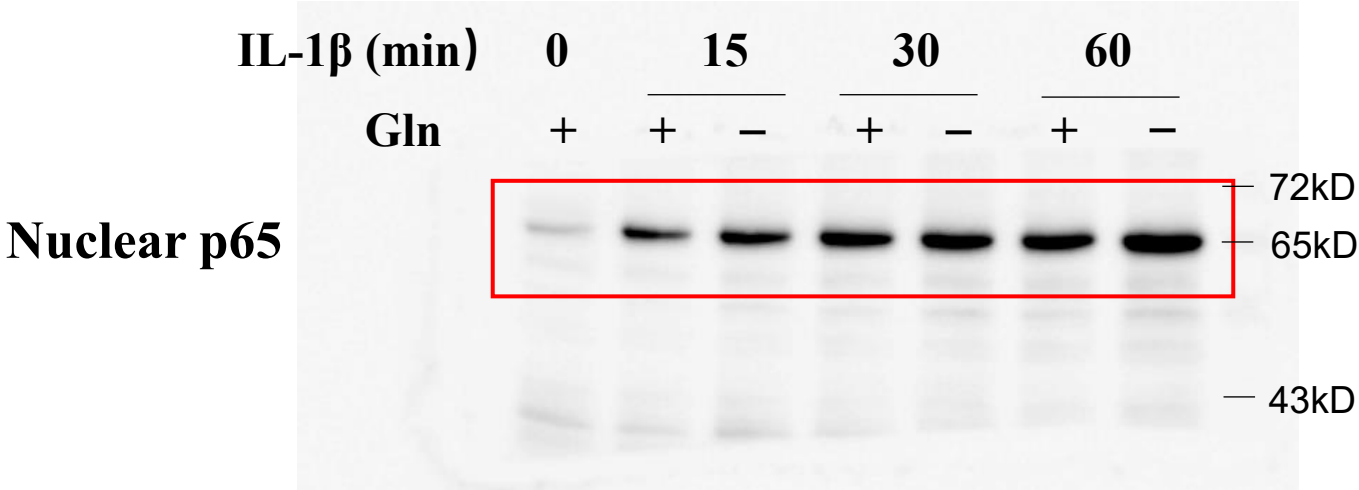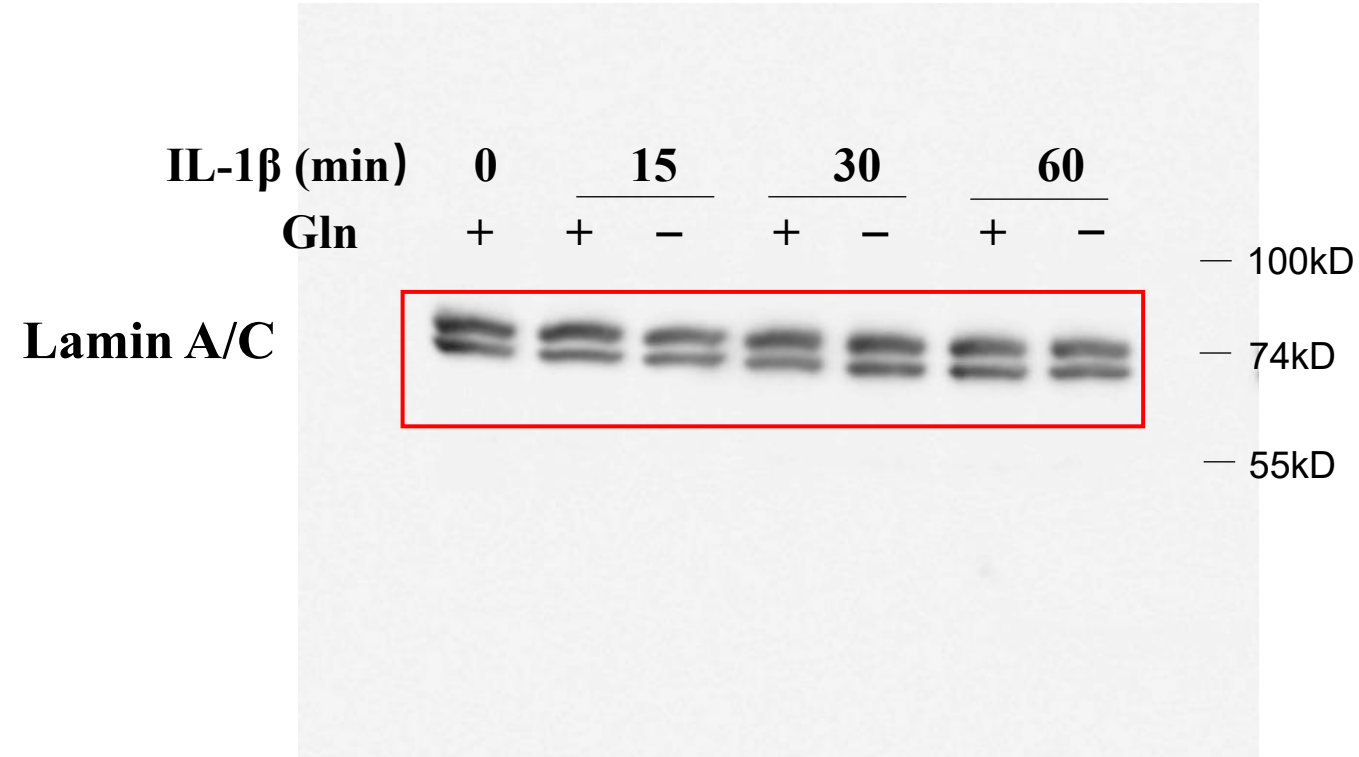

# Figure 6D

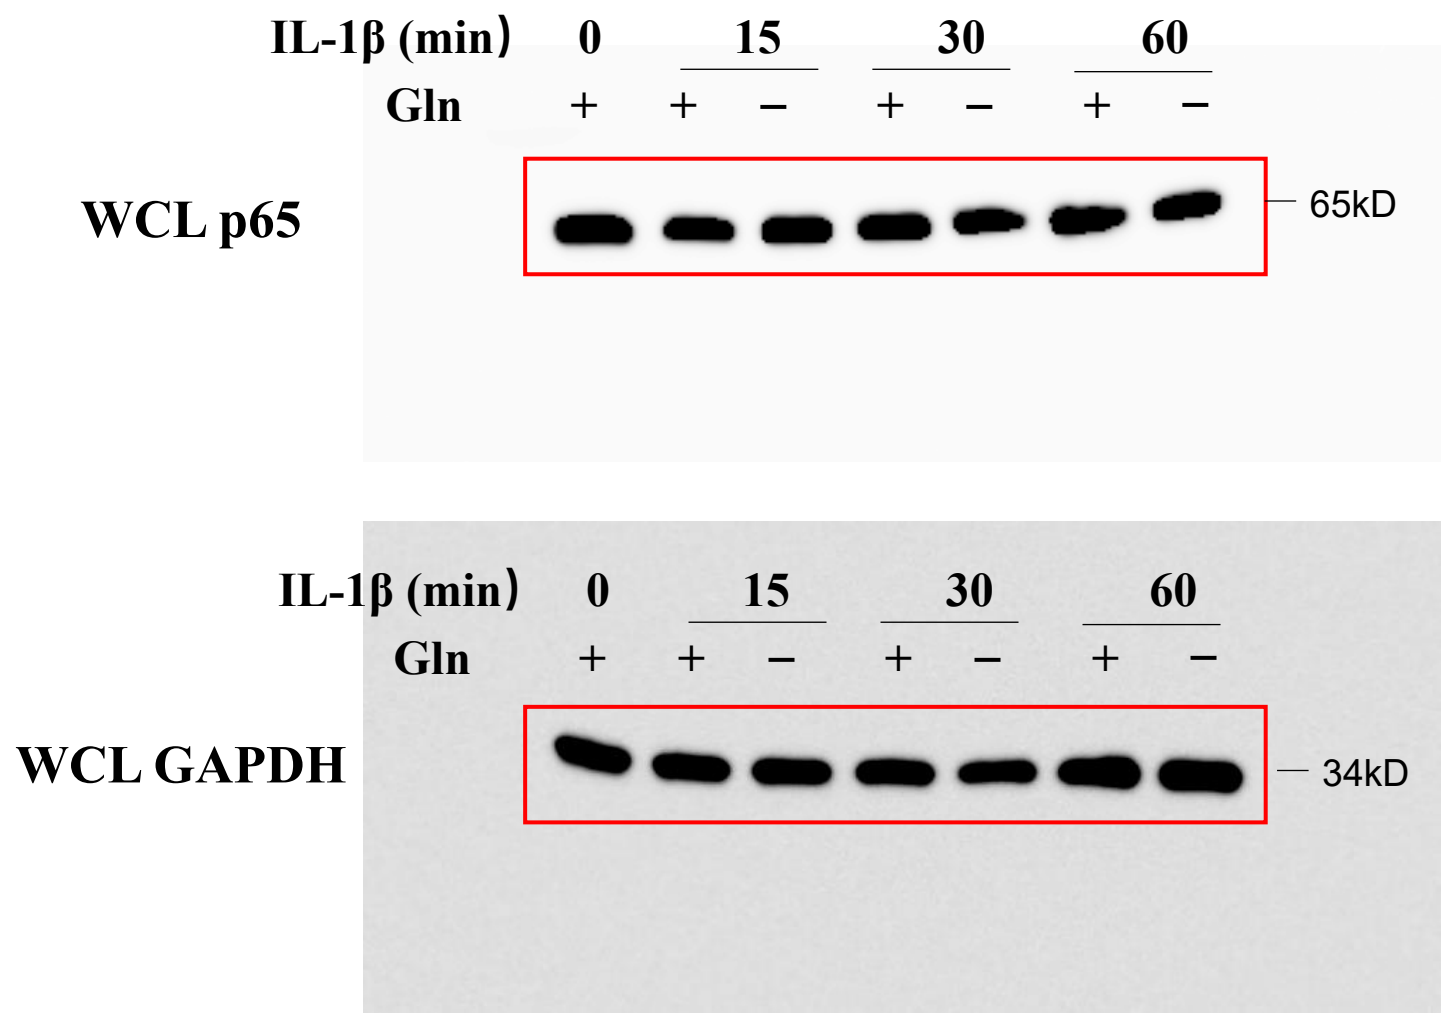

# Figure 6D

IL-1 $\beta$  (min)    0            15            30            60  
Gln            +            + -            + -            + -

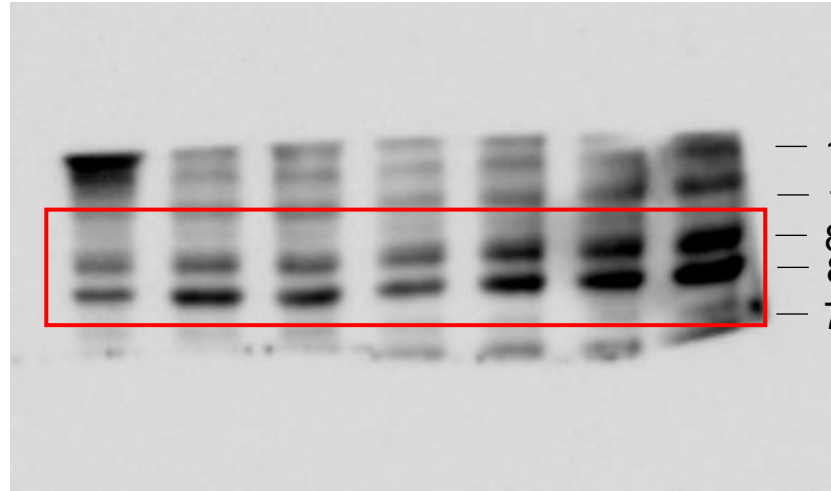

IL-1 $\beta$  (min)    0            15            30            60  
Gln            +            + -            + -            + -

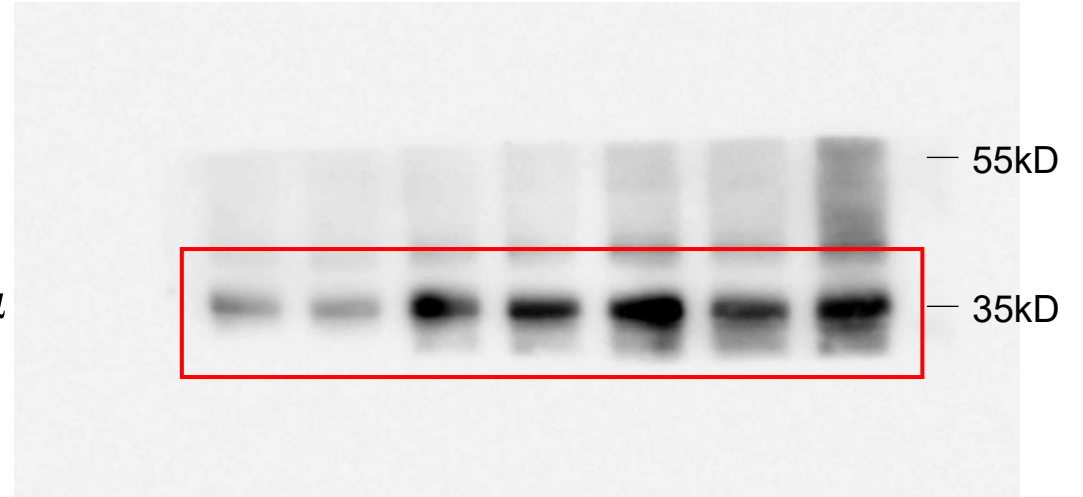

pIKK $\alpha/\beta$

pI $\kappa$ B $\alpha$

IKK $\alpha/\beta$

I $\kappa$ B $\alpha$

I $\kappa$ B $\alpha$

**Figure 6D**

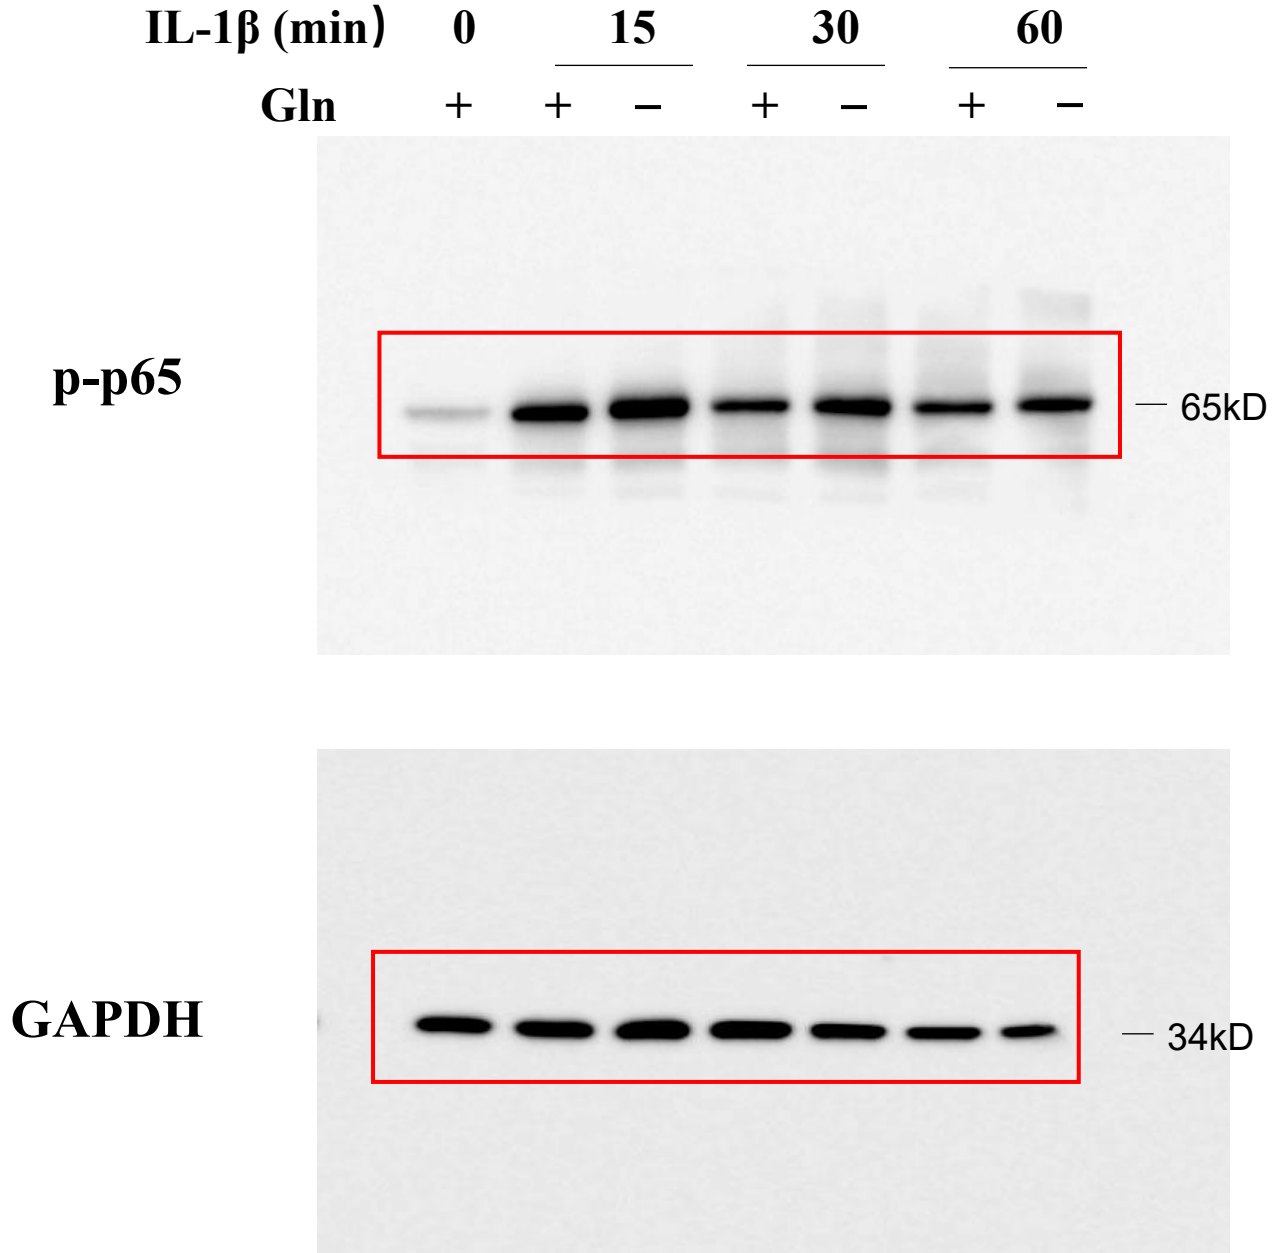

**Figure 6E**

**Nuclear p65**

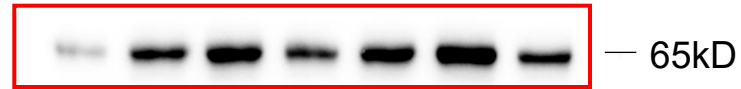

**WCL  
p65**

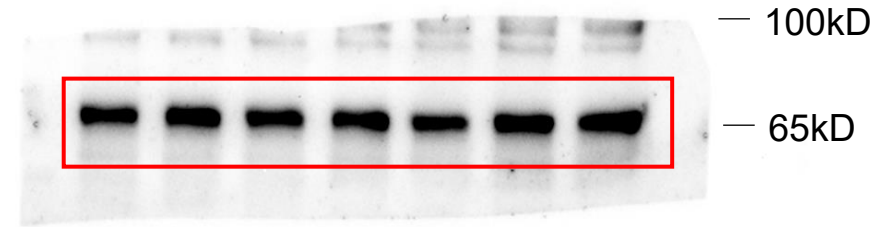

**Lamin A/C**

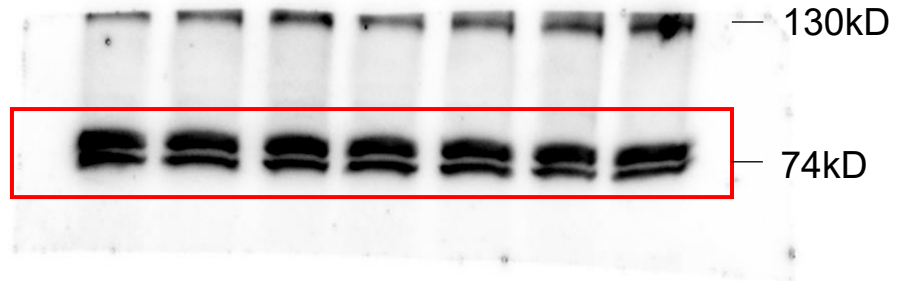

**GAPDH**

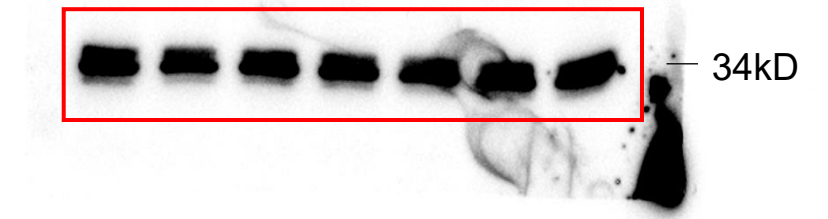

**Figure 6E**

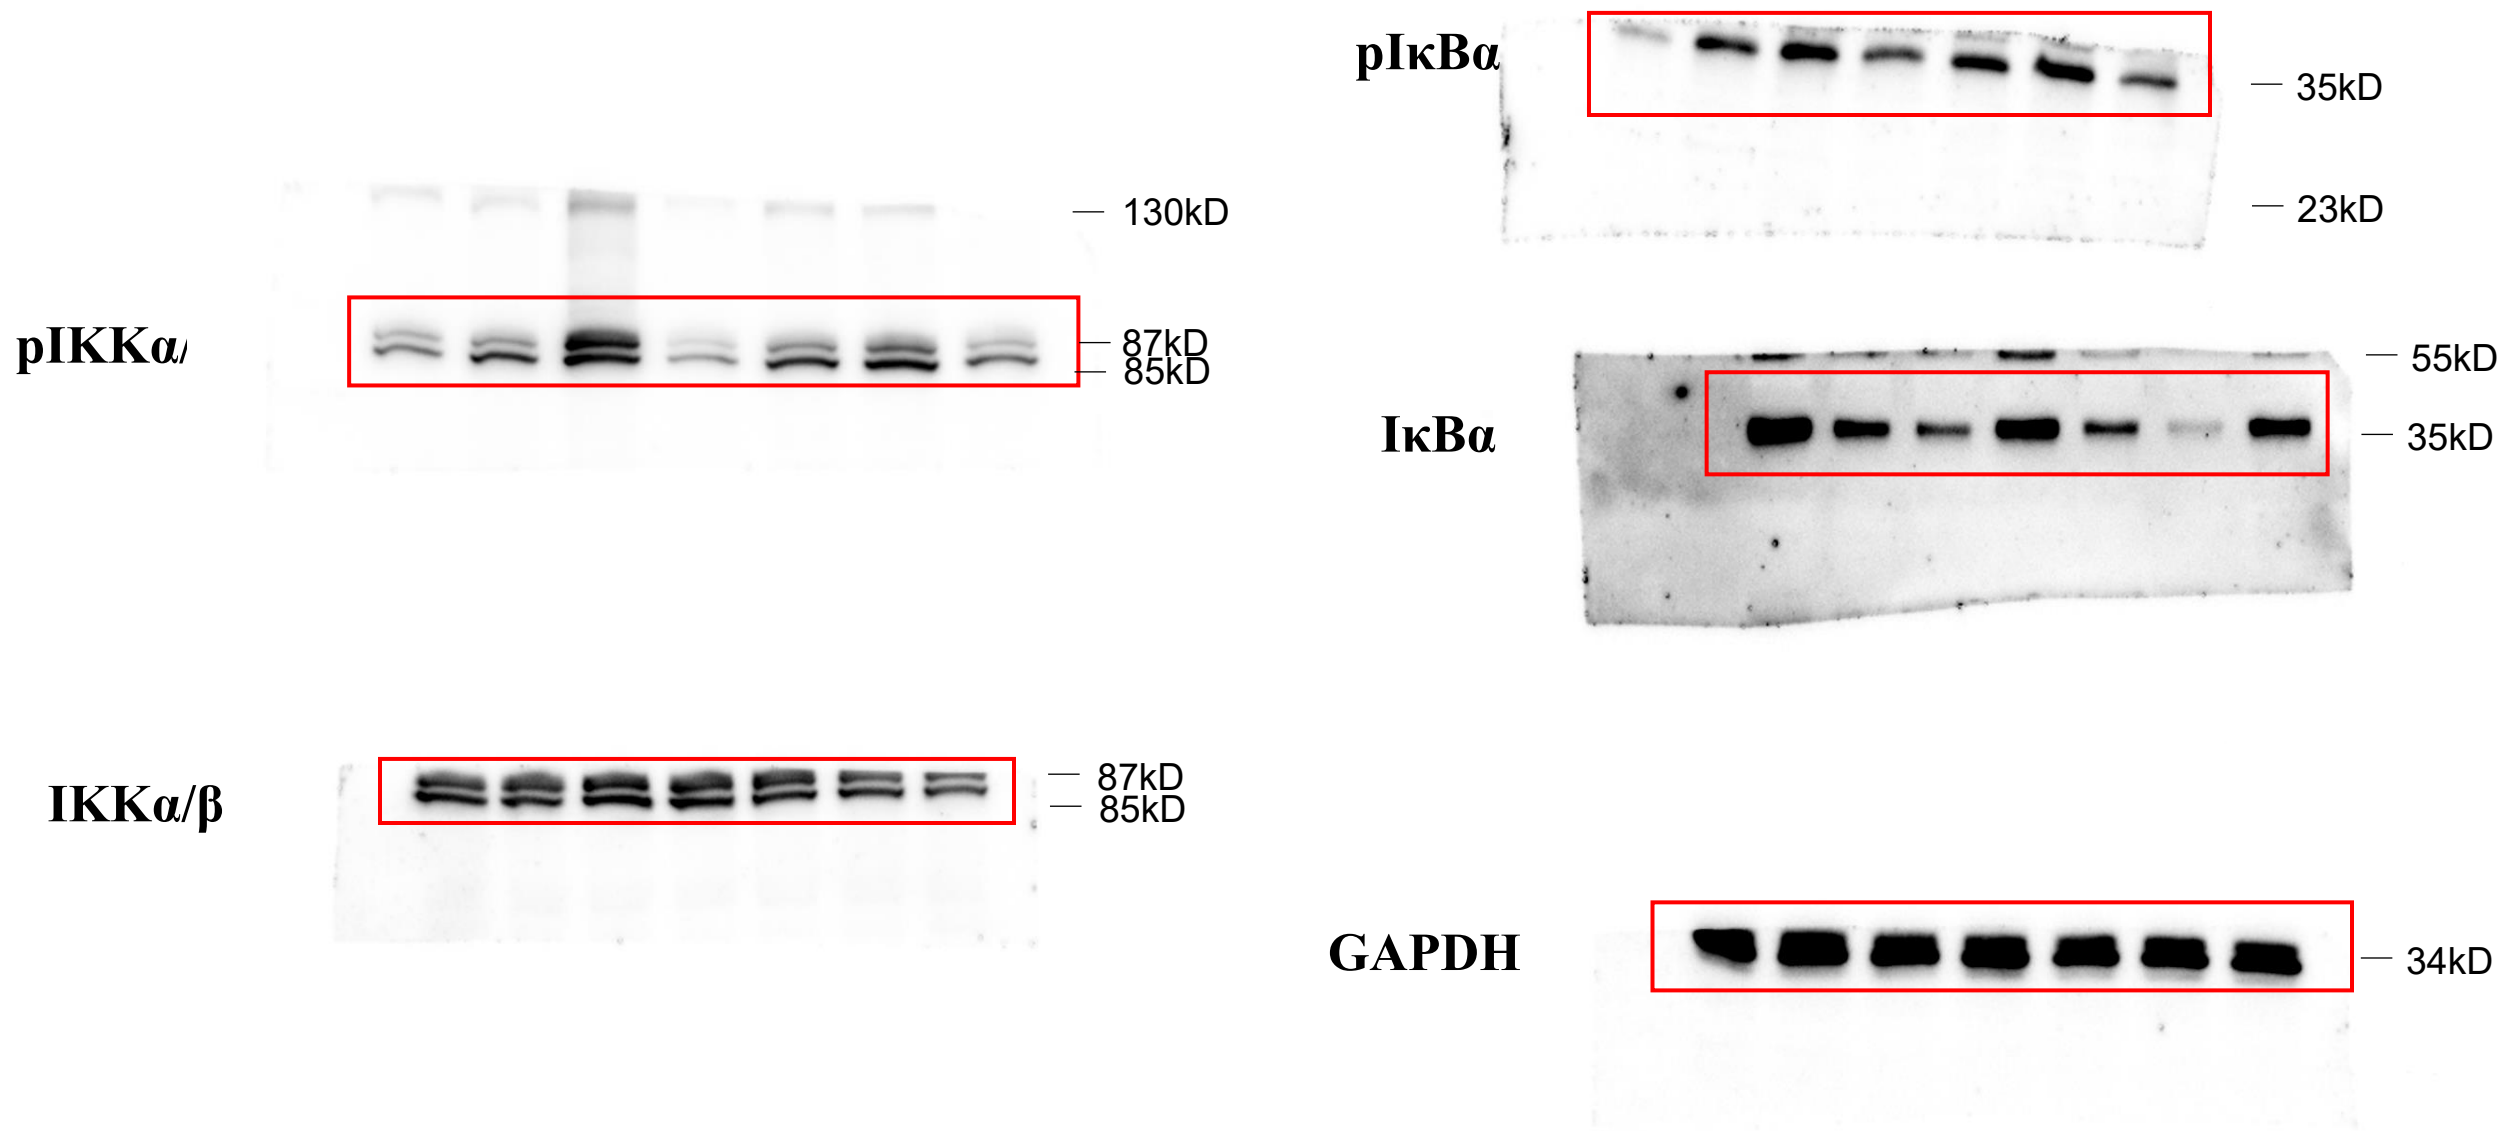

**Figure 6H**

**H3K27me3**  — 17kD

**H3**  — 17kD

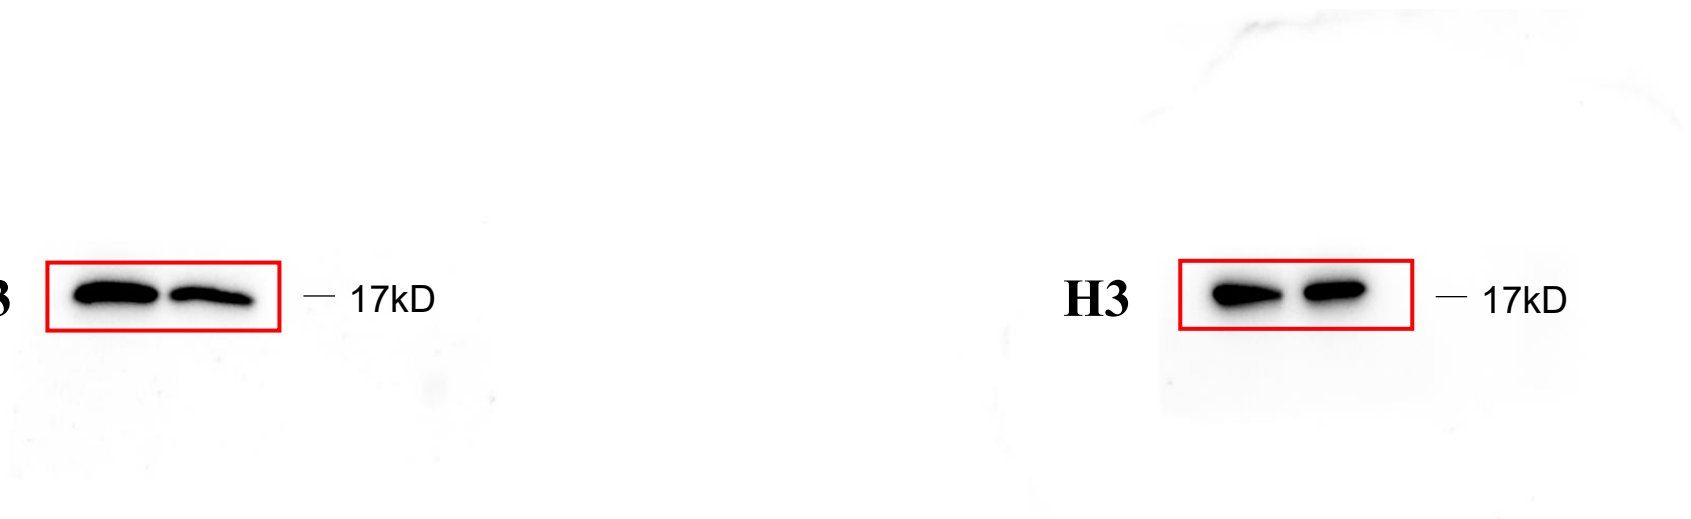

**Figure 7A**

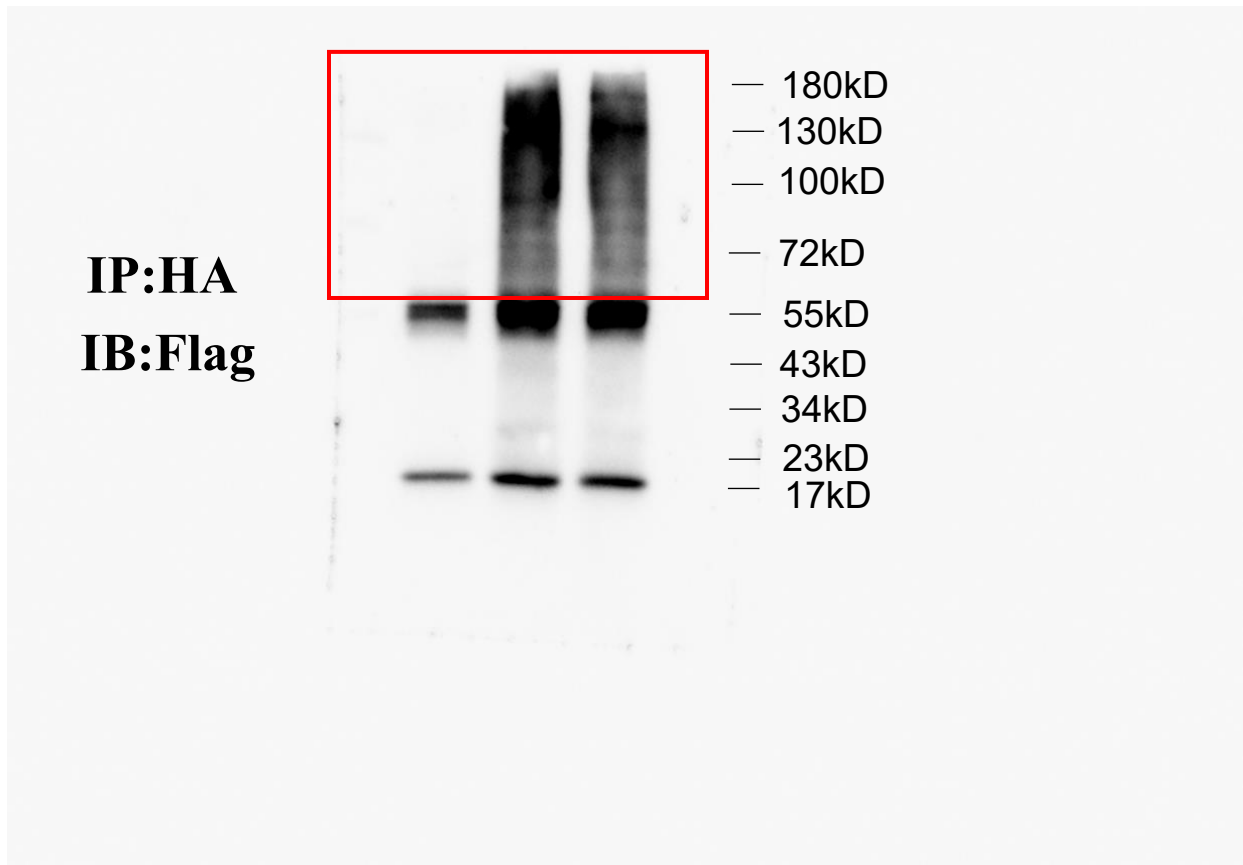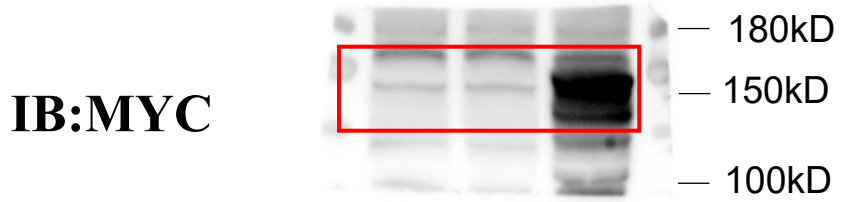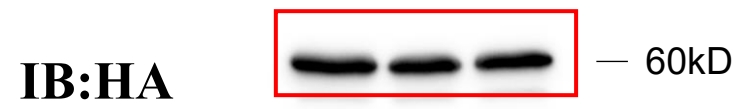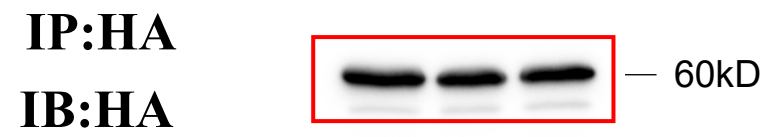

**Figure 7C**

**IP:TRAF6**  
**IB:K63-Ub**

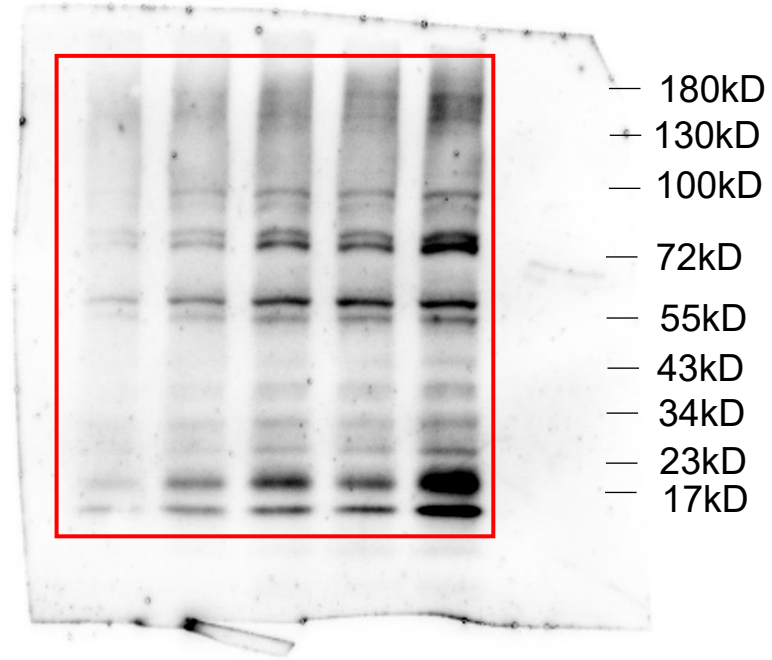

**IP:TRAF6**  
**IB:TRAF6**

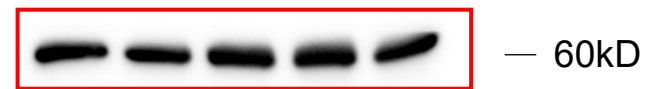

**Figure 7D**

**IP:TRAF6**  
**IB:K63-Ub**

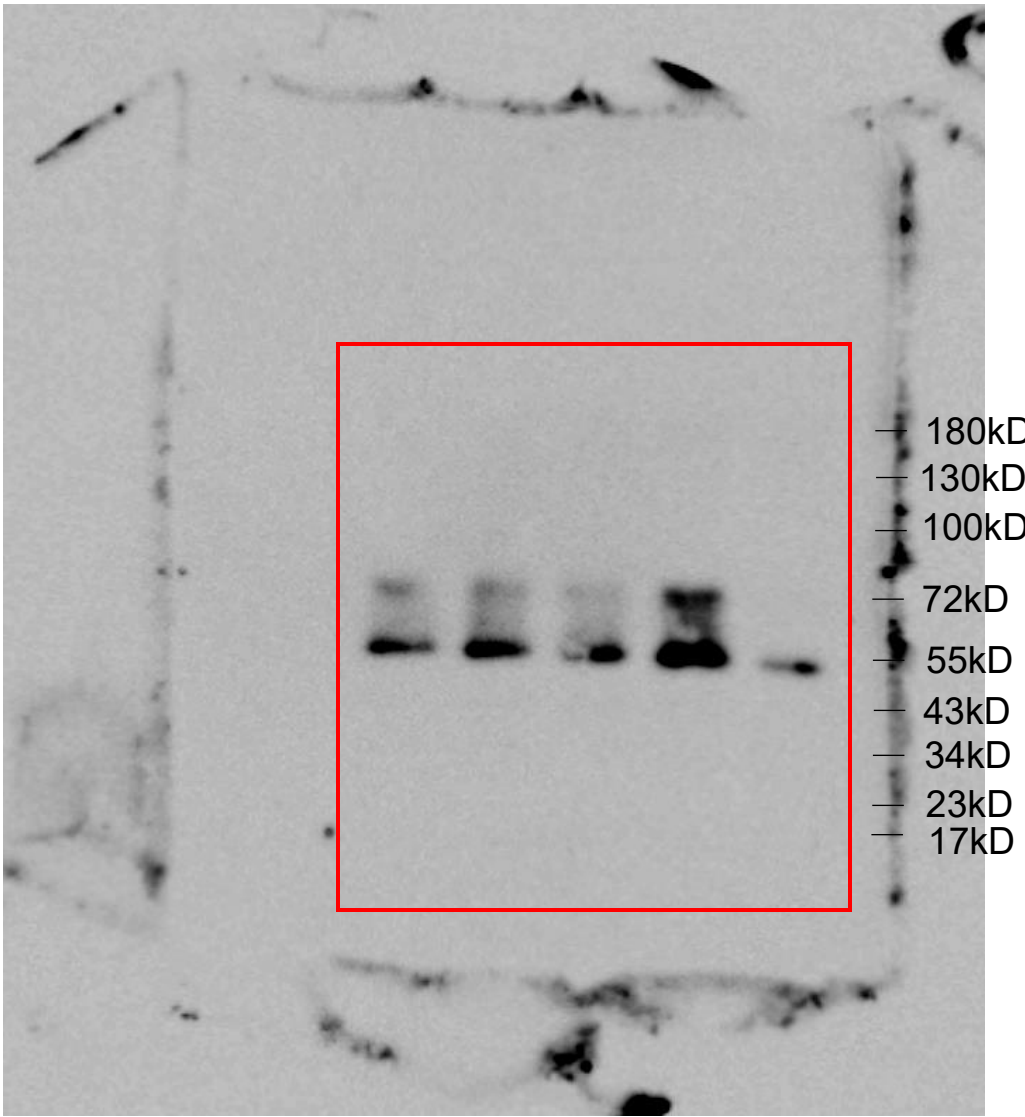

**IP:TRAF6**  
**IB:TRAF6**

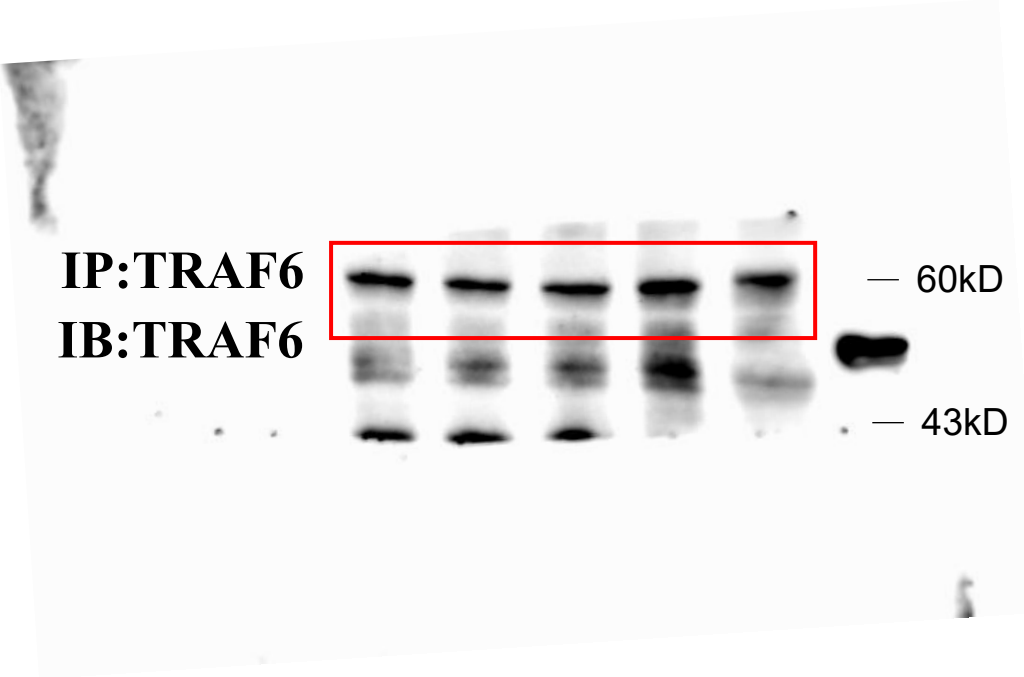

**Figure 7E**

**IP:TRAF6**  
**IB:K63-Ub**

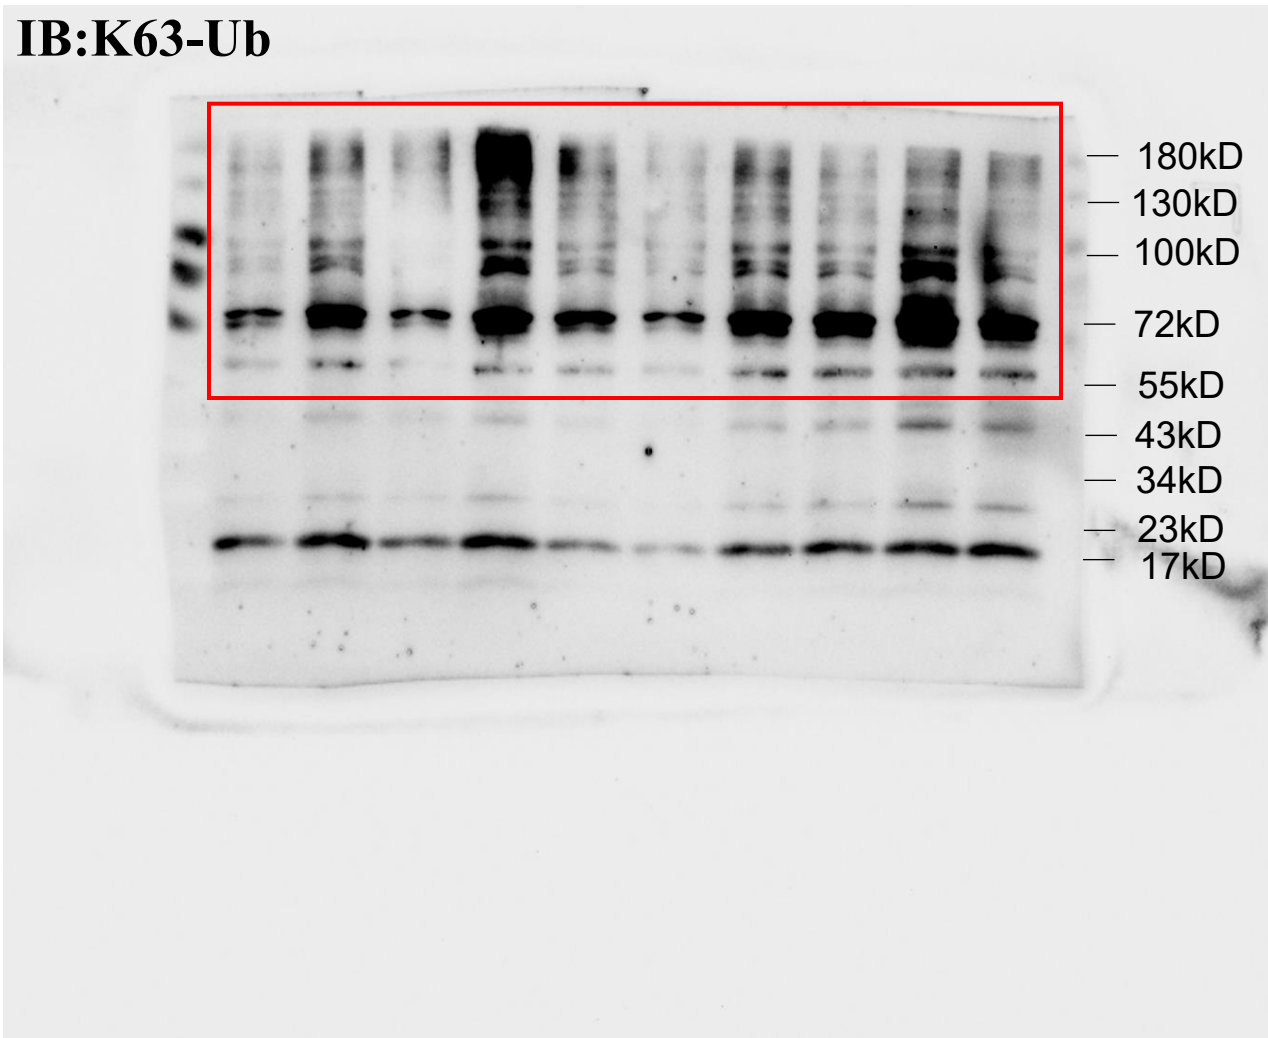

**IP:TRAF6**  
**IB:TRAF6**

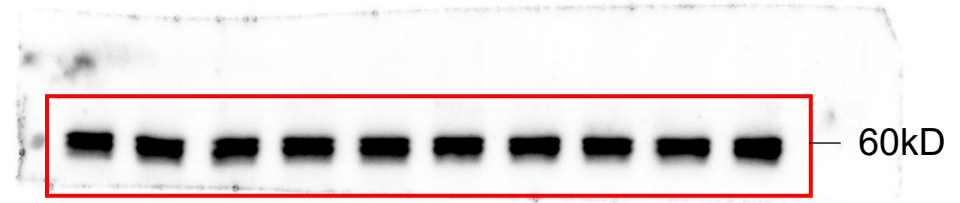

**Figure 7H**

**SOX9**

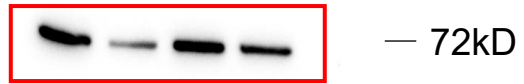

**MMP3**

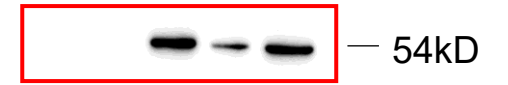

**COL2A1**

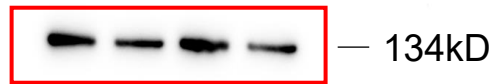

**MMP13**

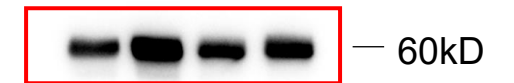

**Figure 7H**

**ADAMTS5**

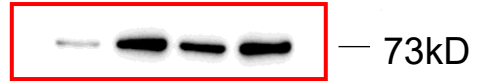

**NOS2**

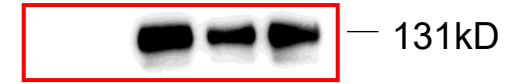

**GAPDH**

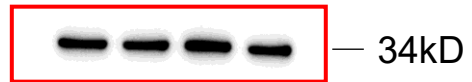

# SFigure 3B

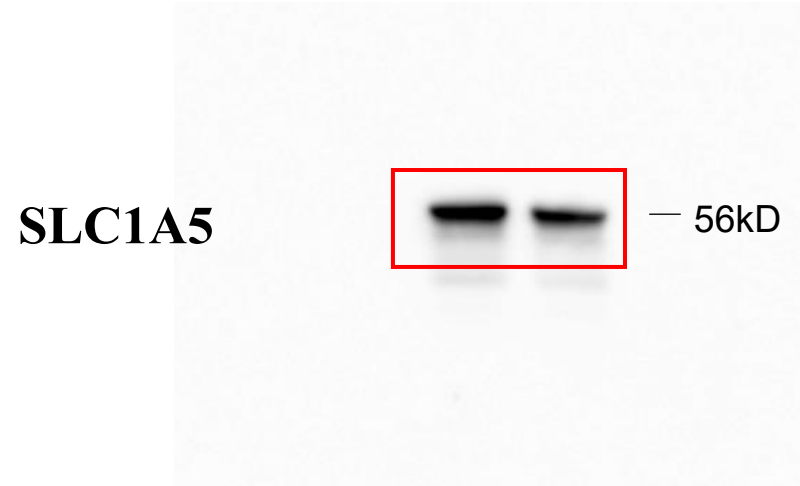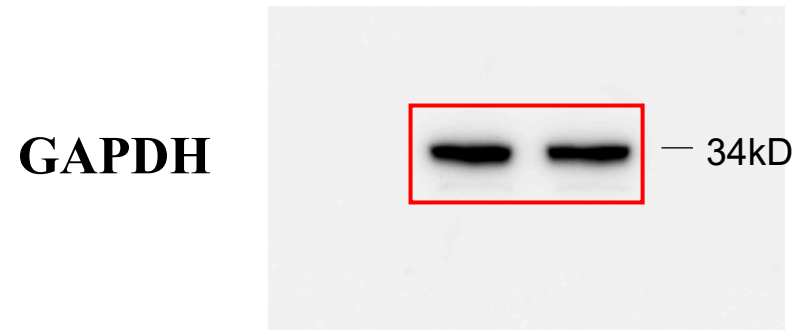

# SFigure 3E

**SOX9**

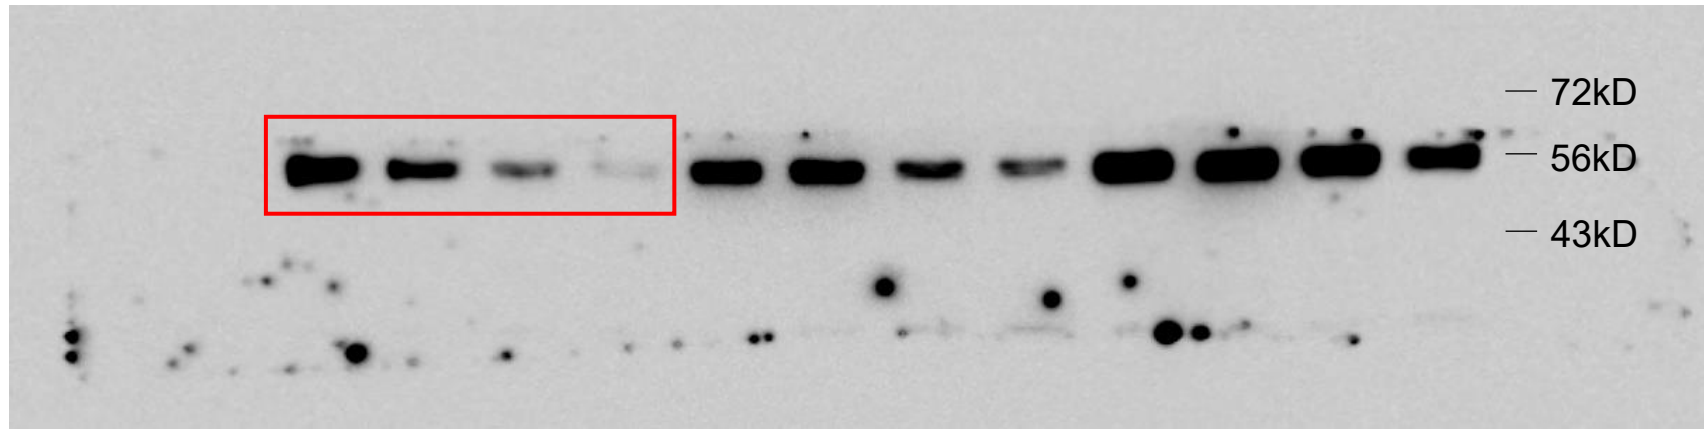

**MMP13**

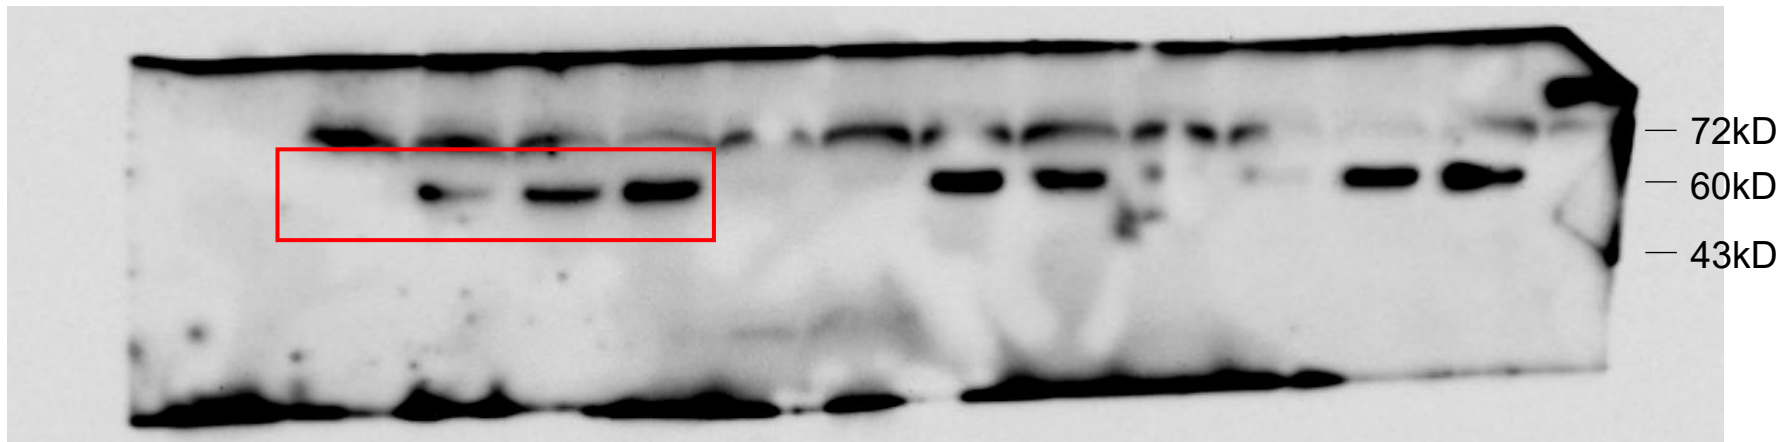

**GAPDH**

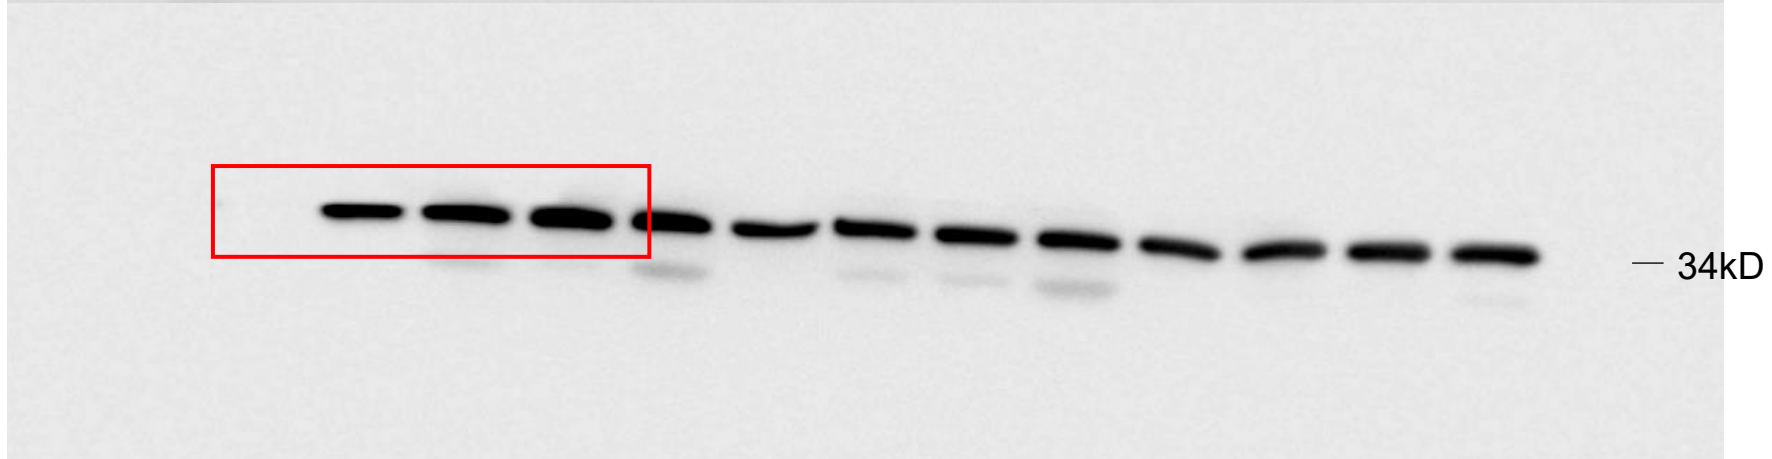

# Figure 3E

**COL2A1**

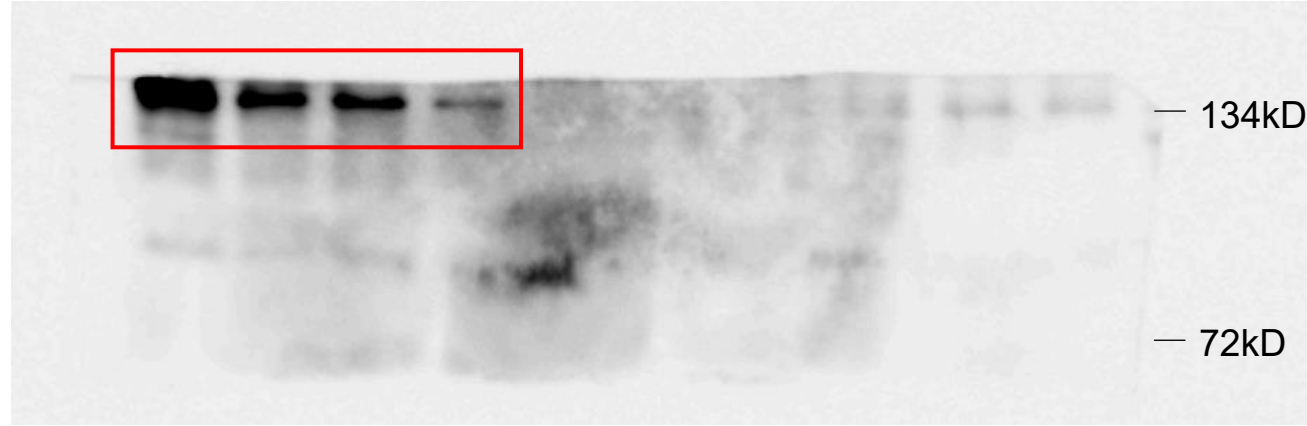

**GAPDH**

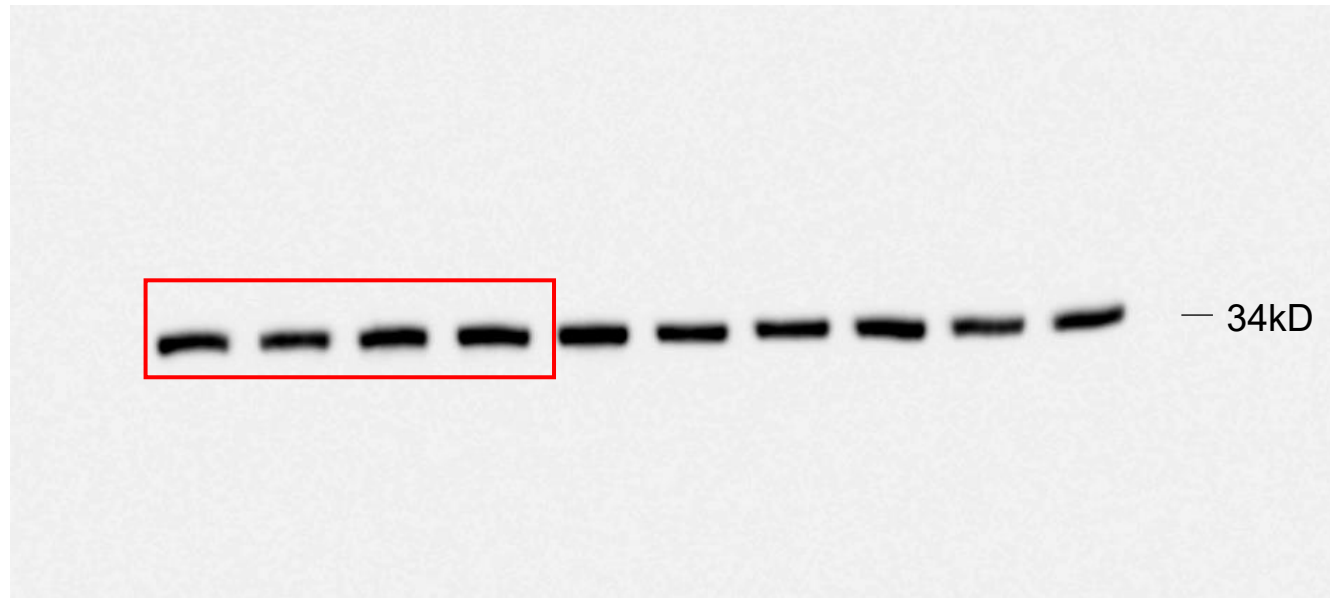

# SFigure 3E

**MMP3**

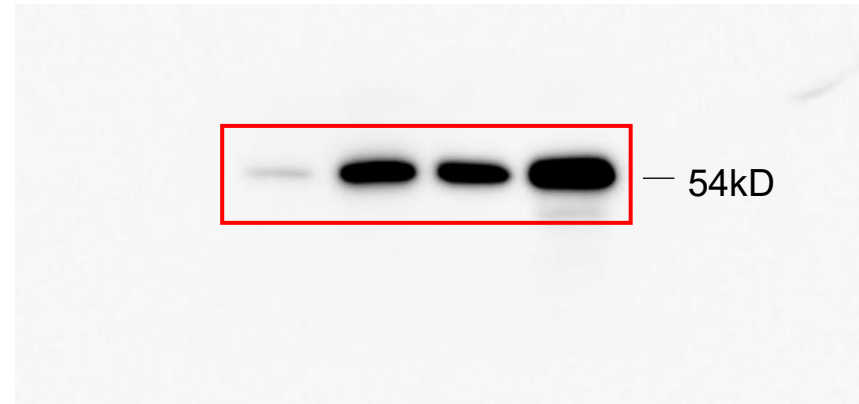

**GAPDH**

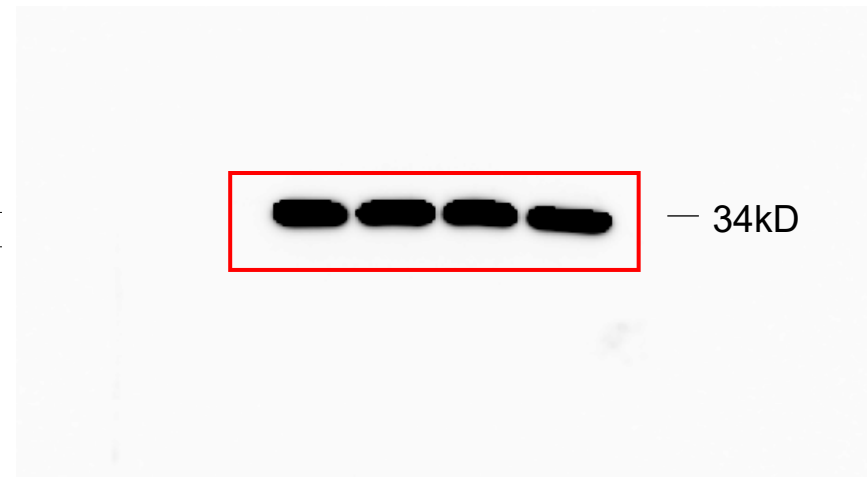

# SFigure 3E

**ADAMTS5**

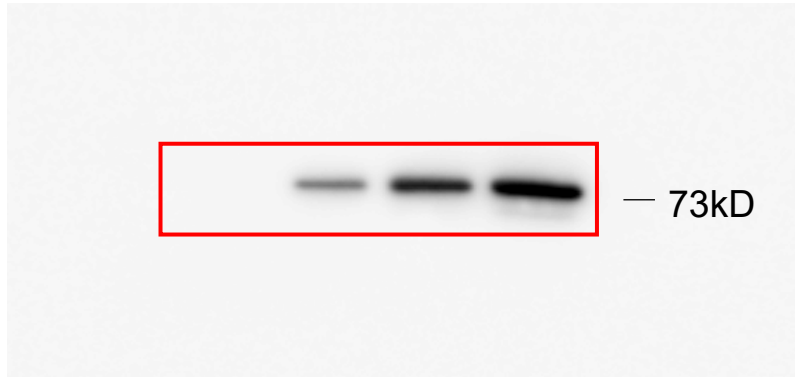

**NOS2**

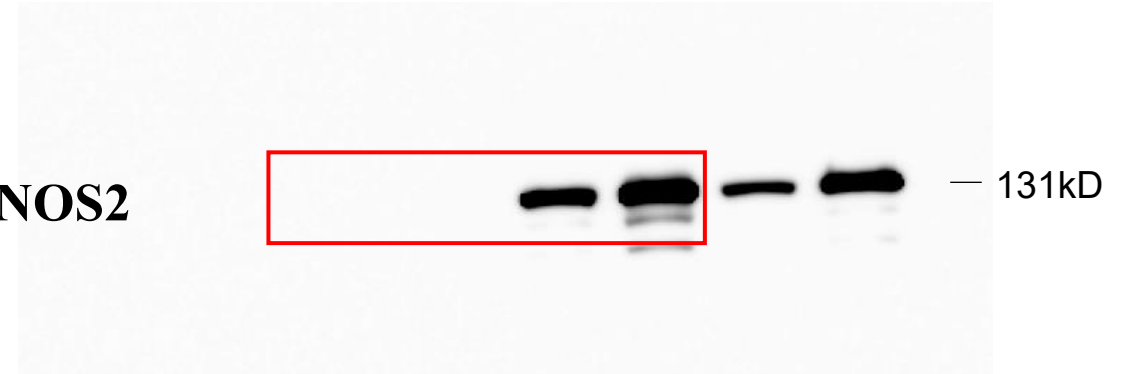

**GAPDH**

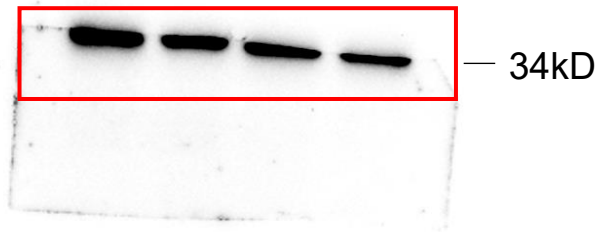

**GAPDH**

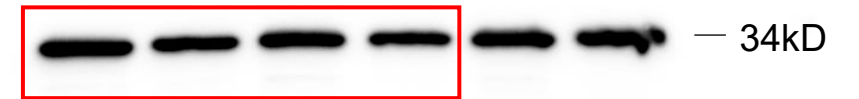

# Figure 3G

SLC1A5

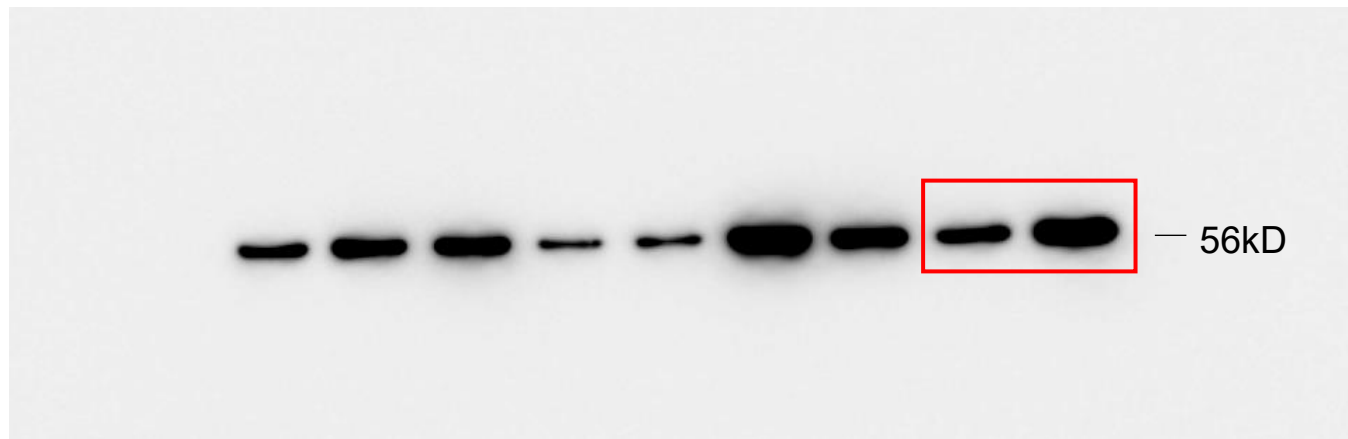

GAPDH

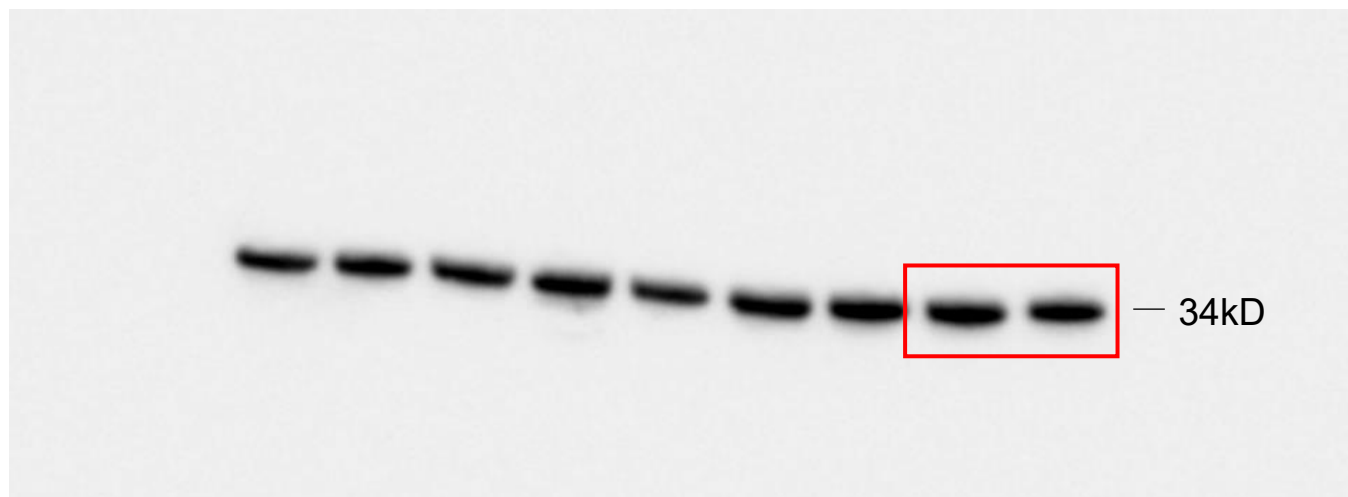

# Figure 3I

**SOX9**

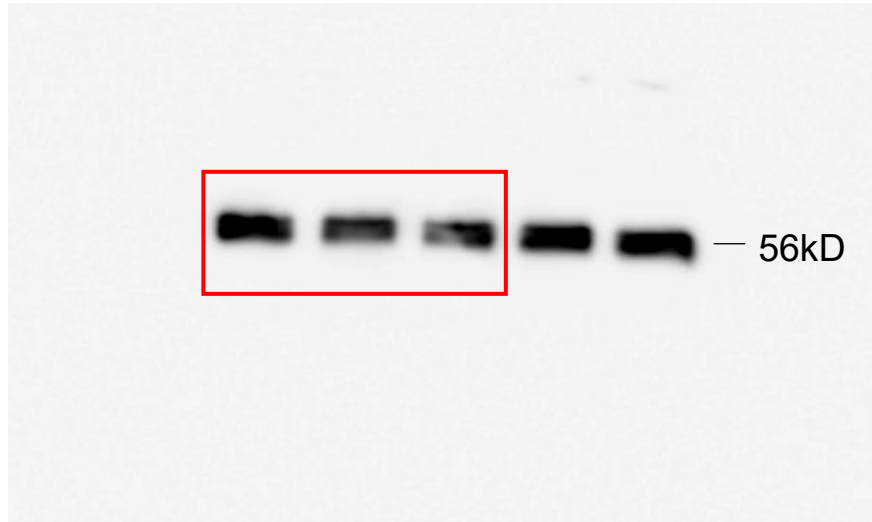

**GAPDH**

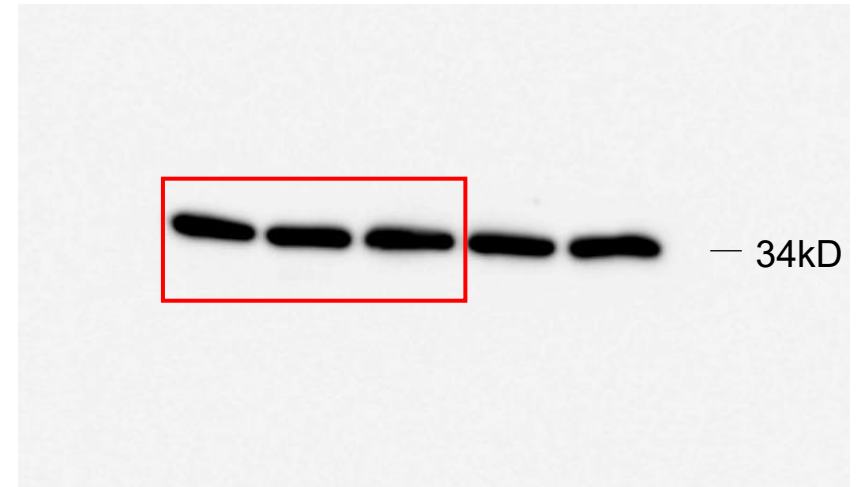

**COL2A1**

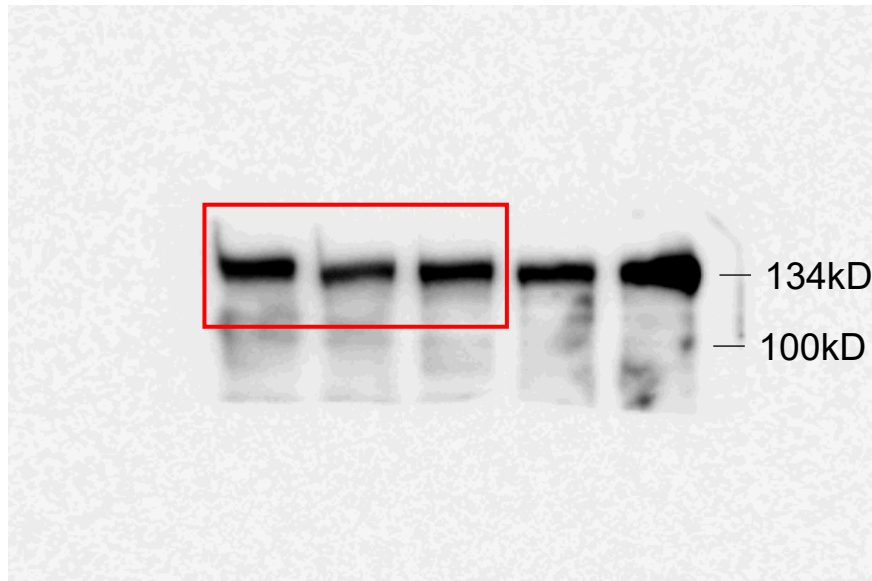

# SFigure 3I

**MMP3**

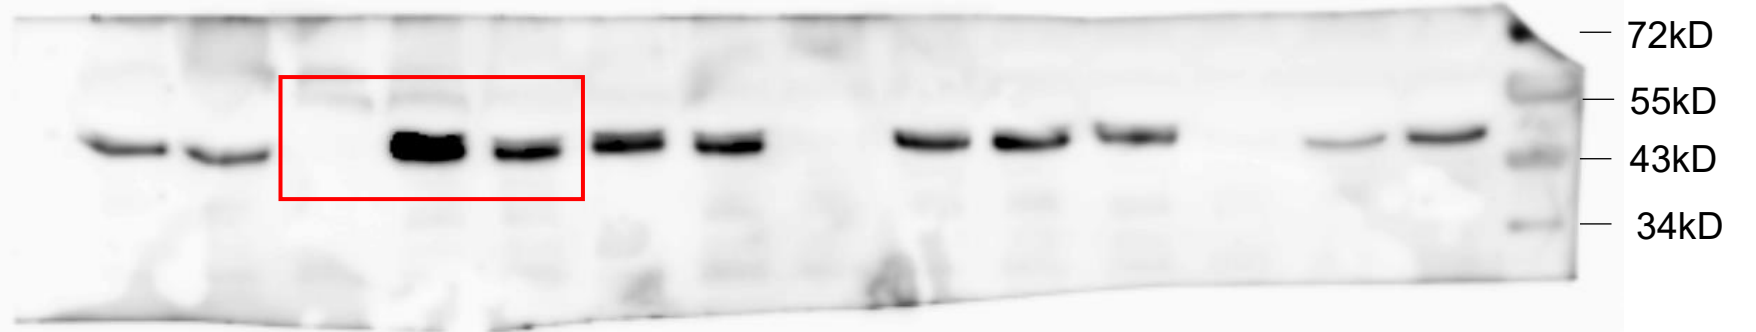

**MMP13**

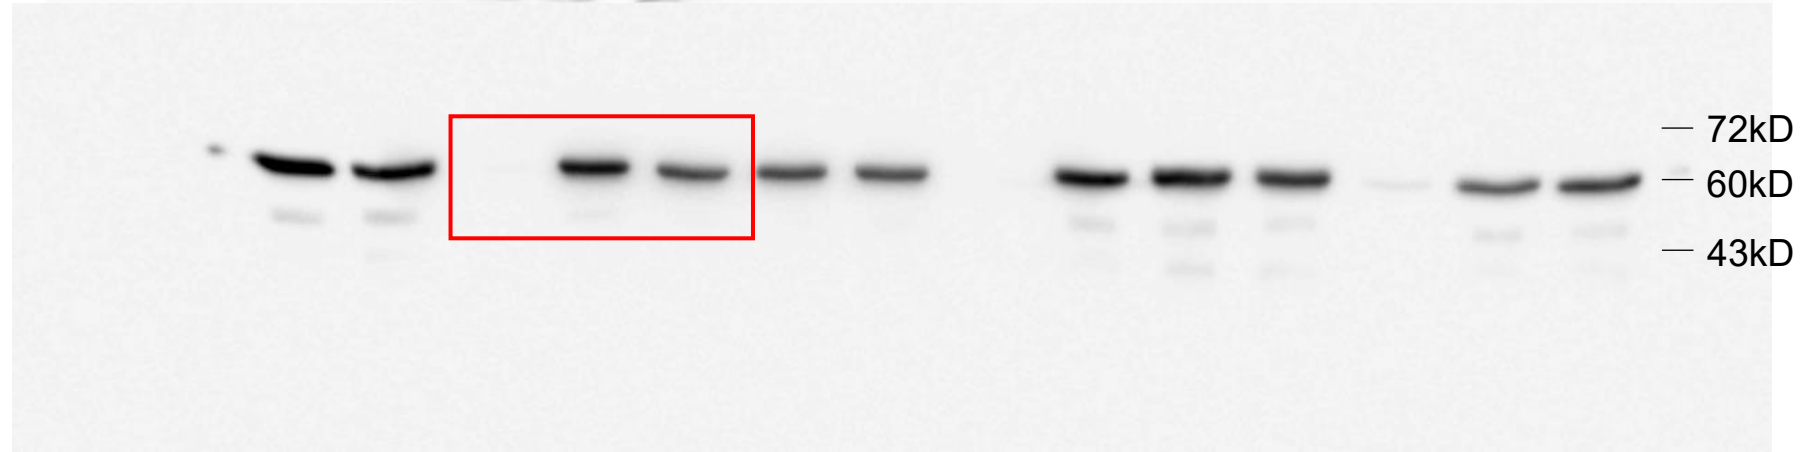

**GAPDH**

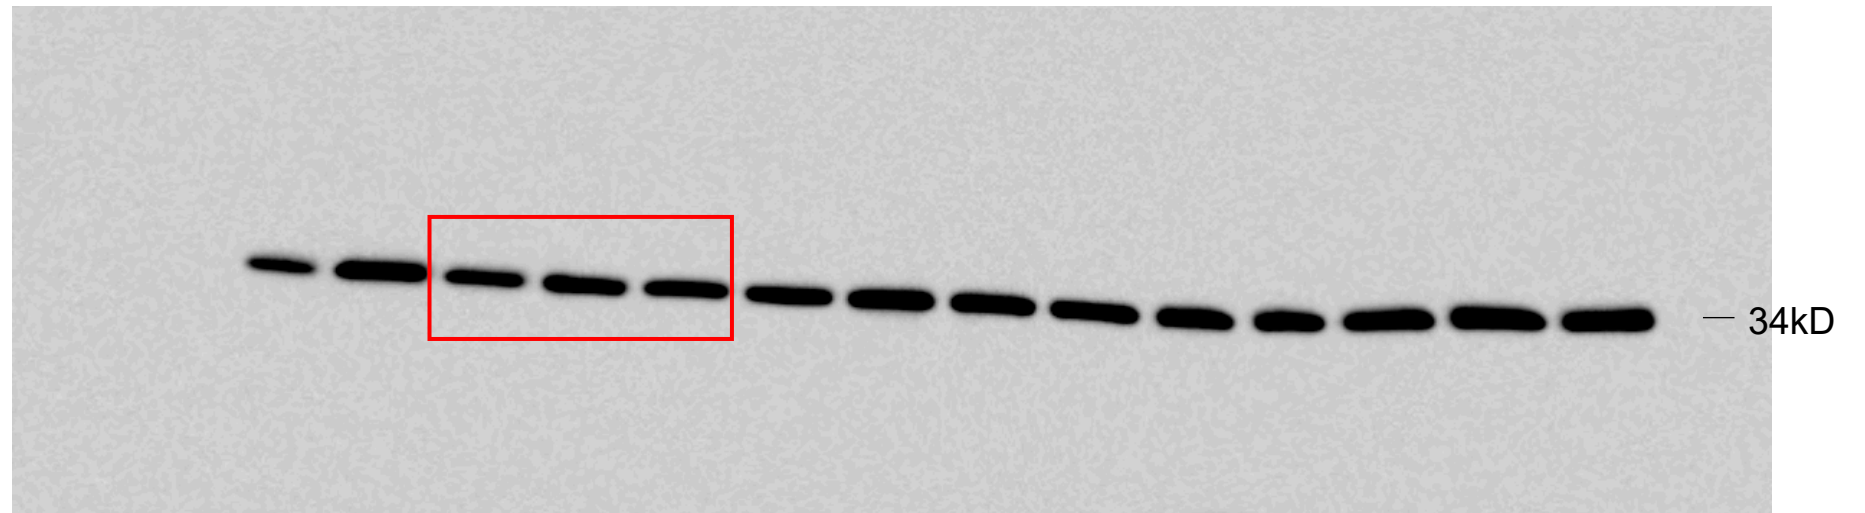

**SFigure 3I**

**ADAMTS5**

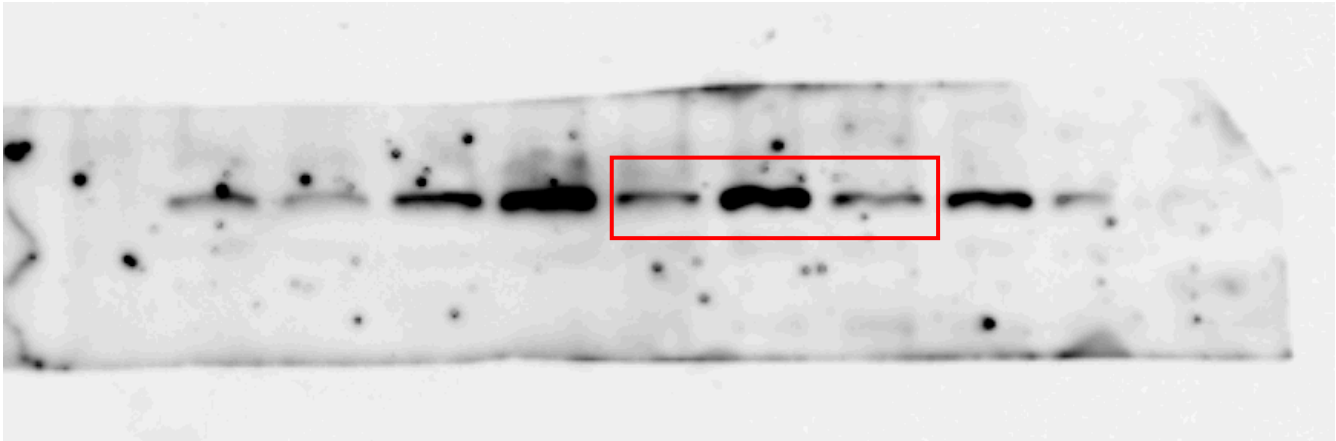

— 100kD  
— 73kD  
— 55kD

**GAPDH**

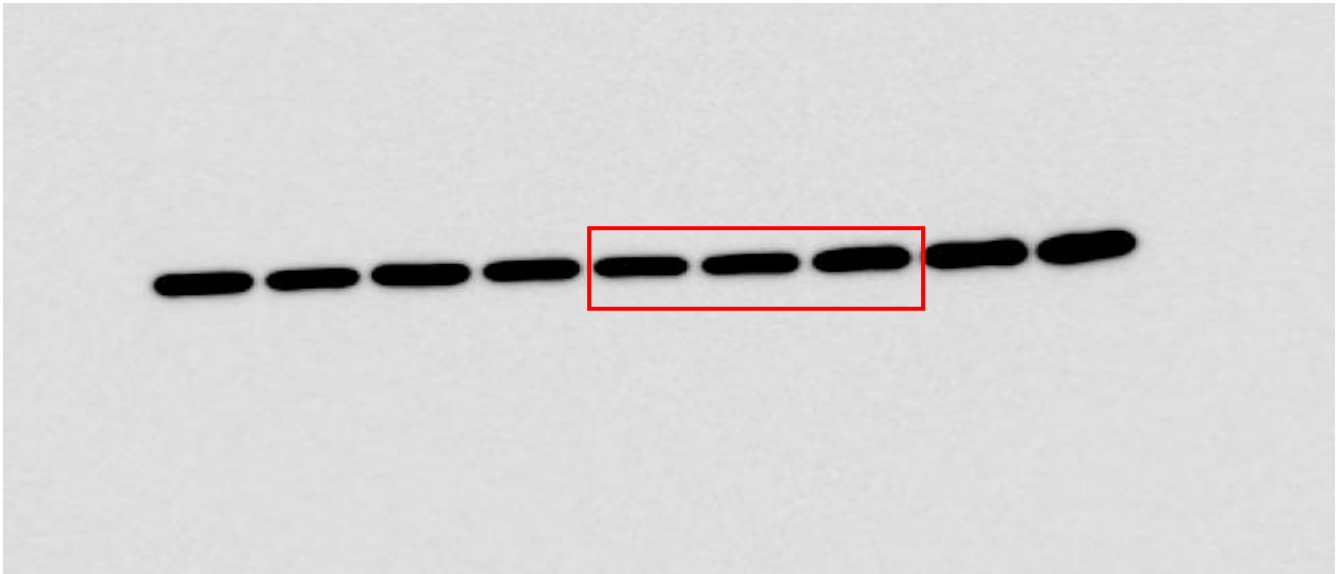

— 34kD

**SFigure 3I**

**NOS2**

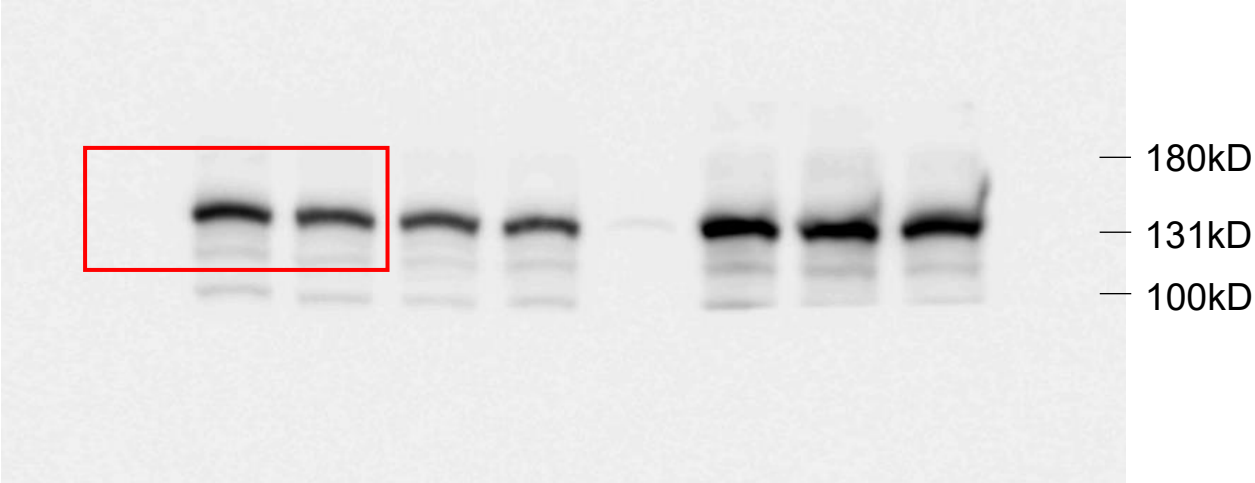

**GAPDH**

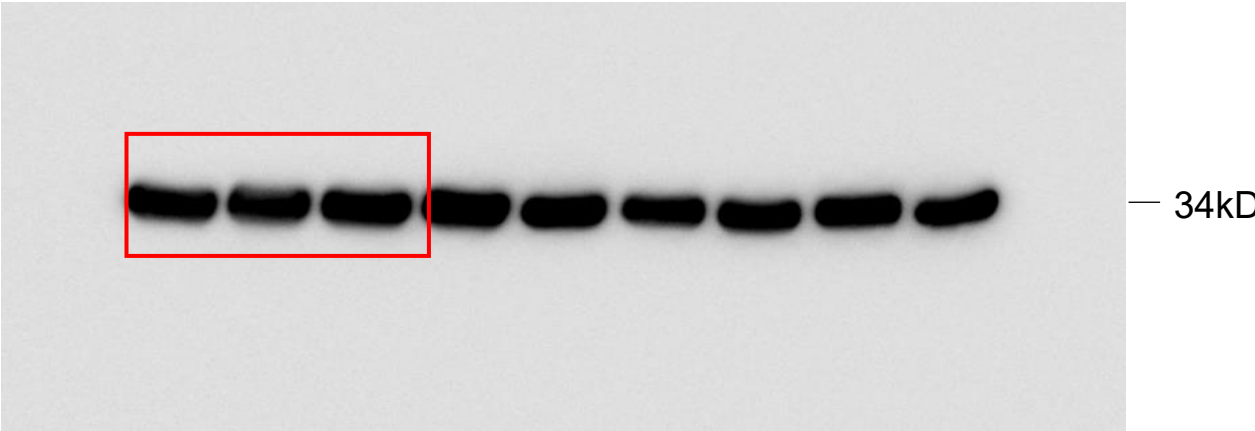

# SFigure 4C

**GLS1**

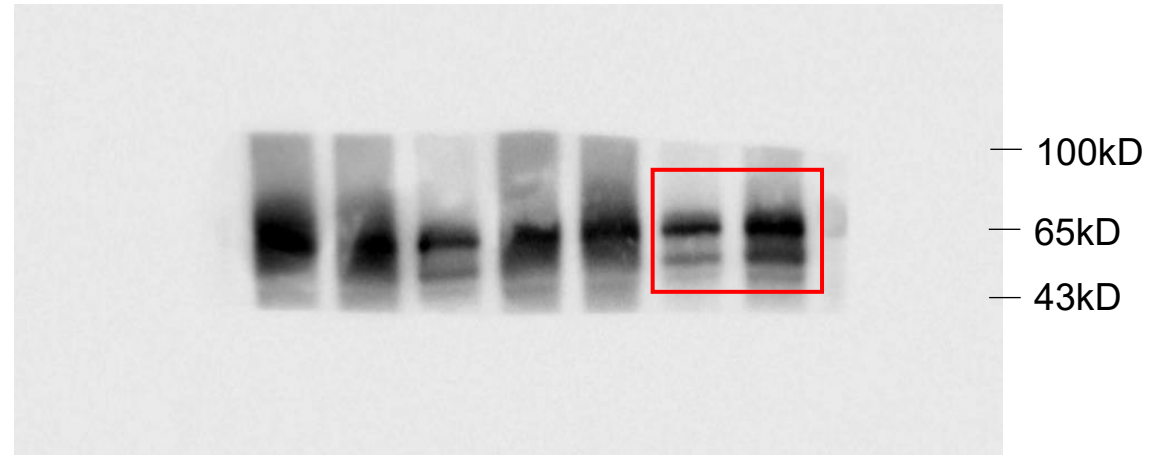

**GAPDH**

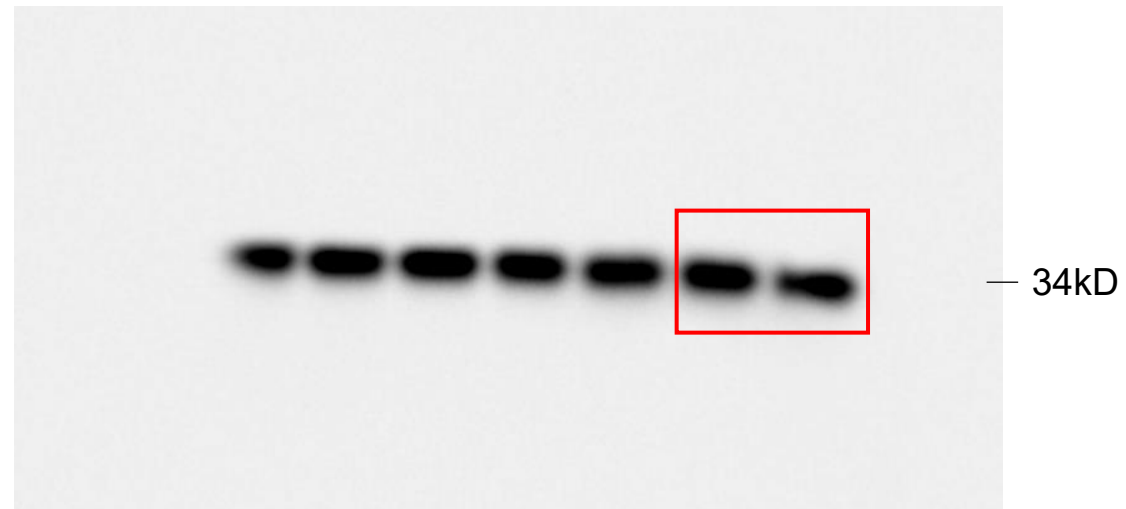

# SFigure 4E

**SOX9**

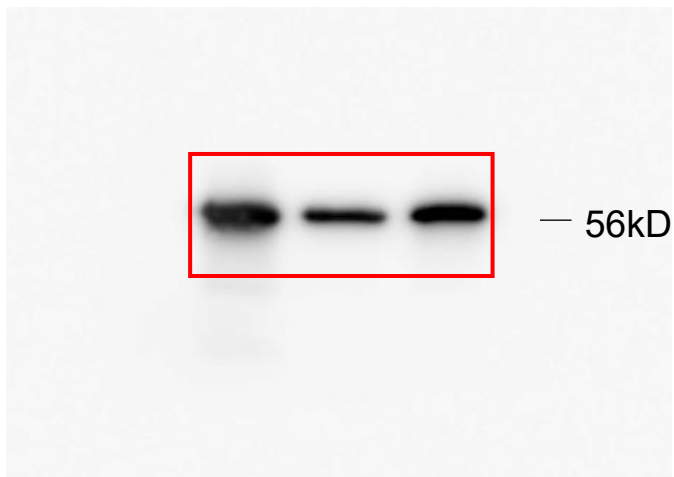

**MMP3**

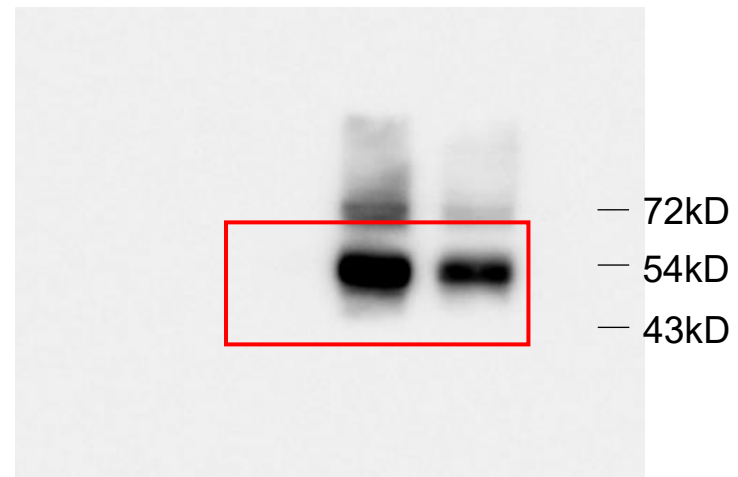

**COL2A1**

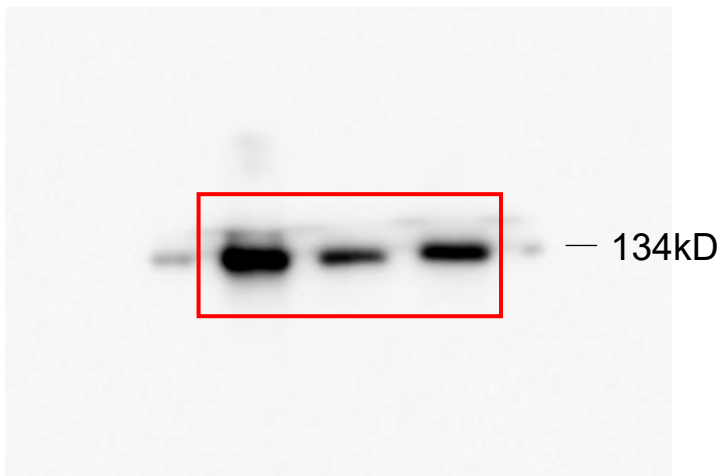

**MMP13**

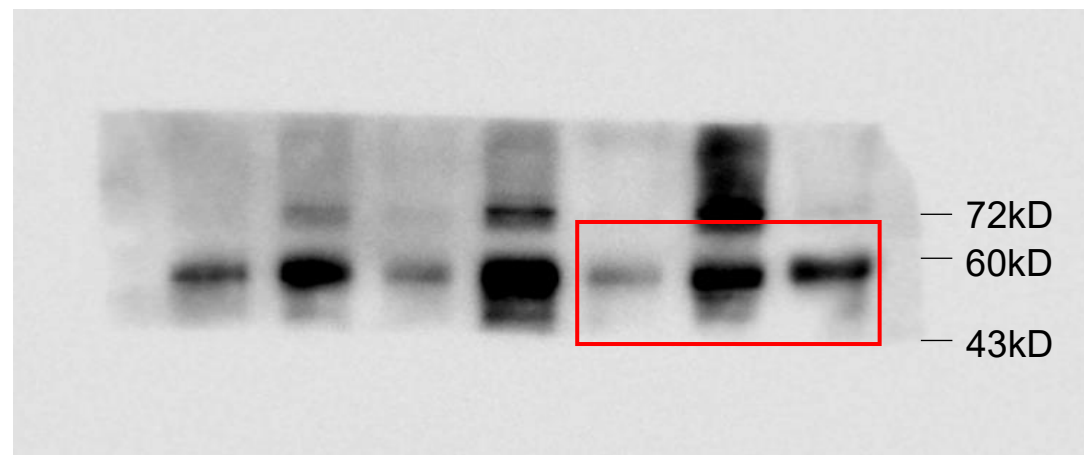

# SFigure 4E

**ADAMTS5**

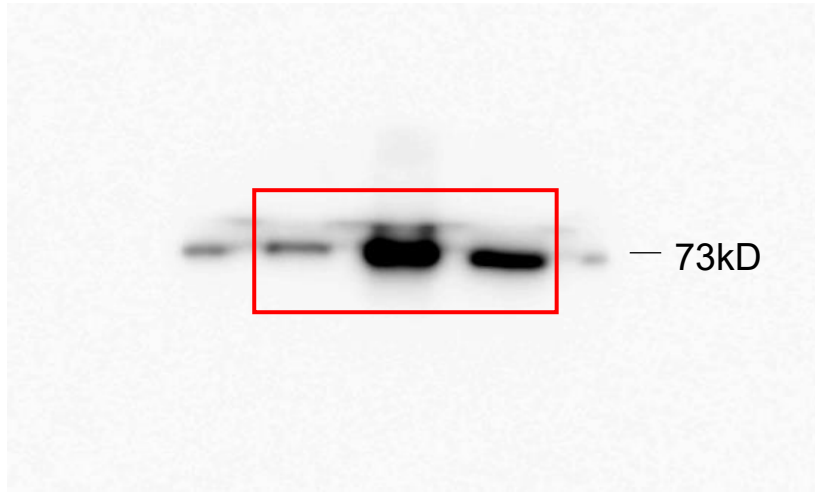

**GAPDH**

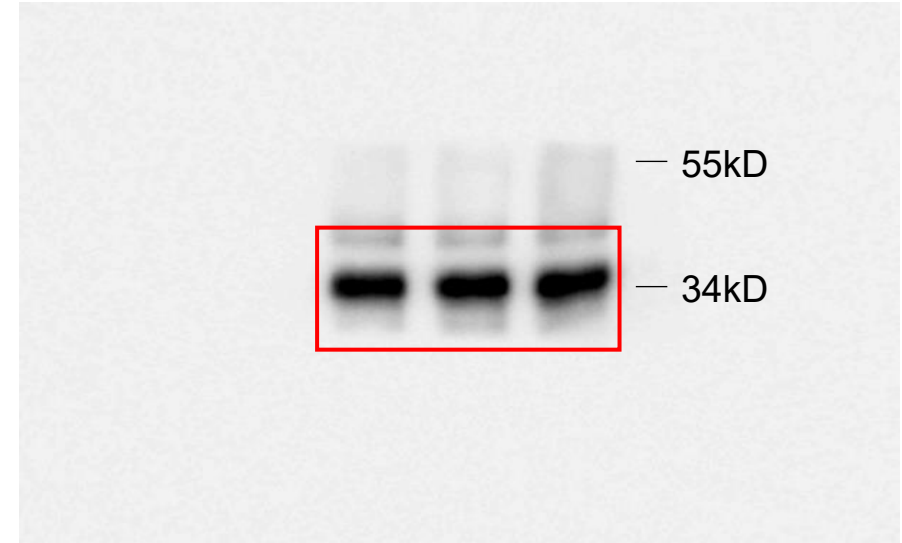

**NOS2**

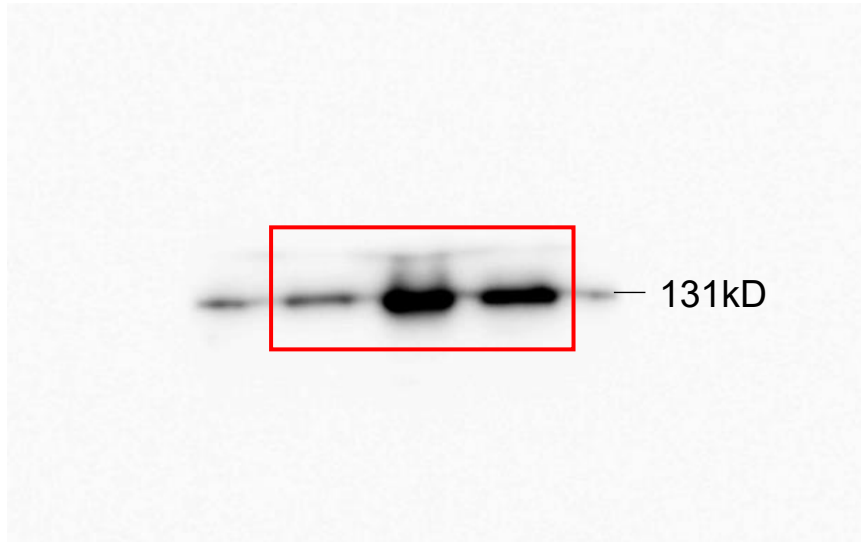

# SFigure 8B

**SOX9**

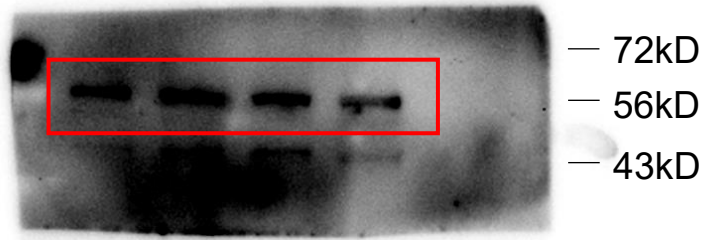

**MMP3**

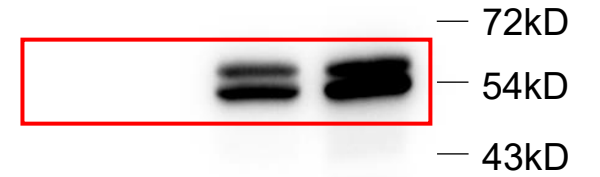

**COL2A1**

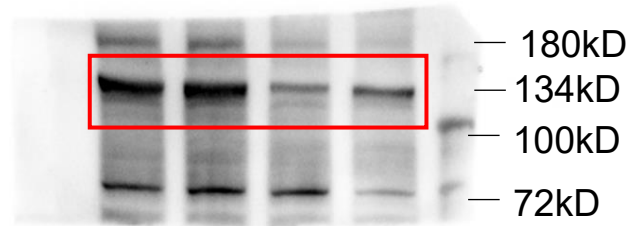

**ADAMTS5**

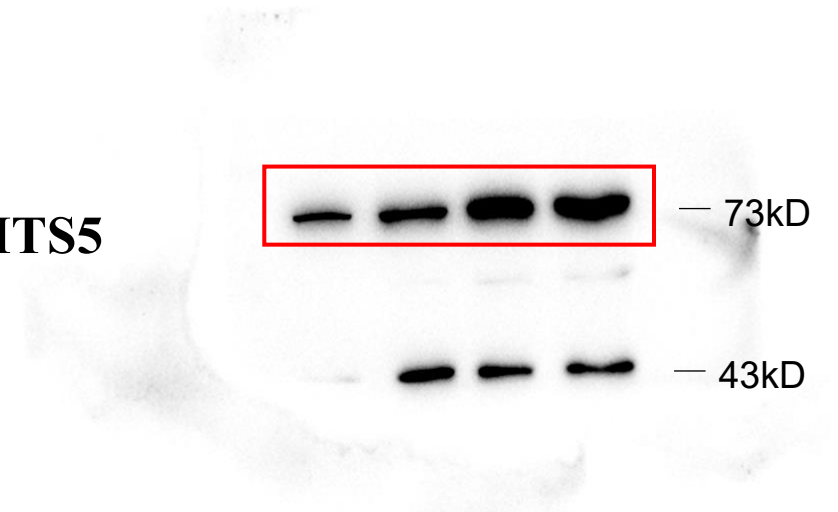

# SFigure 8B

**NOS2**

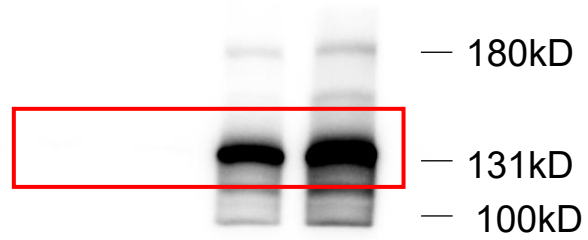

**MMP13**

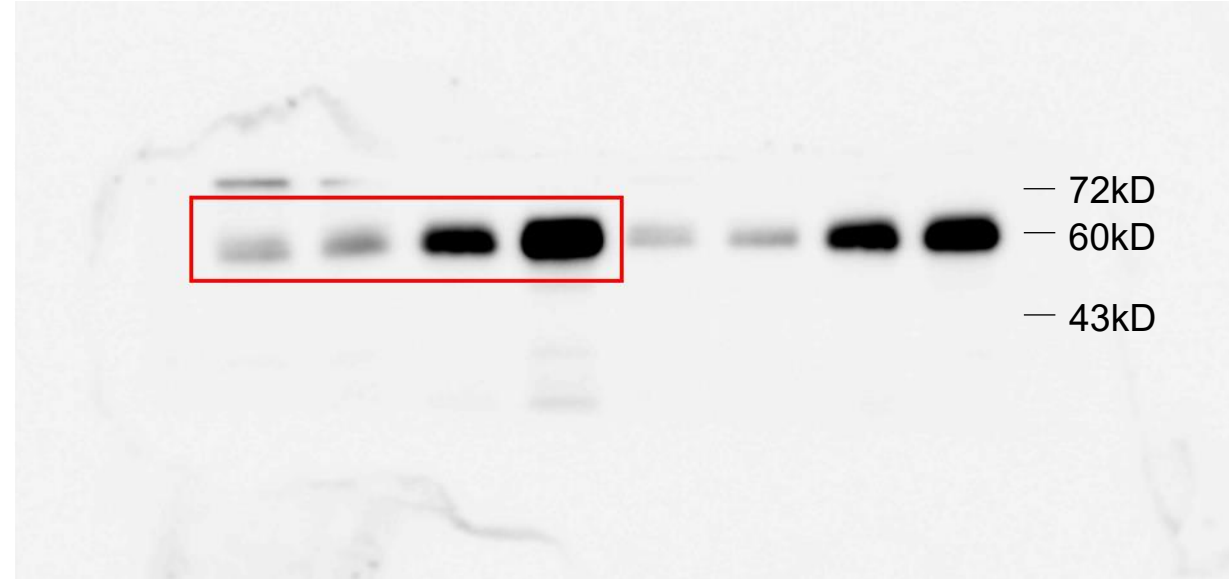

**GAPDH**

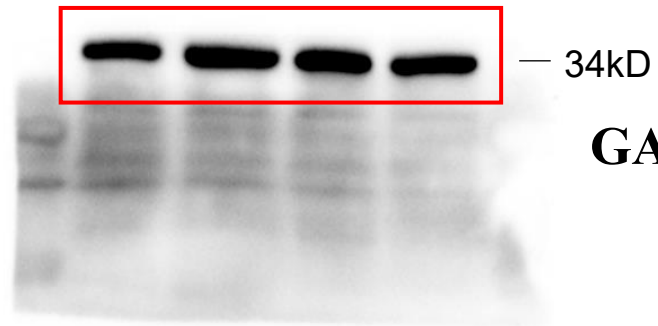

**GAPDH**

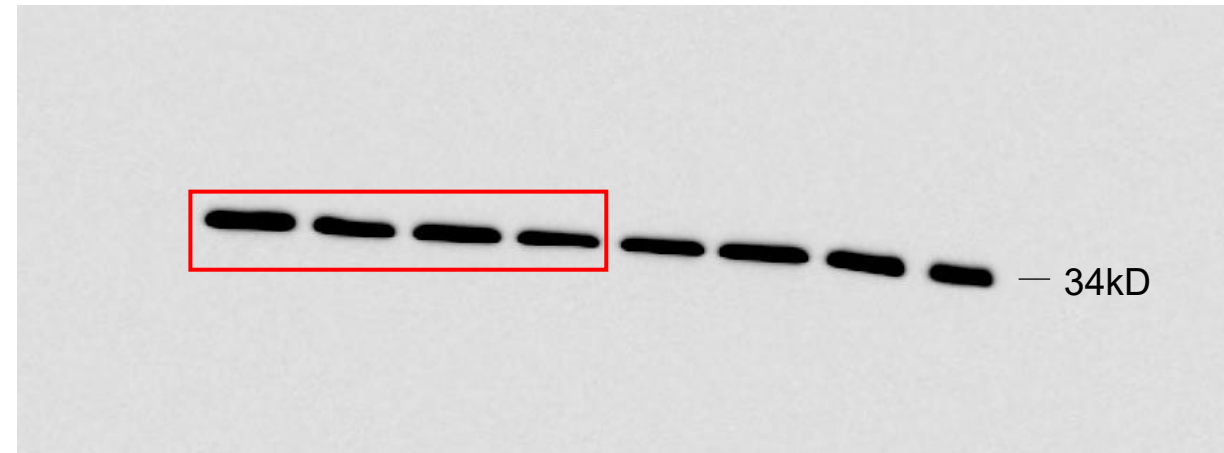

# SFigure 8D

**SOX9**

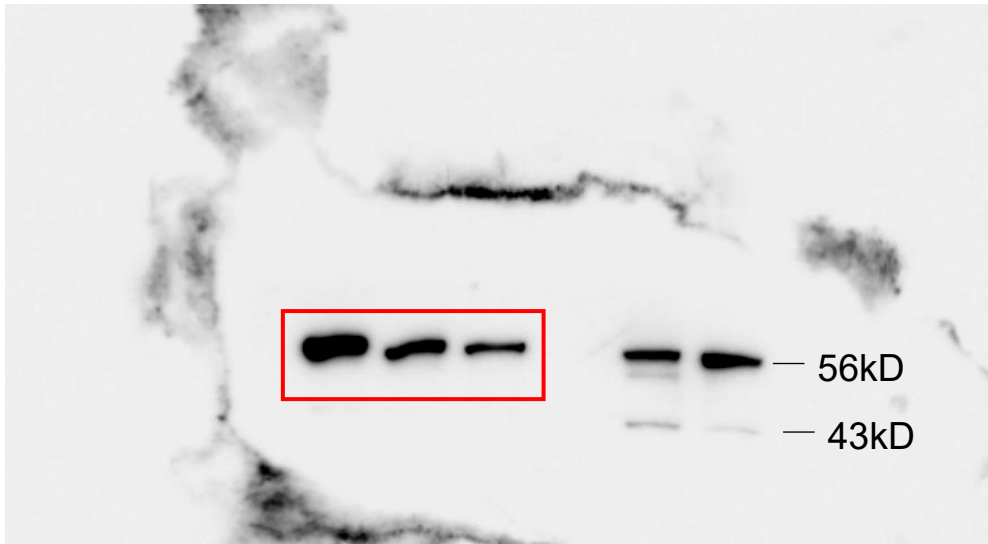

**COL2A1**

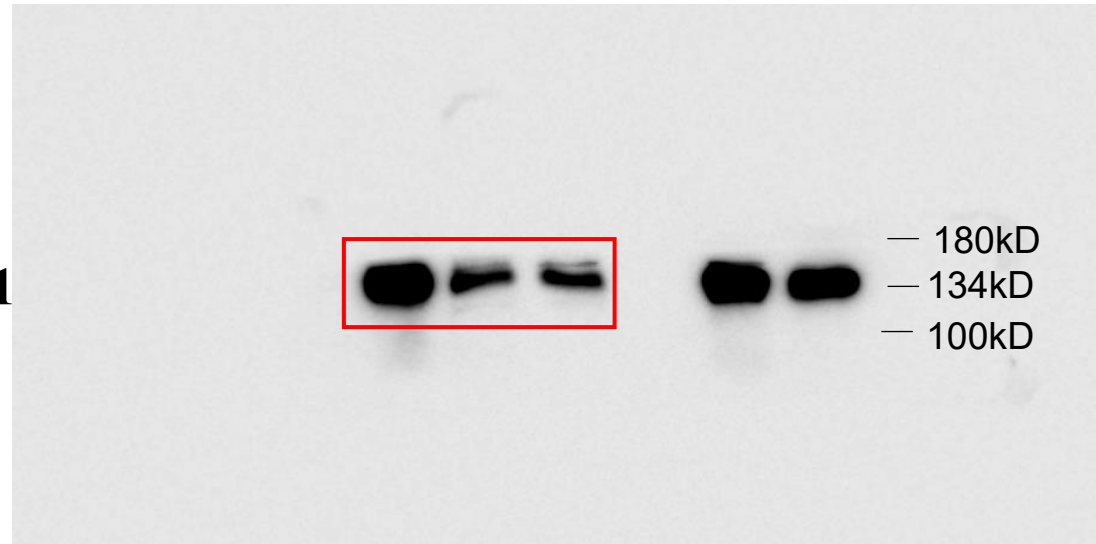

**GAPDH**

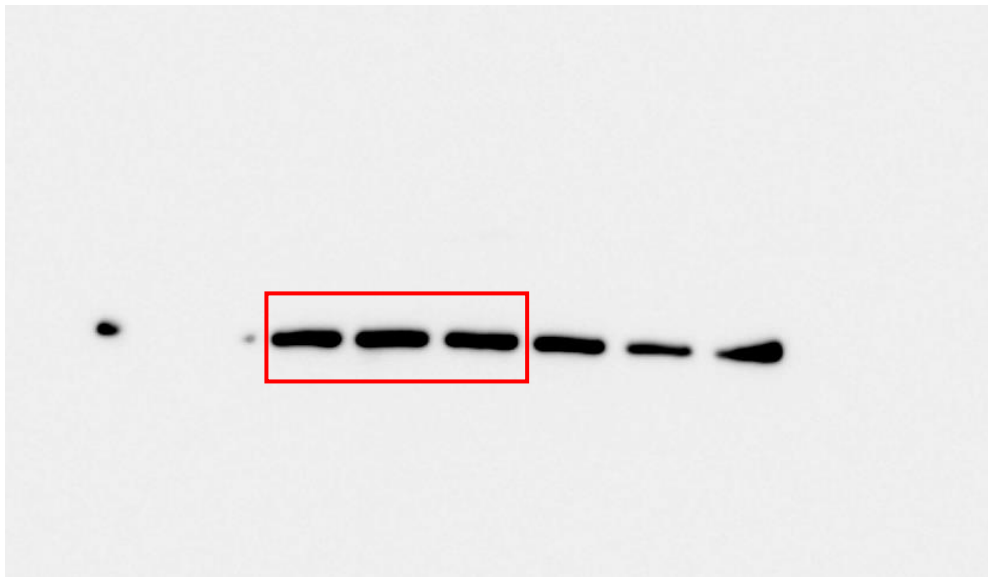

— 34kD

# SFigure 8D

**MMP3**

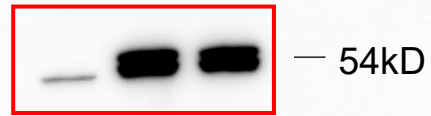

**MMP13**

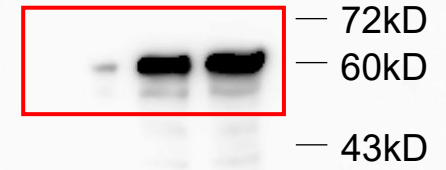

**NOS2**

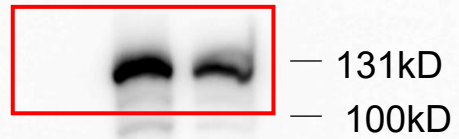

**GAPDH**

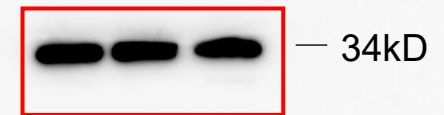

**SFigure 9A**

**HIF-1 $\alpha$**

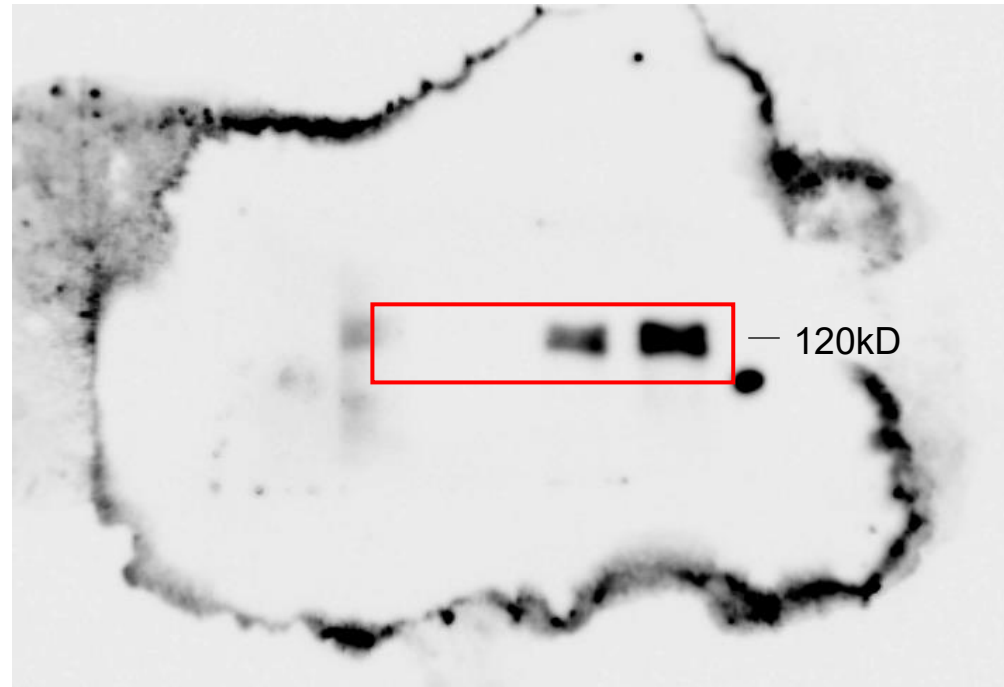

**GAPDH**

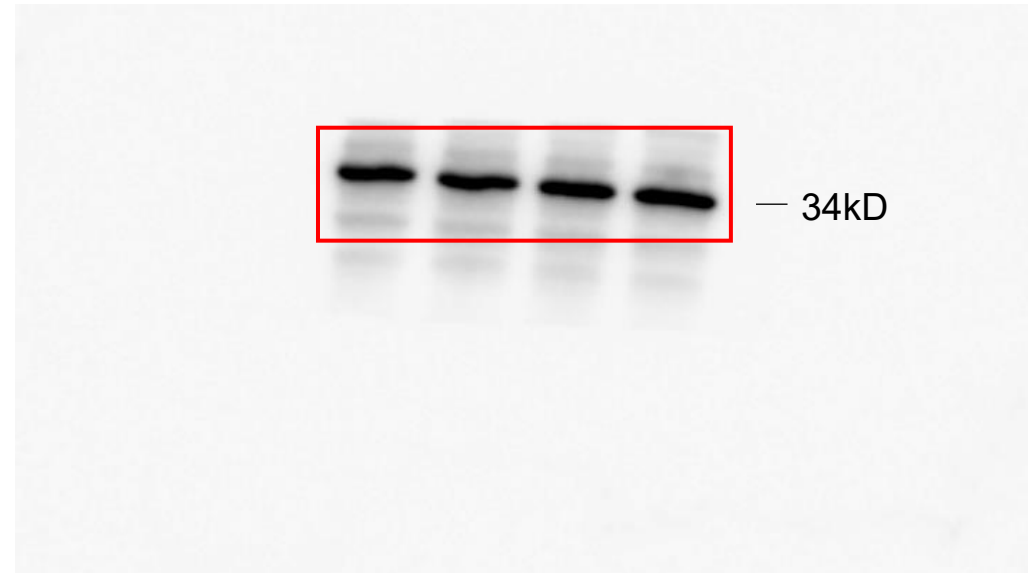

# SFigure 9B

**HIF-1 $\alpha$**

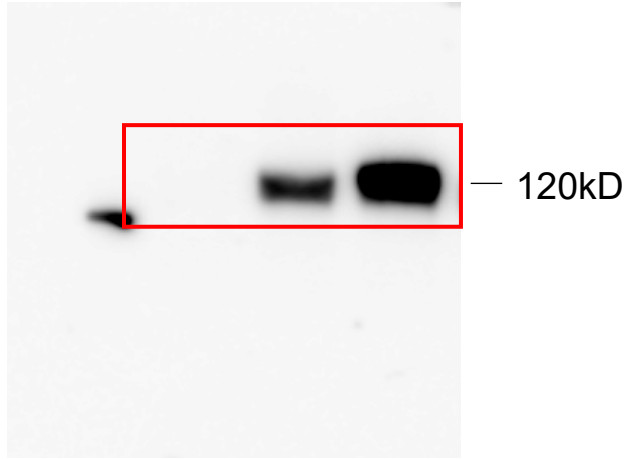

**HIF-1 $\alpha$**

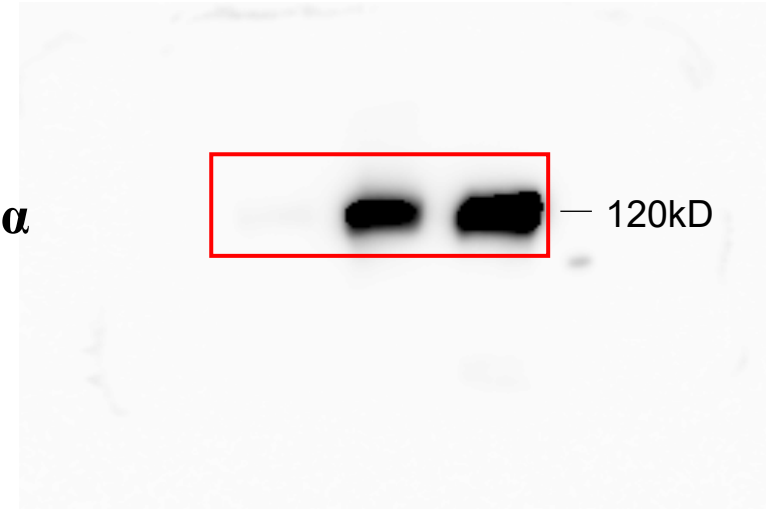

**GAPDH**

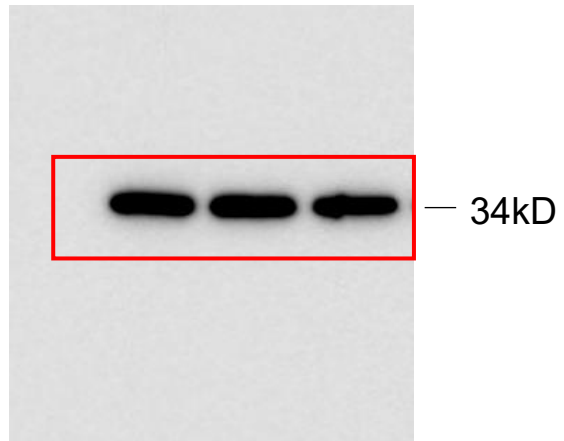

**LaminA/C**

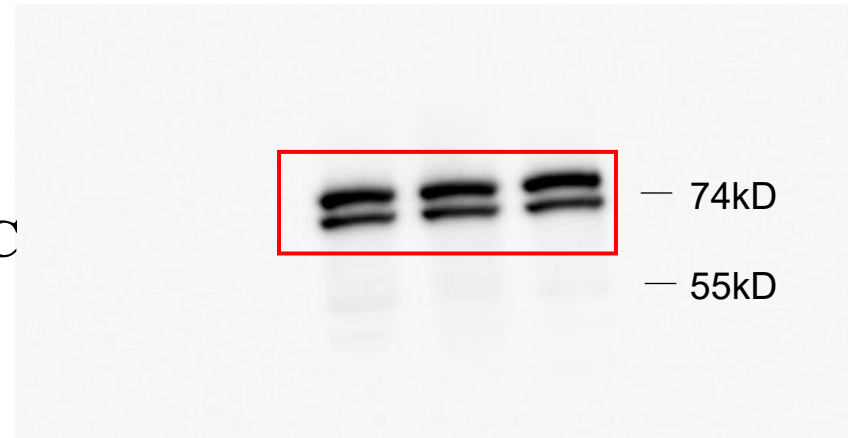

# SFigure 9D

**SOX9**

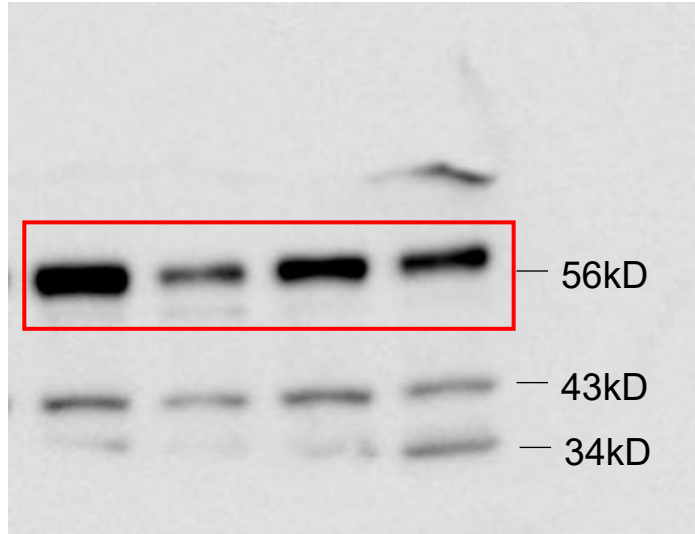

**COL2A1**

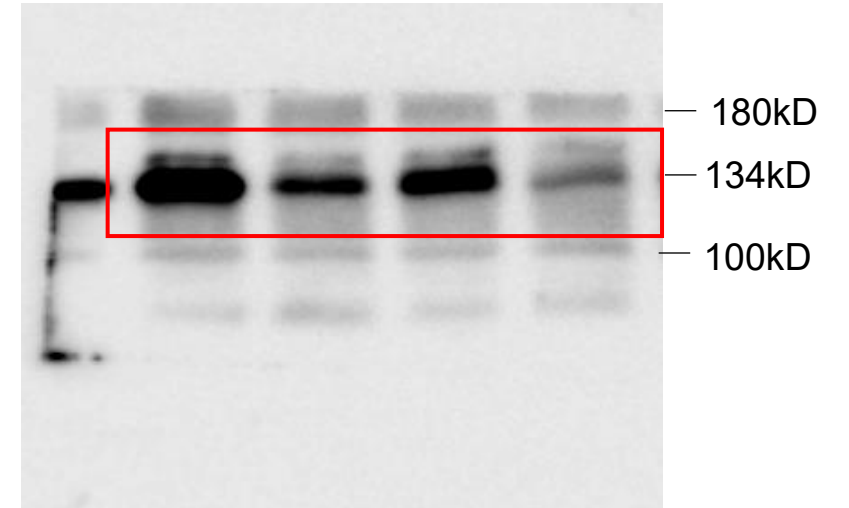

**MMP3**

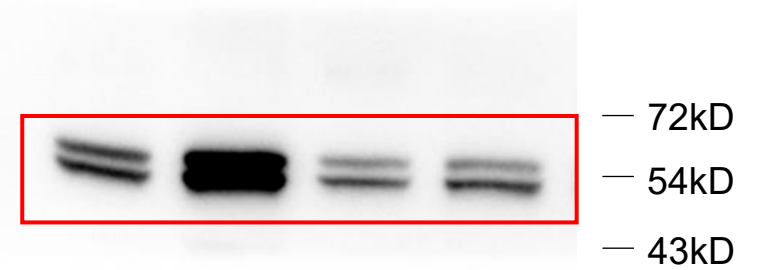

# SFigure 9D

**MMP3**

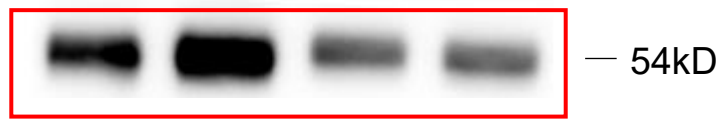

**NOS2**

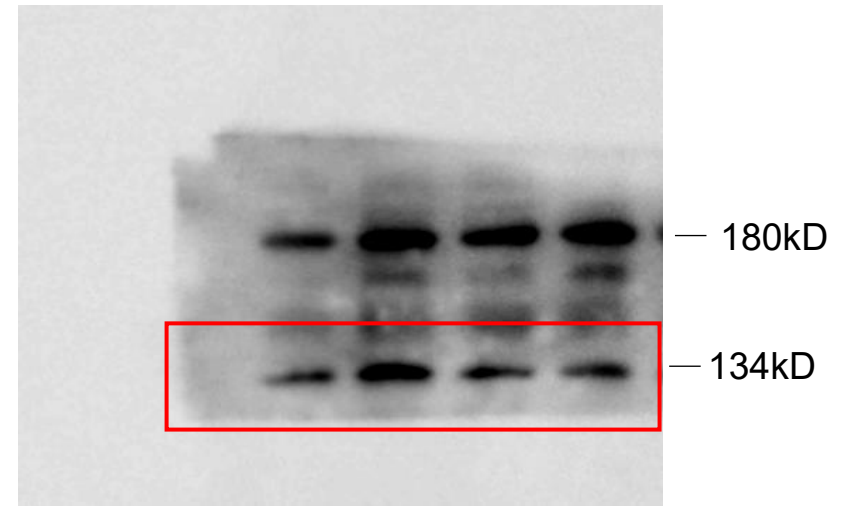

**ADAMTS5**

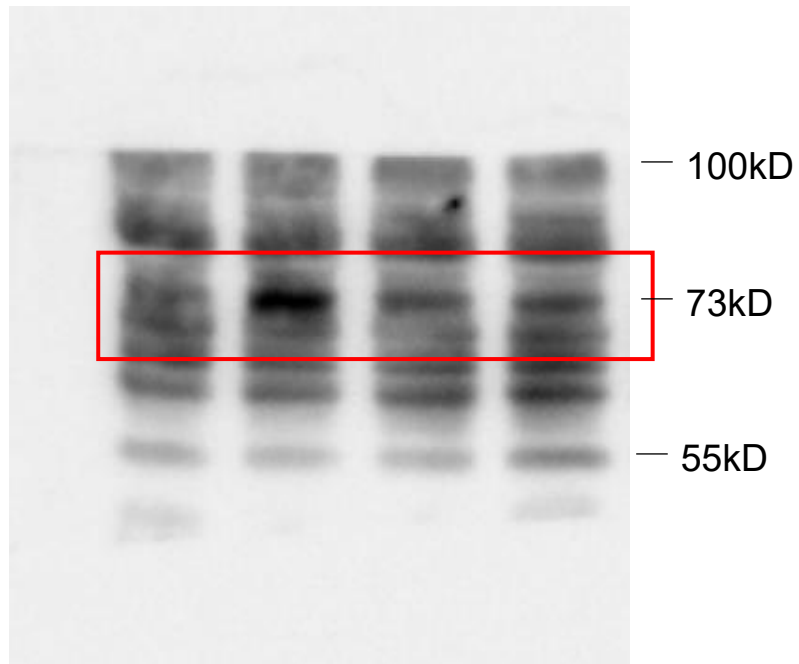

**GAPDH**

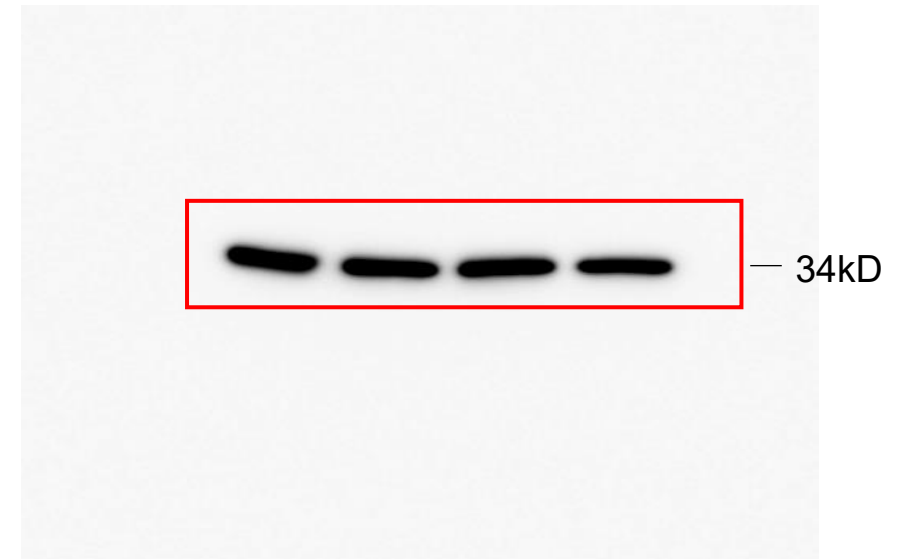

**SFigure 12B**

**SLC1A5**

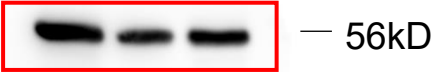

**GLS1**

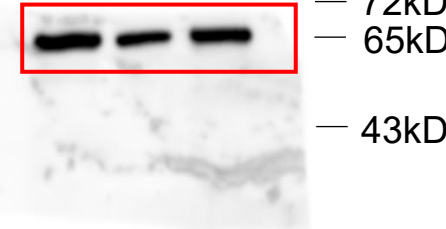

**GAPDH**

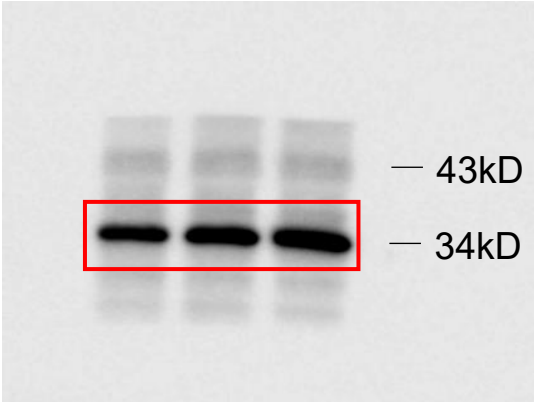

# SFigure 12G

H3K27me3

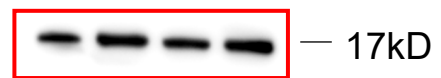

H3

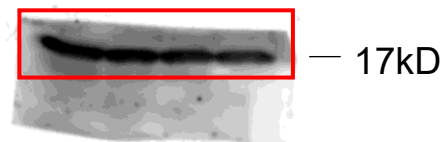

# SFigure 12G

**SLC1A5**

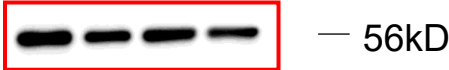

**GLS1**

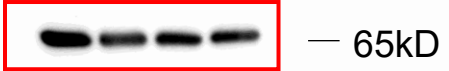

**GAPDH**

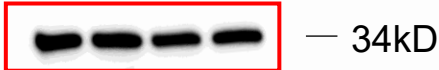

**SFigure 13B**

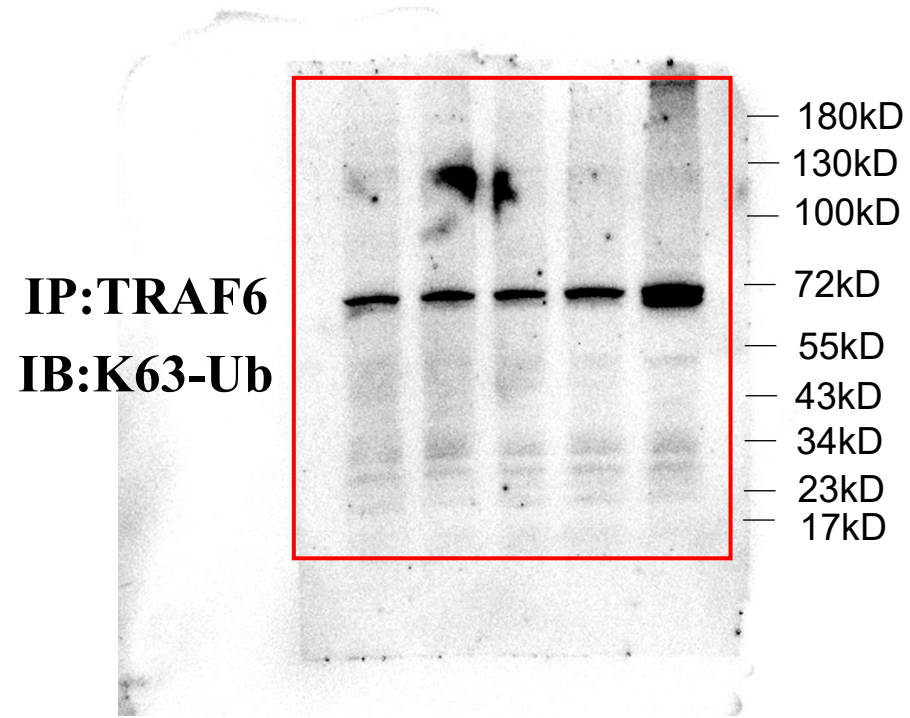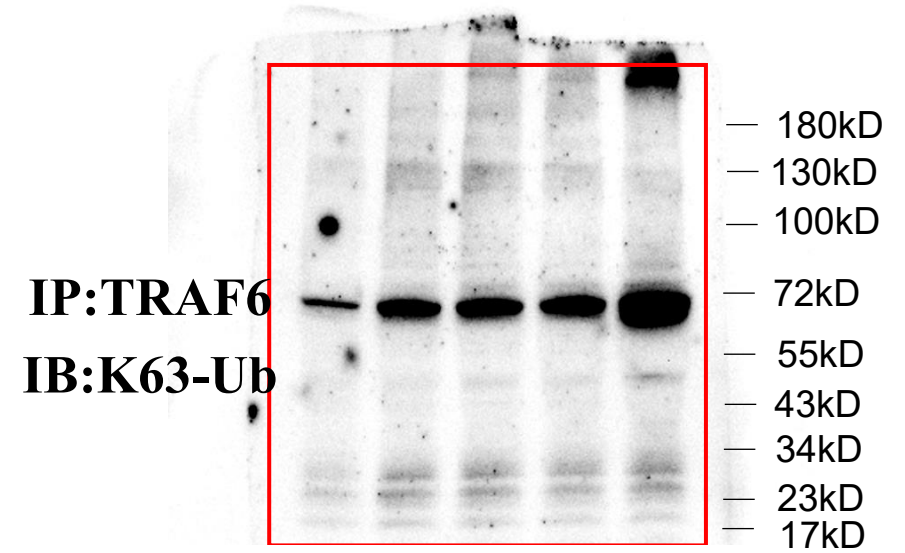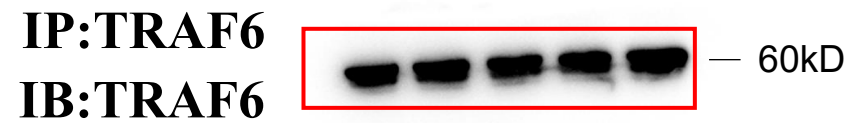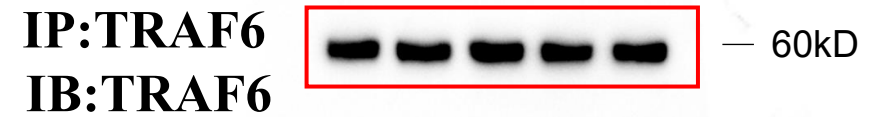

# SFigure 13C

**IP:HA**  
**IB:Flag**

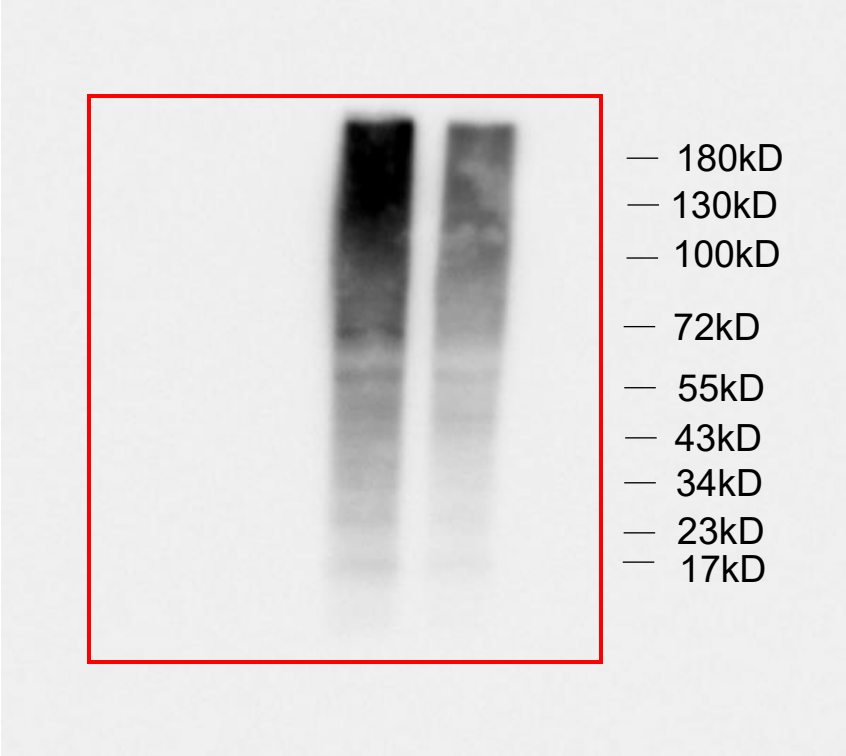

**IP:HA**  
**IB:HA**

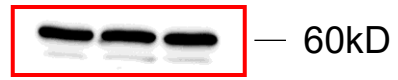

# SFigure 13D

**Nuclear p65**

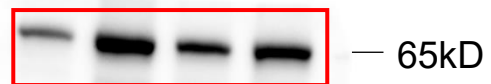

**Lamin A/C**

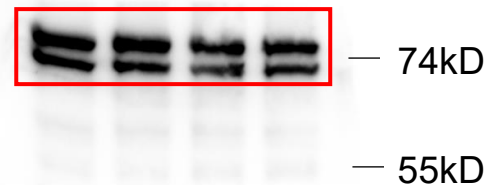

**WCL  
p65**

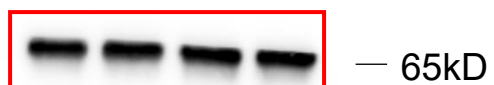

**GAPDH**

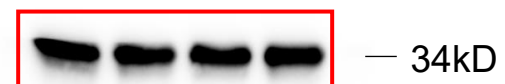

# SFigure 13D

**pIKK $\alpha/\beta$**

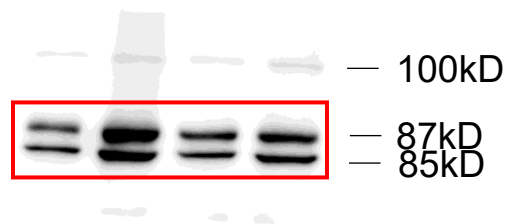

**pI $\kappa$ B $\alpha$**

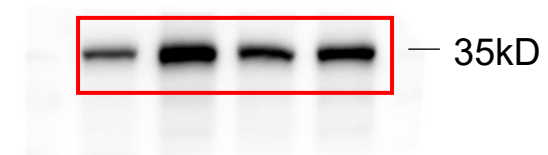

**IKK $\alpha/\beta$**

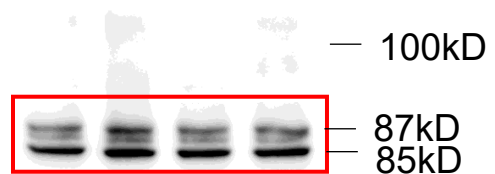

**I $\kappa$ B $\alpha$**

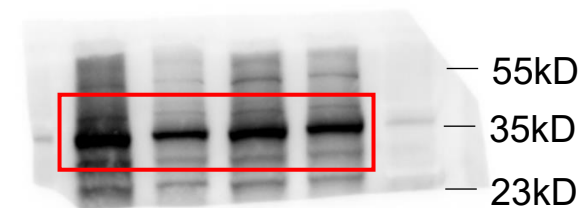

**GAPDH**

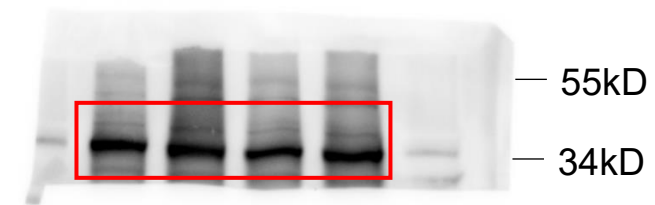

# SFigure 13E

**Nuclear p65**

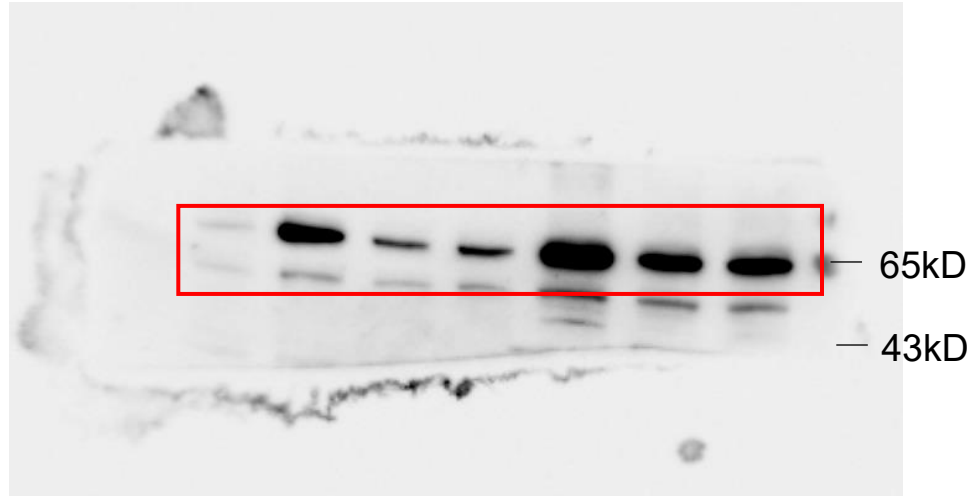

**WCL  
p65**

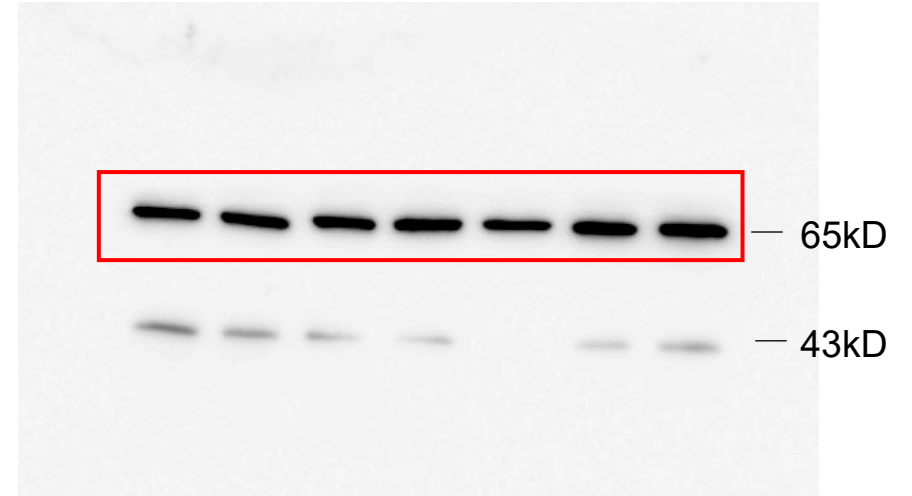

**Lamin A/C**

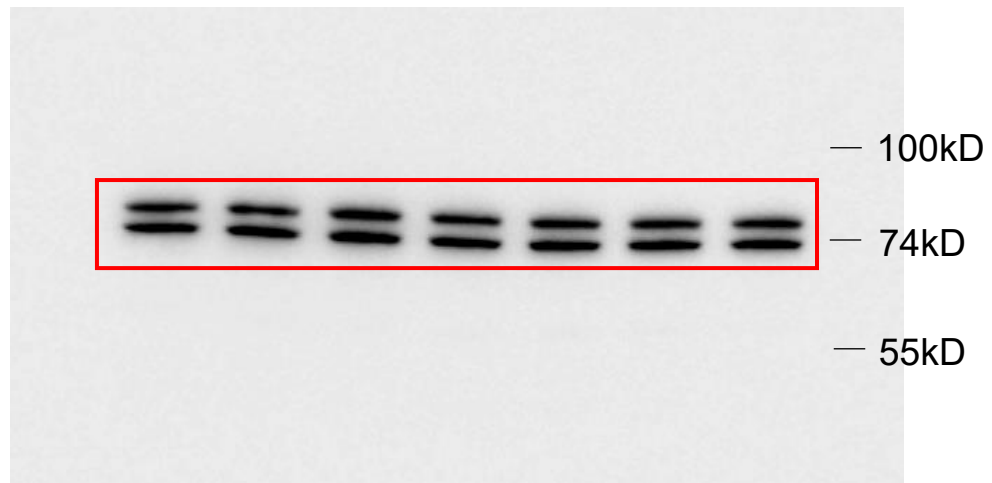

**GAPDH**

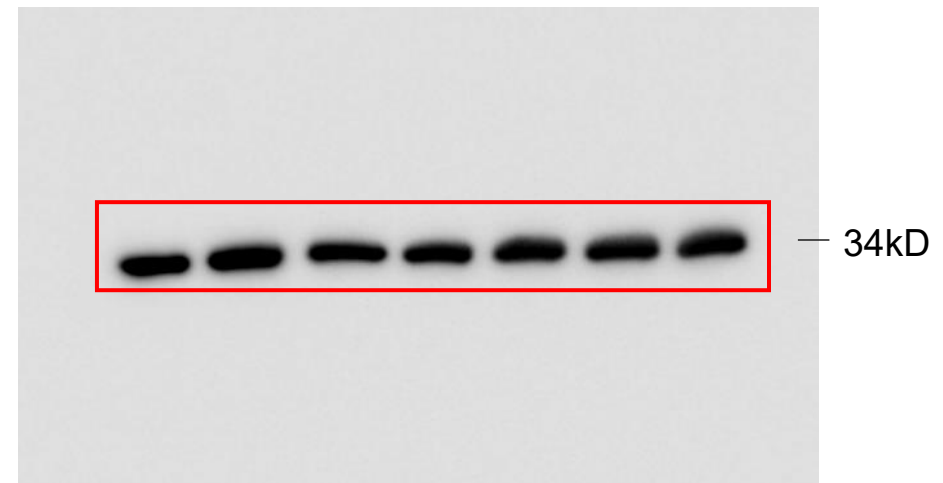

# SFigure 13E

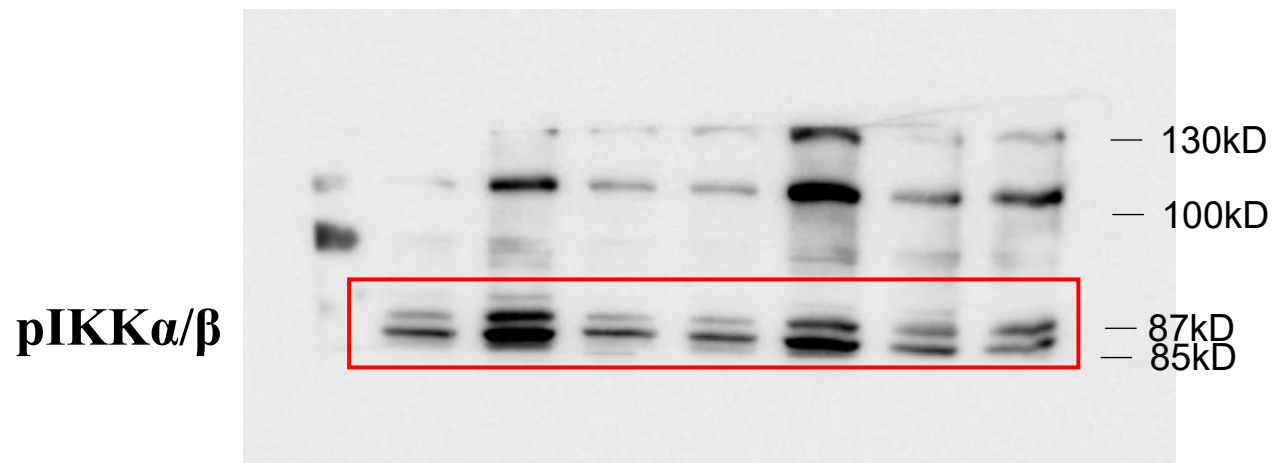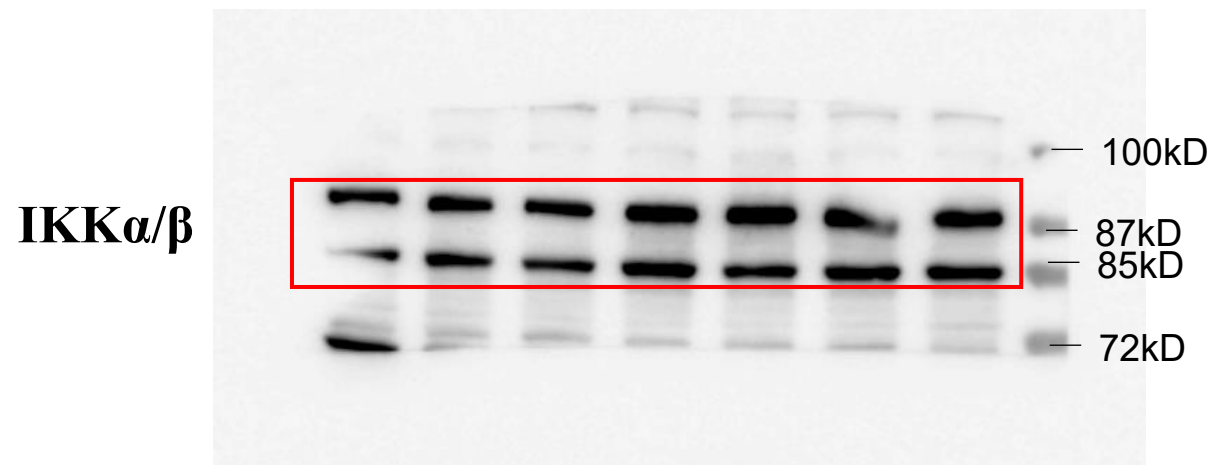

**pI $\kappa$ B $\alpha$**

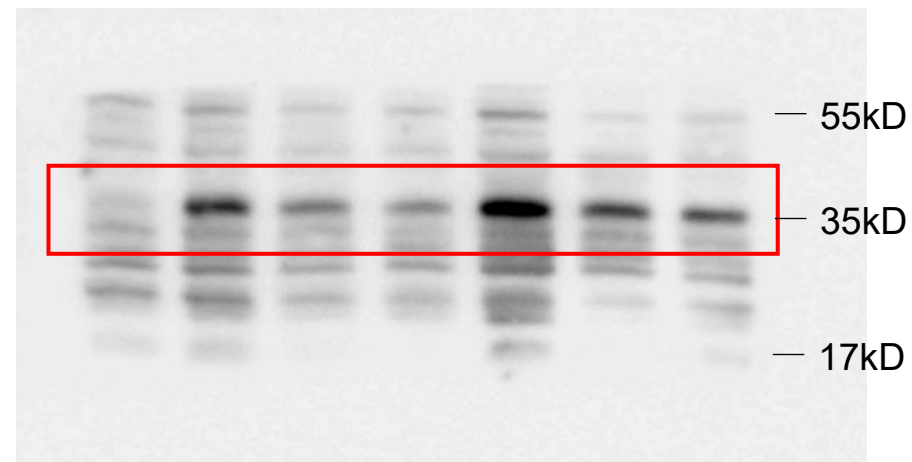

**I $\kappa$ B $\alpha$**

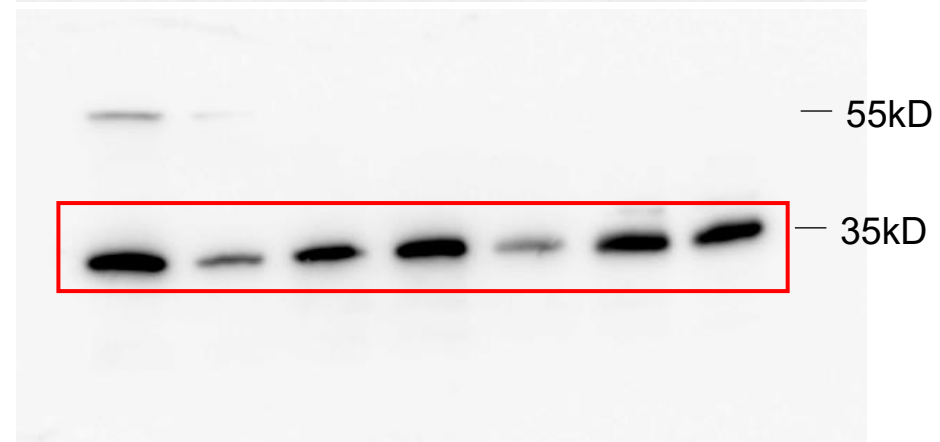

**GAPDH**

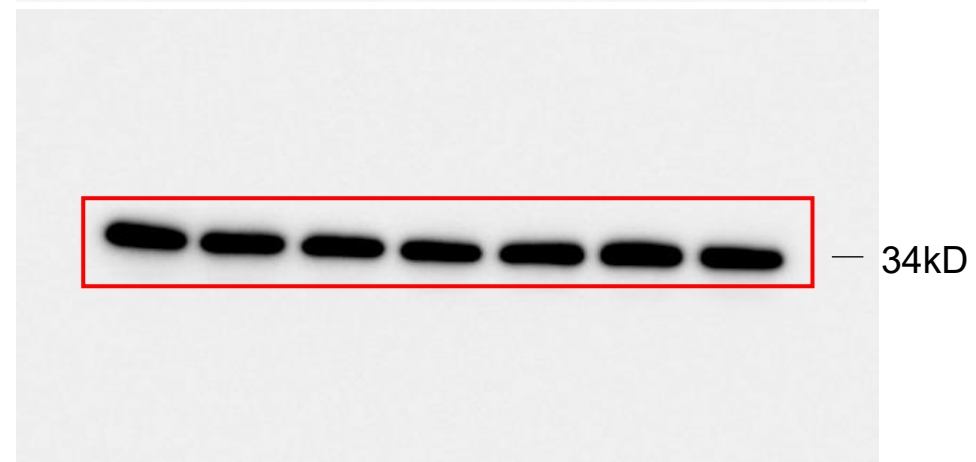

# SFigure 13G

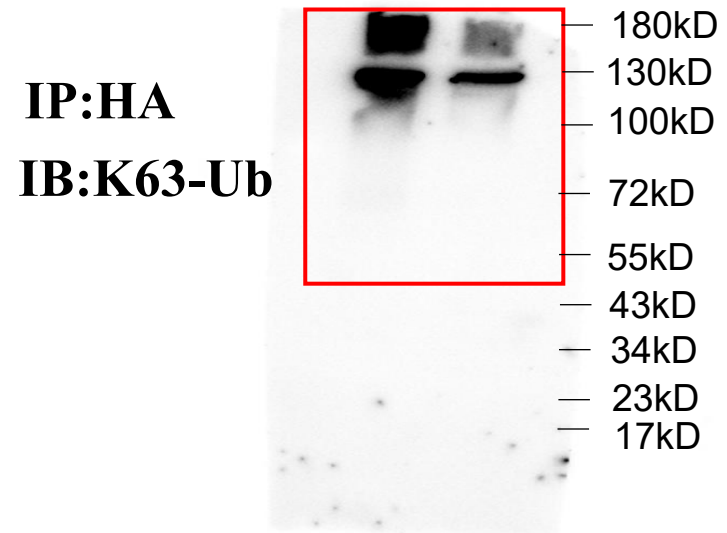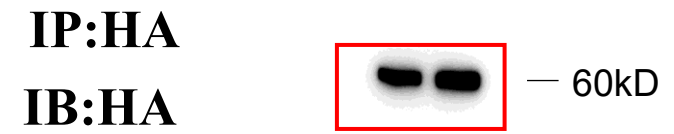

Supplement: sd2 [file 2]
